# Supplementary material for: A Dense Genetic Linkage Map for Common Carp and Its Integration with a BAC-Based Physical Map
Source: PLoS One. 2013 May 21;8(5):e63928. doi: 10.1371/journal.pone.0063928 (PMC3660343; doi:10.1371/journal.pone.0063928)
Supplement: Table S7 — The BLASTn results of contigs on the integrated map of the common carp against zebrafish genome. (XLS) [file pone.0063928.s010.xls]

## Sheet: result
Abbreviations : BAC (bacterial artificial chromosome);BES (BAC end sequence).
Contig ID	BAC ID	BES ID	Zebrafish Chromosome	Identity	Match(bp)	Mismatch(bp)	start of bes	end of bes	start of zebrafish chromosome	end of zebrafish chromosome	E-Value
ctg1008	CYC007O15	CYC007O15.r	chr11	91	100	7	127	225	34378957	34378859	3e-22
ctg1008	CYC046G20	CYC046G20.f	chr11	91.11	45	4	562	606	34762343	34762387	4e-06
ctg1008	CYC046G20	CYC046G20.r	chr11	89.73	146	15	428	573	35028954	35029099	3e-40
ctg1008	CYC051P11	CYC051P11.f	chr11	94.18	189	11	424	612	34709875	34710063	2e-75
ctg1008	CYC051P11	CYC051P11.r	chr11	86.75	83	11	172	254	35101158	35101240	4e-12
ctg1008	CYC056K13	CYC056K13.f	chr11	87.94	199	23	414	612	35139089	35138892	5e-48
ctg1008	CYC060E19	CYC060E19.f	chr11	89.47	133	14	654	786	34603359	34603227	9e-35
ctg1008	CYC060E19	CYC060E19.r	chr14	81.82	110	20	459	568	12870556	12870665	9e-07
ctg1008	CYC064H16	CYC064H16.f	chr11	89.08	119	13	11	129	34900437	34900319	6e-29
ctg1008	CYC064H16	CYC064H16.r	chr11	83.78	111	18	201	311	34594939	34595049	4e-12
ctg1008	CYC079K24	CYC079K24.r	chr11	82.66	421	53	53	456	34515609	34516026	6e-60
ctg1008	CYC086L02	CYC086L02.f	chr11	87.95	83	7	398	477	34613144	34613226	2e-10
ctg1008	CYC086L02	CYC086L02.r	chr5	86.13	173	20	17	187	61987721	61987551	3e-28
ctg1008	CYC135L20	CYC135L20.r	chr11	91.67	48	4	26	73	34342665	34342712	7e-09
ctg1029	CYC041D21	CYC041D21.f	chr3	96.36	55	2	701	755	34634900	34634954	6e-17
ctg1029	CYC045B14	CYC045B14.r	chr2	97.44	39	1	144	182	8739957	8739919	9e-10
ctg1029	CYC071I08	CYC071I08.f	chr25	84.17	120	19	586	705	34537433	34537552	4e-15
ctg1029	CYC071I08	CYC071I08.r	chr2	97.44	39	1	144	182	8739957	8739919	1e-09
ctg1091	CYC009G16	CYC009G16.f	chr6	81.15	122	23	320	441	17515464	17515343	9e-07
ctg1091	CYC009G16	CYC009G16.r	chr23	93.02	43	3	1	43	29370882	29370924	2e-07
ctg1091	CYC011A10	CYC011A10.f	chr22	87.86	140	17	28	167	21514477	21514338	3e-32
ctg1091	CYC011A10	CYC011A10.r	chr22	98.69	153	2	440	592	22235424	22235272	2e-75
ctg1091	CYC014C19	CYC014C19.f	chr22	90.2	153	15	104	256	22235272	22235424	2e-44
ctg1091	CYC016A16	CYC016A16.f	chr9	81.82	253	46	445	697	495977	495725	5e-30
ctg1091	CYC016A16	CYC016A16.r	chr22	96.73	153	5	440	592	22235424	22235272	3e-68
ctg1091	CYC016O20	CYC016O20.f	chr7	86.96	184	24	1	184	55010479	55010662	2e-41
ctg1091	CYC016O20	CYC016O20.r	chr7	82.26	327	45	338	662	55309176	55308861	2e-41
ctg1091	CYC021I09	CYC021I09.f	chr22	98.04	153	3	438	590	22235424	22235272	5e-73
ctg1091	CYC021I09	CYC021I09.r	chr19	95.45	44	2	57	100	2756345	2756388	2e-10
ctg1091	CYC023D17	CYC023D17.r	chr22	98.04	153	3	439	591	22235424	22235272	5e-73
ctg1091	CYC023F05	CYC023F05.f	chr13	91.25	80	7	720	799	49868148	49868227	8e-20
ctg1091	CYC023F05	CYC023F05.r	chr9	87.36	87	10	435	520	577696	577610	3e-12
ctg1091	CYC028O02	CYC028O02.f	chr22	97.39	153	4	65	217	22235424	22235272	1e-70
ctg1091	CYC033H07	CYC033H07.f	chr2	88.57	70	8	640	709	23279777	23279846	2e-11
ctg1091	CYC036C21	CYC036C21.f	chr7	86.91	191	23	597	785	55310760	55310950	2e-38
ctg1091	CYC036C21	CYC036C21.r	chr11	96.97	33	1	101	133	20295505	20295537	3e-06
ctg1091	CYC036E06	CYC036E06.f	chr22	98.69	153	2	65	217	22235424	22235272	2e-75
ctg1091	CYC036E06	CYC036E06.r	chr22	87.58	153	19	358	510	22241652	22241804	6e-35
ctg1091	CYC043M23	CYC043M23.f	chr6	86.83	334	36	165	498	27769728	27769403	5e-82
ctg1091	CYC043M23	CYC043M23.r	chr6	88.89	81	8	173	253	13646989	13647068	2e-13
ctg1091	CYC045O10	CYC045O10.f	chr2	96.3	378	14	170	547	21692741	21693118	0
ctg1091	CYC045O10	CYC045O10.r	chr2	88.41	164	19	441	604	22023227	22023064	2e-41
ctg1091	CYC048G05	CYC048G05.f	chr7	90.24	82	8	464	545	55000682	55000763	1e-18
ctg1091	CYC048G05	CYC048G05.r	chr7	92.76	304	16	19	320	55235155	55234856	6e-94
ctg1091	CYC048I03	CYC048I03.f	chr21	100	30	0	324	353	35267640	35267611	9e-07
ctg1091	CYC050F22	CYC050F22.f	chr9	80.85	757	140	16	768	565339	564584	2e-91
ctg1091	CYC052C23	CYC052C23.f	chr22	97.39	153	4	408	560	22235424	22235272	1e-70
ctg1091	CYC052C23	CYC052C23.r	chr9	87.18	78	10	18	95	499085	499008	1e-11
ctg1091	CYC052N11	CYC052N11.r	chr22	90.2	153	15	110	262	22235424	22235272	1e-44
ctg1091	CYC052O11	CYC052O11.f	chr9	94.59	37	2	12	48	49123111	49123147	1e-06
ctg1091	CYC052O11	CYC052O11.r	chr22	98.69	153	2	440	592	22235424	22235272	2e-75
ctg1091	CYC053O08	CYC053O08.r	chr3	94.34	53	3	154	206	36594611	36594559	2e-13
ctg1091	CYC053O12	CYC053O12.r	chr9	87.04	108	14	634	741	751703	751810	6e-20
ctg1091	CYC055C14	CYC055C14.r	chr9	89.66	58	6	452	509	815927	815984	4e-09
ctg1091	CYC060D08	CYC060D08.f	chr22	91.5	153	13	51	203	22235424	22235272	4e-49
ctg1091	CYC060D08	CYC060D08.r	chr22	98.69	153	2	435	587	22235272	22235424	2e-75
ctg1091	CYC062I07	CYC062I07.f	chr22	88.89	153	17	367	519	22235424	22235272	1e-39
ctg1091	CYC062I07	CYC062I07.r	chr9	81.4	613	114	17	629	565339	564727	1e-82
ctg1091	CYC081H17	CYC081H17.f	chr9	80.35	173	33	499	671	941776	941605	1e-08
ctg1091	CYC082N16	CYC082N16.f	chr7	89.36	94	8	176	269	55235325	55235416	3e-19
ctg1091	CYC082N16	CYC082N16.r	chr7	87.88	652	62	3	648	55542427	55541787	2e-168
ctg1091	CYC082N20	CYC082N20.f	chr7	93.85	65	3	89	152	55235221	55235285	9e-16
ctg1091	CYC082N20	CYC082N20.r	chr7	87.88	652	62	3	648	55542427	55541787	2e-168
ctg1091	CYC083L15	CYC083L15.f	chr9	88.24	68	8	144	211	824377	824444	2e-10
ctg1091	CYC084L06	CYC084L06.r	chr9	82.64	576	95	1	572	564244	564818	1e-85
ctg1091	CYC087J06	CYC087J06.r	chr12	85.56	187	25	28	214	16284763	16284947	3e-31
ctg1091	CYC089B19	CYC089B19.f	chr22	90.2	153	15	108	260	22235424	22235272	1e-44
ctg1091	CYC089B19	CYC089B19.r	chr22	89.29	140	15	362	501	21514477	21514338	1e-36
ctg1091	CYC090O08	CYC090O08.f	chr22	91.5	153	13	51	203	22235424	22235272	4e-49
ctg1091	CYC090O08	CYC090O08.r	chr22	90.2	153	15	104	256	22235272	22235424	2e-44
ctg1091	CYC135B16	CYC135B16.f	chr4	92.31	52	4	43	94	10877081	10877132	2e-10
ctg110	CYC004B03	CYC004B03.f	chr5	90.43	115	11	51	165	46627878	46627764	6e-32
ctg110	CYC004B03	CYC004B03.r	chr5	85.62	292	35	1	288	46284188	46284476	3e-52
ctg110	CYC005E20	CYC005E20.f	chr5	87.5	432	54	208	639	45318147	45318578	9e-118
ctg110	CYC005E20	CYC005E20.r	chr5	89.86	138	12	556	691	45602362	45602225	5e-36
ctg110	CYC007M09	CYC007M09.r	chr12	92.53	174	12	15	187	45222487	45222314	3e-59
ctg110	CYC009B07	CYC009B07.f	chr5	87.8	82	10	376	457	44630636	44630555	7e-14
ctg110	CYC009B07	CYC009B07.r	chr5	84.96	113	13	522	631	44468878	44468989	3e-09
ctg110	CYC009P18	CYC009P18.f	chr4	90.57	53	5	693	745	28161970	28162022	2e-08
ctg110	CYC012H06	CYC012H06.f	chr6	86.05	86	12	223	308	29080061	29080146	1e-11
ctg110	CYC012H06	CYC012H06.r	chr5	90.91	77	7	54	130	46296041	46296117	3e-18
ctg110	CYC012P18	CYC012P18.r	chr5	89.04	73	8	176	248	46279063	46279135	2e-13
ctg110	CYC013K17	CYC013K17.f	chr5	94.55	55	3	123	177	46683947	46684001	2e-14
ctg110	CYC015H19	CYC015H19.f	chr5	86.07	122	13	511	628	45913594	45913473	1e-14
ctg110	CYC015H19	CYC015H19.r	chr5	86.54	156	21	119	274	45409991	45410146	6e-32
ctg110	CYC021K11	CYC021K11.f	chr5	86.09	381	51	4	382	46295964	46295584	6e-85
ctg110	CYC021K11	CYC021K11.r	chr5	92.62	122	9	465	586	45900784	45900905	4e-40
ctg110	CYC023B11	CYC023B11.r	chr5	84.79	263	26	225	474	43800447	43800708	1e-52
ctg110	CYC035O06	CYC035O06.f	chr13	94.04	369	19	1	367	35528354	35528721	2e-152
ctg110	CYC037A10	CYC037A10.f	chr12	84.44	90	13	472	561	45343300	45343212	8e-07
ctg110	CYC037A10	CYC037A10.r	chr12	95.77	307	13	132	438	44932507	44932813	4e-141
ctg110	CYC038D05	CYC038D05.r	chr5	88.89	54	6	475	528	44483731	44483784	8e-07
ctg110	CYC039D03	CYC039D03.f	chr5	90.4	177	13	216	388	45172830	45173006	3e-53
ctg110	CYC039J12	CYC039J12.f	chr4	84.21	152	17	30	175	54268286	54268136	2e-20
ctg110	CYC039J12	CYC039J12.r	chr5	87.46	335	42	53	387	46811026	46811360	2e-88
ctg110	CYC041D24	CYC041D24.f	chr12	92.04	201	16	420	620	44940593	44940393	1e-70
ctg110	CYC046B04	CYC046B04.r	chr5	94.94	79	4	199	277	43874415	43874493	7e-27
ctg110	CYC048G18	CYC048G18.f	chr12	92.26	155	11	1	154	45222468	45222314	2e-50
ctg110	CYC048G18	CYC048G18.r	chr12	94.71	170	9	446	615	44943465	44943634	8e-69
ctg110	CYC048J05	CYC048J05.f	chr14	100	37	0	128	164	30668586	30668622	5e-11
ctg110	CYC048J05	CYC048J05.r	chr5	80.45	312	37	14	325	45551601	45551314	6e-32
ctg110	CYC049D20	CYC049D20.f	chr5	86.78	121	14	108	228	45702147	45702265	4e-18
ctg110	CYC049D20	CYC049D20.r	chr5	89.03	319	28	39	350	46113517	46113199	6e-94
ctg110	CYC051P24	CYC051P24.f	chr12	83.86	223	23	534	756	44954463	44954672	8e-35
ctg110	CYC052D03	CYC052D03.f	chr12	89.88	514	38	9	521	44954963	44954463	6e-168
ctg110	CYC055K17	CYC055K17.f	chr5	87.38	420	32	4	422	46232492	46232891	1e-110
ctg110	CYC055K17	CYC055K17.r	chr5	82.58	287	37	116	391	46524272	46523988	9e-37
ctg110	CYC059P22	CYC059P22.f	chr5	88.94	217	21	20	233	45271852	45271636	7e-60
ctg110	CYC061J01	CYC061J01.f	chr5	90.91	77	3	274	349	45552865	45552938	1e-14
ctg110	CYC063A10	CYC063A10.f	chr5	86.49	422	57	164	585	47073523	47073102	1e-104
ctg110	CYC063A10	CYC063A10.r	chr5	85.39	267	25	9	275	46625296	46625548	4e-41
ctg110	CYC065O01	CYC065O01.r	chr5	85.45	165	24	47	211	43766822	43766986	4e-30
ctg110	CYC067B18	CYC067B18.f	chr17	85.6	486	47	169	642	17331392	17331866	1e-110
ctg110	CYC067B18	CYC067B18.r	chr17	82.45	416	67	162	576	17676712	17676302	2e-60
ctg110	CYC069E22	CYC069E22.f	chr5	85.66	279	31	1	279	43824309	43824578	2e-62
ctg110	CYC069E22	CYC069E22.r	chr5	85.21	142	19	14	155	44625088	44624949	1e-21
ctg110	CYC070H18	CYC070H18.f	chr5	84.42	231	34	314	543	45158921	45158692	5e-36
ctg110	CYC079F16	CYC079F16.f	chr5	88.18	203	23	591	792	46877436	46877234	3e-50
ctg110	CYC079F16	CYC079F16.r	chr5	96.27	134	5	52	185	46625838	46625971	6e-57
ctg110	CYC080J16	CYC080J16.f	chr5	86.58	231	31	39	269	45410806	45410576	9e-53
ctg110	CYC080J16	CYC080J16.r	chr5	85.08	181	25	325	503	45262034	45262214	1e-27
ctg110	CYC080O05	CYC080O05.f	chr12	100	35	0	168	202	45126185	45126151	9e-10
ctg110	CYC081C24	CYC081C24.f	chr9	87.14	70	8	422	491	45177433	45177501	6e-07
ctg110	CYC081N19	CYC081N19.f	chr10	87.88	66	8	420	485	20096367	20096432	3e-09
ctg110	CYC081N19	CYC081N19.r	chr5	88.68	53	6	218	270	46644445	46644393	2e-06
ctg110	CYC083G18	CYC083G18.f	chr5	89.02	82	9	399	480	45465432	45465513	2e-16
ctg110	CYC083G18	CYC083G18.r	chr5	80	225	42	12	233	45702017	45701793	2e-16
ctg110	CYC085F01	CYC085F01.f	chr5	96.3	81	3	272	352	72510250	72510170	4e-30
ctg110	CYC085F01	CYC085F01.r	chr5	88.11	143	17	580	722	46241251	46241109	1e-33
ctg110	CYC085N11	CYC085N11.f	chr7	91.38	58	5	111	168	22590270	22590213	2e-11
ctg110	CYC085N11	CYC085N11.r	chr5	85.71	126	16	594	717	45964620	45964495	2e-19
ctg110	CYC087M13	CYC087M13.f	chr5	80.97	268	40	1	267	46245431	46245688	9e-25
ctg110	CYC087M13	CYC087M13.r	chr5	94.68	188	10	1	188	46586293	46586106	4e-77
ctg110	CYC089P13	CYC089P13.f	chr5	88.67	309	32	249	555	45725791	45726098	1e-82
ctg110	CYC092G10	CYC092G10.f	chr5	80.45	312	37	11	322	45551601	45551314	5e-32
ctg110	CYC092G10	CYC092G10.r	chr22	88.41	69	8	565	633	5299471	5299539	6e-11
ctg110	CYC096F24	CYC096F24.f	chr8	97.37	38	1	436	473	23684977	23684940	3e-09
ctg110	CYC098L15	CYC098L15.f	chr5	82.58	287	37	297	572	46524272	46523988	1e-36
ctg110	CYC098L15	CYC098L15.r	chr5	92.62	122	9	274	395	45900784	45900905	2e-40
ctg110	CYC099M24	CYC099M24.r	chr5	87.64	178	21	325	501	45773962	45774139	3e-40
ctg110	CYC100K02	CYC100K02.r	chr5	90.07	141	14	362	502	46444389	46444249	1e-39
ctg1100	CYC029H13	CYC029H13.f	chr5	86.62	157	19	489	643	73178056	73177900	1e-27
ctg1100	CYC029H13	CYC029H13.r	chr2	97.3	37	1	265	301	25127475	25127511	1e-08
ctg1100	CYC049F16	CYC049F16.r	chr15	83.47	242	38	476	716	30371378	30371138	5e-33
ctg1100	CYC049H05	CYC049H05.f	chr3	93.02	43	3	605	647	35309404	35309446	2e-07
ctg1100	CYC050K14	CYC050K14.f	chr5	94.83	58	3	211	268	73051208	73051265	3e-16
ctg1100	CYC058A05	CYC058A05.r	chr5	91.55	71	6	533	603	73133048	73133118	6e-17
ctg1100	CYC070B06	CYC070B06.r	chr25	91.03	78	7	166	243	19660197	19660274	9e-19
ctg111	CYC009F14	CYC009F14.f	chr10	85.14	222	24	110	322	40727278	40727057	5e-39
ctg111	CYC015J22	CYC015J22.r	chr10	89.29	523	42	172	693	40852558	40852049	1e-163
ctg111	CYC024I05	CYC024I05.f	chr10	82.83	198	31	126	321	40140690	40140494	1e-18
ctg111	CYC024I05	CYC024I05.r	chr10	93.91	197	12	210	406	39728396	39728592	9e-78
ctg111	CYC024M05	CYC024M05.f	chr11	86.84	152	19	636	786	19915434	19915585	2e-29
ctg111	CYC024M05	CYC024M05.r	chr10	93.54	325	21	212	536	40811998	40812322	8e-133
ctg111	CYC030E19	CYC030E19.f	chr10	91.82	110	9	228	337	40608168	40608059	5e-33
ctg111	CYC030E19	CYC030E19.r	chr10	82.91	117	20	58	174	16382768	16382884	5e-11
ctg111	CYC038F24	CYC038F24.f	chr10	96.08	255	8	426	678	40796270	40796524	2e-115
ctg111	CYC038F24	CYC038F24.r	chr10	95	180	9	321	500	41124374	41124195	5e-75
ctg111	CYC047H07	CYC047H07.f	chr10	91.89	111	9	95	205	40541157	40541267	3e-34
ctg111	CYC047H07	CYC047H07.r	chr10	90.5	379	26	116	490	40786832	40786460	2e-123
ctg111	CYC050P09	CYC050P09.f	chr10	100	84	0	73	156	39498541	39498624	1e-39
ctg111	CYC050P09	CYC050P09.r	chr10	87.03	239	25	313	547	39788934	39788698	4e-52
ctg111	CYC056H09	CYC056H09.f	chr2	90.16	61	6	214	274	47750975	47751035	5e-11
ctg111	CYC056H09	CYC056H09.r	chr6	97.67	43	1	263	305	5991864	5991822	3e-12
ctg111	CYC061C11	CYC061C11.f	chr10	96.77	124	4	403	526	39899171	39899048	2e-53
ctg111	CYC061C11	CYC061C11.r	chr10	91.28	195	17	562	756	39651748	39651942	1e-64
ctg111	CYC061H04	CYC061H04.f	chr8	91.3	46	4	122	167	10109322	10109277	1e-06
ctg111	CYC061H04	CYC061H04.r	chr4	92.86	42	3	242	283	43344678	43344637	8e-07
ctg111	CYC066K10	CYC066K10.f	chr23	85.08	181	27	50	230	11483977	11484157	2e-32
ctg111	CYC068K19	CYC068K19.f	chr1	90	50	5	224	273	7792208	7792257	8e-07
ctg111	CYC068K19	CYC068K19.r	chr10	88.46	52	6	265	316	41145695	41145644	6e-06
ctg111	CYC069M02	CYC069M02.r	chr1	95.71	70	2	542	611	51244449	51244381	4e-21
ctg111	CYC081J12	CYC081J12.f	chr10	86.29	175	20	451	623	40308809	40308637	2e-29
ctg111	CYC083L11	CYC083L11.r	chr10	83.92	143	23	20	162	40684054	40684196	2e-19
ctg111	CYC089L06	CYC089L06.r	chr10	83.11	450	64	91	535	40410201	40410643	3e-71
ctg111	CYC096D17	CYC096D17.r	chr22	95.92	49	2	82	130	1080876	1080924	9e-14
ctg111	CYC134K18	CYC134K18.f	chr10	91.25	80	7	580	659	41068519	41068598	6e-20
ctg111	CYC134M18	CYC134M18.f	chr10	86.24	109	14	345	452	40968066	40968174	8e-16
ctg111	CYC134M18	CYC134M18.r	chr10	87.14	140	17	241	379	41470804	41470665	3e-27
ctg1123	CYC006I12	CYC006I12.f	chr3	84.3	223	30	453	671	34380775	34380554	2e-35
ctg1123	CYC006I12	CYC006I12.r	chr3	94.23	104	6	165	268	34122135	34122238	1e-36
ctg1123	CYC011A01	CYC011A01.f	chr10	88.89	99	8	116	214	37759317	37759412	2e-17
ctg1123	CYC011A01	CYC011A01.r	chr7	87.72	57	7	79	135	49019544	49019488	3e-06
ctg1123	CYC013B15	CYC013B15.f	chr7	90.07	151	15	564	714	20338566	20338416	4e-43
ctg1123	CYC013B15	CYC013B15.r	chr3	89.12	239	23	224	462	34328337	34328572	3e-68
ctg1123	CYC016K02	CYC016K02.f	chr3	89.39	66	7	52	117	33984630	33984565	1e-11
ctg1123	CYC016K02	CYC016K02.r	chr3	84	100	16	303	402	33822237	33822336	1e-10
ctg1123	CYC024F06	CYC024F06.f	chr21	92.59	54	4	551	604	9697557	9697504	1e-11
ctg1123	CYC024F06	CYC024F06.r	chr8	89.05	411	36	199	600	15497459	15497049	3e-129
ctg1123	CYC024P23	CYC024P23.f	chr2	97.87	47	1	303	349	56178020	56177974	2e-14
ctg1123	CYC024P23	CYC024P23.r	chr15	88.89	63	7	29	91	15970050	15970112	9e-10
ctg1123	CYC042P09	CYC042P09.f	chr3	90.57	53	4	380	431	53585288	53585236	2e-06
ctg1123	CYC053O18	CYC053O18.f	chr8	82.7	289	44	183	467	15154821	15155107	1e-39
ctg1123	CYC053P16	CYC053P16.f	chr3	87.06	371	24	205	568	33910931	33910578	4e-92
ctg1123	CYC053P16	CYC053P16.r	chr13	88.39	112	11	493	602	10662599	10662488	7e-23
ctg1123	CYC068K14	CYC068K14.f	chr15	88.89	63	7	27	89	15970050	15970112	1e-09
ctg1123	CYC073H21	CYC073H21.f	chr12	85.93	135	19	345	479	32497634	32497500	3e-24
ctg1123	CYC073H21	CYC073H21.r	chr16	97.37	38	1	362	399	9850262	9850299	3e-09
ctg1123	CYC086F01	CYC086F01.f	chr5	92.31	52	4	534	585	23826829	23826778	3e-10
ctg1123	CYC086F01	CYC086F01.r	chr7	85.37	123	16	619	740	71361580	71361459	2e-14
ctg1123	CYC087M17	CYC087M17.f	chr3	85.03	167	25	294	460	34052091	34052257	5e-29
ctg1123	CYC087M17	CYC087M17.r	chr3	89.34	122	13	531	652	34298317	34298196	1e-30
ctg1125	CYC009O11	CYC009O11.f	chr24	88.06	134	16	247	380	9043229	9043362	1e-30
ctg1125	CYC011J12	CYC011J12.r	chr3	91.58	95	7	161	255	23512697	23512790	4e-24
ctg1125	CYC020N14	CYC020N14.f	chr3	85.96	349	44	171	518	23529363	23529707	3e-74
ctg1125	CYC020N14	CYC020N14.r	chr3	92.65	136	8	114	247	23846819	23846684	2e-44
ctg1125	CYC024K18	CYC024K18.f	chr3	90.15	132	12	482	613	23870050	23869920	4e-34
ctg1125	CYC052O23	CYC052O23.f	chr3	94.83	116	6	1	116	23600493	23600378	9e-44
ctg1125	CYC055B21	CYC055B21.f	chr3	87.19	203	26	223	425	23735955	23735753	6e-48
ctg1125	CYC058H06	CYC058H06.f	chr3	87.15	179	19	422	597	23560232	23560409	4e-37
ctg1125	CYC065C05	CYC065C05.f	chr7	94.74	57	3	381	437	24190548	24190604	9e-16
ctg1125	CYC065C05	CYC065C05.r	chr3	92.25	142	11	375	516	23279682	23279823	2e-47
ctg1125	CYC075F04	CYC075F04.r	chr3	92.52	428	17	261	673	23809807	23809380	2e-143
ctg1125	CYC095P05	CYC095P05.f	chr22	80.63	253	43	61	310	9980766	9981015	1e-14
ctg1129	CYC007J03	CYC007J03.f	chr6	82.87	251	40	463	711	4678356	4678605	7e-29
ctg1129	CYC007J03	CYC007J03.r	chr6	83.06	307	40	249	543	4914296	4913990	1e-54
ctg1129	CYC011P18	CYC011P18.f	chr6	82.55	487	83	56	540	4883554	4883068	8e-72
ctg1129	CYC011P18	CYC011P18.r	chr6	83.08	195	30	464	656	4678356	4678549	2e-19
ctg1129	CYC024E16	CYC024E16.f	chr6	84.62	182	21	431	606	4544477	4544657	8e-29
ctg1129	CYC024E16	CYC024E16.r	chr6	85.45	385	46	1	375	4718850	4718466	1e-86
ctg1129	CYC033C24	CYC033C24.r	chr6	88.32	137	15	248	384	4380089	4379954	4e-30
ctg1129	CYC042A23	CYC042A23.f	chr17	95	40	2	544	583	3105055	3105094	5e-08
ctg1129	CYC042A23	CYC042A23.r	chr6	91.88	271	21	1	271	4470441	4470172	1e-95
ctg1129	CYC051B07	CYC051B07.r	chr6	92.75	69	3	701	769	4760602	4760536	3e-16
ctg1129	CYC097H04	CYC097H04.f	chr8	89.19	74	7	451	523	16056983	16057056	1e-11
ctg1129	CYC097H04	CYC097H04.r	chr6	89.12	147	13	248	392	4702307	4702162	2e-31
ctg1129	CYC099H22	CYC099H22.r	chr6	94.51	164	9	1	164	4282934	4283097	1e-65
ctg1135	CYC005N20	CYC005N20.r	chr16	91.45	152	11	43	192	51820295	51820144	8e-44
ctg1135	CYC007M15	CYC007M15.f	chr7	92.45	424	32	1	424	26561932	26561509	2e-165
ctg1135	CYC007M15	CYC007M15.r	chr16	91.11	45	4	169	213	33796550	33796506	4e-06
ctg1135	CYC008E20	CYC008E20.f	chr20	85.09	342	47	109	446	40953556	40953897	1e-64
ctg1135	CYC008E20	CYC008E20.r	chr20	82.37	295	21	217	481	41142127	41141834	1e-29
ctg1135	CYC009D02	CYC009D02.f	chr20	83.21	137	22	20	155	41598479	41598343	3e-13
ctg1135	CYC009D02	CYC009D02.r	chr20	93.45	168	11	11	178	41290388	41290555	7e-63
ctg1135	CYC010J19	CYC010J19.r	chr7	90.5	221	20	1	220	26387236	26387456	3e-68
ctg1135	CYC011E21	CYC011E21.r	chr12	91.38	58	5	258	315	30719287	30719344	1e-11
ctg1135	CYC014F21	CYC014F21.f	chr12	88.89	81	9	80	160	4090229	4090149	9e-16
ctg1135	CYC014F21	CYC014F21.r	chr12	89.55	134	14	463	596	3875670	3875803	2e-35
ctg1135	CYC016M12	CYC016M12.f	chr16	89.36	141	13	310	449	51173126	51173265	2e-32
ctg1135	CYC016M12	CYC016M12.r	chr16	91.27	126	9	2	126	51566368	51566244	5e-33
ctg1135	CYC018J17	CYC018J17.r	chr17	84.82	191	26	50	240	19828514	19828701	2e-32
ctg1135	CYC018L02	CYC018L02.f	chr7	90.75	227	20	147	373	26699297	26699072	8e-72
ctg1135	CYC018L02	CYC018L02.r	chr7	100	29	0	66	94	26551740	26551768	2e-06
ctg1135	CYC025J06	CYC025J06.f	chr12	87.32	142	18	296	437	4059285	4059144	1e-30
ctg1135	CYC032M15	CYC032M15.r	chr7	82.96	452	70	93	541	26400183	26400630	5e-70
ctg1135	CYC036A04	CYC036A04.f	chr16	91.2	125	9	1	124	51566367	51566244	2e-32
ctg1135	CYC039A10	CYC039A10.f	chr20	90.57	244	22	100	342	41640914	41640671	4e-77
ctg1135	CYC040M22	CYC040M22.r	chr20	82.37	295	21	217	481	41142127	41141834	1e-29
ctg1135	CYC047I02	CYC047I02.f	chr16	95.79	95	4	575	669	50877938	50878032	5e-36
ctg1135	CYC047I02	CYC047I02.r	chr16	91.79	134	11	134	267	51169234	51169101	1e-42
ctg1135	CYC048D12	CYC048D12.f	chr5	87.65	81	10	309	389	52875114	52875034	3e-13
ctg1135	CYC048D12	CYC048D12.r	chr20	93.15	219	15	138	356	41503082	41502864	9e-84
ctg1135	CYC048F01	CYC048F01.f	chr20	82.37	295	21	172	436	41142127	41141834	1e-29
ctg1135	CYC048F01	CYC048F01.r	chr20	83.86	446	69	3	447	40805770	40806213	4e-76
ctg1135	CYC060B06	CYC060B06.f	chr13	90	60	6	239	298	33718101	33718160	3e-10
ctg1135	CYC067P01	CYC067P01.f	chr7	92.31	65	5	1	65	26506100	26506164	3e-16
ctg1135	CYC067P01	CYC067P01.r	chr7	87.67	73	9	4	76	26704700	26704628	7e-12
ctg1135	CYC068O19	CYC068O19.f	chr8	97.3	37	1	456	492	41981360	41981396	1e-08
ctg1135	CYC068O19	CYC068O19.r	chr20	89.86	138	12	27	162	42032754	42032617	4e-33
ctg1135	CYC077C02	CYC077C02.r	chr16	84.62	221	25	176	392	51251653	51251868	5e-36
ctg1135	CYC082N21	CYC082N21.f	chr16	90	50	5	175	224	33796550	33796501	7e-07
ctg1135	CYC085D19	CYC085D19.f	chr13	90.38	52	5	66	117	31164015	31163964	6e-08
ctg1135	CYC085D19	CYC085D19.r	chr16	95.79	95	4	579	673	50877938	50878032	5e-36
ctg1135	CYC087B18	CYC087B18.f	chr7	88.24	68	8	400	467	26677364	26677297	2e-10
ctg1135	CYC087B18	CYC087B18.r	chr7	87.18	78	10	324	401	26489828	26489905	1e-11
ctg1135	CYC087G18	CYC087G18.r	chr20	92.06	214	17	462	675	41672413	41672626	5e-76
ctg1135	CYC087O10	CYC087O10.r	chr5	91.84	49	2	435	483	7941168	7941214	8e-07
ctg1135	CYC088F17	CYC088F17.r	chr16	90.42	595	32	13	587	12047619	12047030	0
ctg1135	CYC091E04	CYC091E04.r	chr16	87.01	77	10	479	555	51052000	51051924	4e-11
ctg1135	CYC092J17	CYC092J17.f	chr7	91.18	272	24	6	277	26600259	26600530	6e-94
ctg1135	CYC092J17	CYC092J17.r	chr7	91.13	203	18	90	292	26786061	26785859	3e-67
ctg1135	CYC092K12	CYC092K12.r	chr7	93.45	595	36	1	594	26592684	26593276	0
ctg1135	CYC093B21	CYC093B21.f	chr21	90.14	71	7	399	469	37702607	37702537	2e-14
ctg1135	CYC093B21	CYC093B21.r	chr5	91.84	49	2	374	422	7941168	7941214	7e-07
ctg1135	CYC096H15	CYC096H15.r	chr20	91.3	46	4	50	95	41839156	41839111	6e-07
ctg1135	CYC100K07	CYC100K07.f	chr20	91.57	83	6	524	605	42063196	42063114	2e-19
ctg1135	CYC100N14	CYC100N14.r	chr16	95.1	245	8	161	401	51056325	51056569	4e-100
ctg1138	CYC009E06	CYC009E06.f	chr10	86.9	84	11	646	729	35967335	35967252	1e-12
ctg1138	CYC009E06	CYC009E06.r	chr6	98	50	1	335	384	20597252	20597203	2e-16
ctg1138	CYC020E06	CYC020E06.r	chr8	90.91	88	8	531	618	36839727	36839814	2e-22
ctg1138	CYC058G24	CYC058G24.f	chr1	86.96	69	9	555	623	14369482	14369550	1e-08
ctg1138	CYC070C16	CYC070C16.f	chr6	90.12	172	17	80	251	20853200	20853029	6e-51
ctg1138	CYC070C16	CYC070C16.r	chr6	91.47	375	32	25	399	20599738	20600112	3e-136
ctg1138	CYC070C20	CYC070C20.f	chr16	93.25	593	35	11	602	12047619	12047031	0
ctg1138	CYC070C20	CYC070C20.r	chr6	82.29	288	38	308	594	20792449	20792174	7e-38
ctg1138	CYC091F21	CYC091F21.f	chr6	89.47	57	6	306	362	20792449	20792393	7e-09
ctg1138	CYC091F21	CYC091F21.r	chr6	83.94	137	22	74	210	20583246	20583382	3e-18
ctg1138	CYC093P09	CYC093P09.f	chr11	90.38	52	5	98	149	8102259	8102310	6e-08
ctg1138	CYC093P09	CYC093P09.r	chr6	92.28	337	26	3	339	20599776	20600112	6e-128
ctg114	CYC004I03	CYC004I03.f	chr4	82.41	398	51	295	684	21510989	21510603	1e-46
ctg114	CYC004I03	CYC004I03.r	chr4	92.27	207	16	456	662	21278855	21279061	3e-74
ctg114	CYC008C22	CYC008C22.r	chr4	91.48	305	24	442	744	20708368	20708064	5e-107
ctg114	CYC012D10	CYC012D10.f	chr6	90.74	54	5	444	497	21754379	21754326	3e-09
ctg114	CYC012D10	CYC012D10.r	chr5	87.93	174	21	313	486	30205969	30205796	1e-42
ctg114	CYC012G22	CYC012G22.f	chr5	88.48	330	21	1	330	31410300	31409988	3e-99
ctg114	CYC012G22	CYC012G22.r	chr5	82.2	590	105	114	703	31172229	31172818	2e-90
ctg114	CYC019L21	CYC019L21.r	chr5	87.74	155	19	521	675	31365097	31365251	5e-36
ctg114	CYC020F08	CYC020F08.r	chr5	89.95	567	52	152	714	30266999	30267564	0
ctg114	CYC021K14	CYC021K14.f	chr5	86.06	330	39	443	768	31793606	31793280	3e-62
ctg114	CYC021K14	CYC021K14.r	chr5	91.3	46	4	1	46	31463919	31463964	3e-07
ctg114	CYC022M03	CYC022M03.f	chr5	91.14	158	14	540	697	31532397	31532554	1e-49
ctg114	CYC022M03	CYC022M03.r	chr5	94.44	90	5	122	211	31794489	31794400	1e-30
ctg114	CYC026K02	CYC026K02.f	chr5	81.66	398	54	29	419	30742687	30742302	3e-56
ctg114	CYC026K02	CYC026K02.r	chr5	87.23	94	11	118	211	30542831	30542923	7e-14
ctg114	CYC026M22	CYC026M22.f	chr5	85.54	83	12	1	83	31795102	31795184	9e-11
ctg114	CYC026M22	CYC026M22.r	chr5	93.75	128	8	4	131	32052058	32051931	6e-47
ctg114	CYC026O20	CYC026O20.r	chr4	91.1	281	25	20	300	20677147	20677427	7e-97
ctg114	CYC027I22	CYC027I22.f	chr5	90.11	435	43	262	696	30238903	30239337	8e-146
ctg114	CYC027I22	CYC027I22.r	chr5	93.39	121	8	85	205	30634475	30634355	5e-42
ctg114	CYC032H03	CYC032H03.f	chr24	94.74	57	3	345	401	4592810	4592754	1e-15
ctg114	CYC032H03	CYC032H03.r	chr4	83.98	206	33	31	236	21274897	21275102	5e-33
ctg114	CYC033B03	CYC033B03.f	chr5	85	260	36	62	320	30086147	30085890	9e-47
ctg114	CYC033B03	CYC033B03.r	chr16	92.92	593	35	13	604	12047619	12047033	0
ctg114	CYC034P04	CYC034P04.f	chr5	87.34	79	10	621	699	30856806	30856728	4e-12
ctg114	CYC034P04	CYC034P04.r	chr5	87.23	94	11	118	211	30542831	30542923	6e-14
ctg114	CYC038B24	CYC038B24.f	chr5	85.83	120	17	7	126	29966322	29966203	6e-20
ctg114	CYC038B24	CYC038B24.r	chr5	89.31	159	17	65	223	29665815	29665973	1e-43
ctg114	CYC041P15	CYC041P15.f	chr5	89.34	319	34	1	319	32088385	32088067	4e-98
ctg114	CYC041P15	CYC041P15.r	chr5	95	120	5	479	597	31675036	31675155	7e-44
ctg114	CYC041P24	CYC041P24.f	chr4	82.07	184	16	418	601	20974144	20974310	3e-24
ctg114	CYC041P24	CYC041P24.r	chr20	88.57	70	7	596	664	32031406	32031337	3e-09
ctg114	CYC049G01	CYC049G01.f	chr5	90	50	5	623	672	52748103	52748054	9e-07
ctg114	CYC049G01	CYC049G01.r	chr15	92	50	4	651	700	18636663	18636712	3e-09
ctg114	CYC050L06	CYC050L06.f	chr5	89.98	569	52	151	715	30266999	30267566	0
ctg114	CYC050M05	CYC050M05.f	chr5	90.27	586	52	151	732	30266999	30267583	0
ctg114	CYC052K07	CYC052K07.r	chr5	97.3	37	1	513	549	31472961	31472997	1e-08
ctg114	CYC055I09	CYC055I09.f	chr4	88.31	154	17	340	493	21495627	21495475	2e-35
ctg114	CYC055I09	CYC055I09.r	chr4	92.8	361	24	109	467	21300137	21300497	2e-140
ctg114	CYC056A04	CYC056A04.f	chr5	90.57	159	15	39	197	31301476	31301318	6e-48
ctg114	CYC056A04	CYC056A04.r	chr5	80.95	210	35	170	379	30931692	30931896	6e-13
ctg114	CYC056J23	CYC056J23.f	chr5	89.52	124	11	273	396	30988380	30988259	4e-30
ctg114	CYC056J23	CYC056J23.r	chr5	90.05	191	19	201	391	30754145	30754335	2e-57
ctg114	CYC057K13	CYC057K13.f	chr4	86.3	219	20	53	271	21387211	21387419	6e-51
ctg114	CYC057O14	CYC057O14.r	chr4	95.8	119	5	196	314	21432038	21432156	6e-48
ctg114	CYC064B23	CYC064B23.r	chr5	86.81	91	12	565	655	29663169	29663259	1e-14
ctg114	CYC065N11	CYC065N11.f	chr5	87.37	190	24	565	754	29663169	29663358	6e-45
ctg114	CYC067J22	CYC067J22.r	chr14	80.19	323	64	318	640	18754841	18754519	7e-29
ctg114	CYC068P03	CYC068P03.f	chr20	84.85	99	15	621	719	50644338	50644240	4e-12
ctg114	CYC068P03	CYC068P03.r	chr2	94.87	39	2	466	504	29453012	29453050	2e-07
ctg114	CYC070M10	CYC070M10.f	chr5	82.91	199	34	19	217	30710370	30710172	2e-26
ctg114	CYC070M10	CYC070M10.r	chr5	86.35	608	68	5	611	30421635	30422228	2e-143
ctg114	CYC072B09	CYC072B09.f	chr5	86.14	101	14	166	266	29414377	29414477	9e-16
ctg114	CYC072B09	CYC072B09.r	chr5	88.96	163	17	513	674	29858428	29858266	3e-31
ctg114	CYC077M07	CYC077M07.f	chr5	84.78	460	53	115	560	30288626	30289082	2e-78
ctg114	CYC084A08	CYC084A08.f	chr5	88.89	90	9	231	320	31833513	31833425	2e-16
ctg114	CYC084H04	CYC084H04.f	chr5	97.56	41	1	110	150	31162181	31162221	6e-11
ctg114	CYC085E10	CYC085E10.f	chr5	88.24	187	21	110	295	29987888	29988074	1e-45
ctg114	CYC085E10	CYC085E10.r	chr5	91.26	366	16	84	449	30217402	30217053	2e-134
ctg114	CYC086D19	CYC086D19.r	chr4	93.14	102	7	61	162	20442617	20442718	4e-33
ctg114	CYC090A05	CYC090A05.f	chr4	90.39	281	27	17	297	20677147	20677427	5e-92
ctg114	CYC090A05	CYC090A05.r	chr17	88.31	77	9	140	216	49728458	49728382	2e-13
ctg114	CYC091A01	CYC091A01.f	chr5	88.74	231	26	121	351	30386466	30386696	1e-64
ctg114	CYC091A01	CYC091A01.r	chr5	92.49	173	13	71	243	30802984	30802812	4e-61
ctg114	CYC091C13	CYC091C13.r	chr5	94.27	157	9	294	450	30409541	30409697	4e-61
ctg114	CYC091H01	CYC091H01.f	chr8	100	34	0	27	60	37003835	37003802	2e-09
ctg114	CYC091H01	CYC091H01.r	chr2	94.44	270	12	70	337	18183216	18183484	3e-110
ctg114	CYC093P02	CYC093P02.f	chr5	88.33	120	14	1	120	30801242	30801361	1e-27
ctg114	CYC093P02	CYC093P02.r	chr5	85.71	126	18	475	600	31088390	31088265	4e-21
ctg114	CYC096M10	CYC096M10.f	chr4	93.33	45	3	36	80	11918068	11918024	4e-09
ctg114	CYC096M10	CYC096M10.r	chr5	92.09	139	11	9	147	30244777	30244915	1e-45
ctg114	CYC097G13	CYC097G13.r	chr4	86.91	275	34	129	403	21515200	21514928	2e-65
ctg114	CYC099H18	CYC099H18.f	chr5	97.06	34	1	673	706	31589809	31589842	8e-07
ctg114	CYC099H18	CYC099H18.r	chr5	98.06	206	4	465	670	31776971	31776766	3e-102
ctg114	CYC099N15	CYC099N15.f	chr5	86.11	108	15	1	108	31212859	31212752	1e-17
ctg114	CYC099N15	CYC099N15.r	chr5	91.3	115	10	12	126	30737956	30738070	5e-34
ctg114	CYC132F17	CYC132F17.r	chr4	89.54	153	16	1	153	21143371	21143523	1e-42
ctg114	CYC132I08	CYC132I08.f	chr5	91.73	133	11	1	133	29968561	29968693	4e-42
ctg114	CYC132I08	CYC132I08.r	chr5	93.39	121	8	35	155	30634475	30634355	2e-42
ctg114	CYC133O16	CYC133O16.f	chr5	94.74	38	2	323	360	31628395	31628432	6e-07
ctg1144	CYC008K01	CYC008K01.r	chr14	88.35	266	31	30	295	52799260	52799525	1e-73
ctg1144	CYC010N08	CYC010N08.f	chr14	89.37	301	30	69	368	52867267	52866968	2e-87
ctg1144	CYC010N08	CYC010N08.r	chr14	83.18	107	18	118	224	52523034	52523140	5e-10
ctg1144	CYC012N15	CYC012N15.f	chr14	82.24	152	27	216	367	52548426	52548577	3e-15
ctg1144	CYC015C15	CYC015C15.f	chr2	92.78	97	7	689	785	10472018	10472114	5e-30
ctg1144	CYC015O04	CYC015O04.f	chr19	87.93	58	7	20	77	20562424	20562367	9e-07
ctg1144	CYC015O04	CYC015O04.r	chr12	95.56	45	2	177	221	28353531	28353487	5e-11
ctg1144	CYC017B11	CYC017B11.f	chr13	86.58	559	66	1	559	9861170	9860621	5e-140
ctg1144	CYC017B11	CYC017B11.r	chr13	92.74	179	13	381	559	9322071	9322249	1e-64
ctg1144	CYC017D05	CYC017D05.f	chr16	93.88	49	3	354	402	38569102	38569150	6e-11
ctg1144	CYC017D05	CYC017D05.r	chr9	89.84	246	23	1	246	28474514	28474271	3e-74
ctg1144	CYC019B14	CYC019B14.f	chr13	86.21	145	20	2	146	9272103	9272247	6e-28
ctg1144	CYC019O19	CYC019O19.f	chr13	93.88	49	3	106	154	19433892	19433844	5e-11
ctg1144	CYC023C10	CYC023C10.f	chr22	93.62	47	3	537	583	37667708	37667754	1e-09
ctg1144	CYC023C10	CYC023C10.r	chr14	88.68	53	6	330	382	52615530	52615478	3e-06
ctg1144	CYC025C12	CYC025C12.f	chr13	93.48	92	6	164	255	19352026	19351935	2e-29
ctg1144	CYC025C12	CYC025C12.r	chr13	92.68	41	3	35	75	9630028	9629988	4e-06
ctg1144	CYC028K08	CYC028K08.f	chr9	88.21	246	24	234	478	28571218	28570977	2e-63
ctg1144	CYC029M16	CYC029M16.f	chr13	94.52	292	14	315	606	9836265	9835976	4e-120
ctg1144	CYC029M16	CYC029M16.r	chr13	83.64	654	80	23	662	9630074	9630714	5e-107
ctg1144	CYC039J21	CYC039J21.f	chr14	90.52	116	10	614	729	50880286	50880400	2e-29
ctg1144	CYC044C21	CYC044C21.f	chr14	91.27	126	11	1	126	52709642	52709767	9e-38
ctg1144	CYC044C21	CYC044C21.r	chr17	90.2	51	5	594	644	14634205	14634155	2e-07
ctg1144	CYC044P19	CYC044P19.r	chr1	91.49	47	4	488	534	10746950	10746996	2e-07
ctg1144	CYC049K09	CYC049K09.f	chr14	85.04	127	19	383	509	51434543	51434417	3e-19
ctg1144	CYC049K09	CYC049K09.r	chr14	82.82	163	28	20	182	52544681	52544519	3e-19
ctg1144	CYC050A06	CYC050A06.f	chr9	83.05	177	30	45	221	27988344	27988520	7e-23
ctg1144	CYC050A06	CYC050A06.r	chr9	87.55	249	31	394	642	28232863	28232615	2e-63
ctg1144	CYC050E12	CYC050E12.f	chr14	84.17	120	19	563	682	51484408	51484289	4e-15
ctg1144	CYC050E12	CYC050E12.r	chr14	91.49	47	4	11	57	52544565	52544519	2e-07
ctg1144	CYC051E22	CYC051E22.f	chr9	83.05	177	30	45	221	27988344	27988520	7e-23
ctg1144	CYC051E22	CYC051E22.r	chr9	86.47	340	44	394	732	28232863	28232525	3e-77
ctg1144	CYC051I05	CYC051I05.f	chr13	89.89	267	21	340	600	9722147	9721881	2e-84
ctg1144	CYC051I05	CYC051I05.r	chr20	91.3	46	4	178	223	13325751	13325706	6e-07
ctg1144	CYC063P17	CYC063P17.f	chr5	93.48	46	3	393	438	30965851	30965806	3e-09
ctg1144	CYC071F18	CYC071F18.f	chr13	91.04	67	6	570	636	9765838	9765904	1e-14
ctg1144	CYC071F18	CYC071F18.r	chr13	93.22	118	8	3	120	10151196	10151079	3e-40
ctg1144	CYC082B14	CYC082B14.f	chr13	84.35	115	14	1	111	19454942	19455056	6e-14
ctg1144	CYC082B14	CYC082B14.r	chr13	90.04	472	38	201	669	19914822	19914357	8e-146
ctg1144	CYC082J22	CYC082J22.f	chr13	85.95	427	46	2	425	9666481	9666896	6e-82
ctg1144	CYC082J22	CYC082J22.r	chr13	88.4	776	79	5	778	9861302	9860536	0
ctg1144	CYC089F06	CYC089F06.r	chr9	95	180	9	519	698	28474566	28474387	8e-75
ctg1144	CYC091H15	CYC091H15.f	chr13	82.89	187	24	133	316	19934856	19934675	4e-20
ctg1144	CYC091H15	CYC091H15.r	chr13	87.63	97	11	465	561	19441370	19441465	7e-16
ctg1144	CYC096J09	CYC096J09.f	chr17	94.87	39	2	483	521	36713638	36713600	2e-07
ctg1145	CYC016M16	CYC016M16.f	chr7	84.69	98	15	320	417	58922733	58922636	2e-11
ctg1145	CYC016M16	CYC016M16.r	chr9	98.31	59	1	537	595	4138556	4138498	1e-21
ctg1145	CYC019E23	CYC019E23.r	chr7	85.99	157	21	582	738	59163157	59163312	1e-27
ctg1145	CYC034M10	CYC034M10.f	chr9	98.31	59	1	534	592	4138556	4138498	1e-21
ctg1145	CYC054H05	CYC054H05.f	chr20	81.73	394	67	13	406	33308279	33308667	2e-49
ctg1145	CYC139N22	CYC139N22.f	chr5	89.83	59	6	252	310	14803582	14803524	7e-10
ctg1153	CYC027I11	CYC027I11.f	chr23	88.66	97	11	87	183	28151474	28151570	2e-20
ctg1153	CYC035D18	CYC035D18.f	chr15	89.76	332	32	40	369	20077442	20077773	5e-104
ctg1153	CYC035D18	CYC035D18.r	chr15	96.36	110	4	189	298	20399139	20399030	5e-45
ctg1153	CYC036D01	CYC036D01.f	chr15	92.54	67	5	53	119	19485877	19485943	7e-17
ctg1153	CYC036D01	CYC036D01.r	chr15	88.42	354	32	329	673	19887398	19887045	1e-104
ctg1153	CYC056C14	CYC056C14.r	chr15	88.31	308	32	320	626	19715951	19715647	3e-80
ctg1153	CYC059I08	CYC059I08.f	chr2	91.67	48	4	703	750	16724551	16724598	6e-08
ctg1153	CYC059I08	CYC059I08.r	chr15	97.06	204	4	322	525	20339998	20339797	1e-94
ctg1153	CYC059O16	CYC059O16.f	chr15	92.28	272	21	472	743	19686605	19686334	5e-101
ctg1153	CYC059O16	CYC059O16.r	chr25	96.97	33	1	387	419	23591918	23591886	3e-06
ctg1153	CYC066B14	CYC066B14.f	chr15	82.28	316	56	2	317	19831532	19831217	1e-43
ctg1153	CYC066B14	CYC066B14.r	chr15	86.59	82	10	424	504	19537766	19537847	4e-09
ctg1153	CYC099G23	CYC099G23.f	chr15	93.51	154	10	349	502	20281237	20281390	7e-57
ctg1153	CYC099G23	CYC099G23.r	chr15	83.85	322	25	366	675	20482549	20482243	4e-55
ctg1153	CYC132O08	CYC132O08.r	chr15	92.5	40	3	317	356	19537675	19537714	7e-06
ctg1153	CYC132O23	CYC132O23.f	chr15	89.18	379	39	280	656	19717722	19718100	2e-115
ctg1153	CYC132O23	CYC132O23.r	chr15	91.14	508	33	27	532	20121280	20120783	6e-180
ctg1153	CYC137C19	CYC137C19.r	chr15	88.49	139	16	1	139	19574650	19574788	1e-33
ctg1153	CYC139M24	CYC139M24.f	chr15	86.88	640	56	4	641	20121222	20120609	4e-166
ctg1153	CYC139M24	CYC139M24.r	chr15	94.34	53	3	391	443	27667953	27668005	1e-13
ctg1159	CYC005L16	CYC005L16.f	chr13	95.97	273	8	561	833	29355342	29355073	3e-118
ctg1159	CYC005L16	CYC005L16.r	chr13	94.64	168	9	18	185	29096485	29096652	9e-68
ctg1159	CYC017D07	CYC017D07.f	chr13	90.29	278	22	388	661	28931974	28932250	2e-87
ctg1159	CYC017D07	CYC017D07.r	chr13	91.81	293	17	406	698	29150673	29150388	1e-104
ctg1159	CYC020E07	CYC020E07.f	chr13	94.59	111	6	217	327	28925048	28925158	4e-41
ctg1159	CYC029D24	CYC029D24.f	chr13	94.59	111	6	217	327	28925048	28925158	4e-41
ctg1159	CYC082H23	CYC082H23.f	chr18	88.33	60	7	400	459	24586777	24586836	5e-08
ctg1159	CYC086N03	CYC086N03.f	chr13	94.12	221	13	470	690	28916210	28916430	1e-89
ctg1159	CYC086N03	CYC086N03.r	chr13	86.61	336	34	1	335	29161581	29161256	1e-73
ctg117	CYC008P20	CYC008P20.f	chr13	81.79	335	61	191	525	15597552	15597886	3e-43
ctg117	CYC008P20	CYC008P20.r	chr1	83.56	590	73	15	604	28664548	28663983	8e-115
ctg117	CYC023G08	CYC023G08.f	chr1	86.21	145	16	217	357	28614526	28614382	5e-24
ctg117	CYC023G08	CYC023G08.r	chr1	90.91	55	5	120	174	28305616	28305670	9e-10
ctg117	CYC070C10	CYC070C10.f	chr25	86.29	124	13	504	626	25595067	25594947	1e-15
ctg117	CYC070C10	CYC070C10.r	chr1	84.42	77	12	377	453	7818366	7818442	3e-06
ctg117	CYC087J22	CYC087J22.f	chr24	89.83	59	6	267	325	23515240	23515182	9e-10
ctg117	CYC088I03	CYC088I03.f	chr24	89.83	59	6	267	325	23515240	23515182	1e-09
ctg1174	CYC005M05	CYC005M05.f	chr13	92.06	403	31	137	539	49868152	49868553	1e-150
ctg1174	CYC005M05	CYC005M05.r	chr20	87.44	215	24	1	214	36600164	36600376	1e-48
ctg1174	CYC011C21	CYC011C21.f	chr20	89.41	85	7	232	316	37129430	37129348	3e-13
ctg1174	CYC011C21	CYC011C21.r	chr20	92.16	357	26	1	355	36942016	36942372	3e-133
ctg1174	CYC013F23	CYC013F23.f	chr20	84.23	222	28	8	225	38642355	38642137	5e-30
ctg1174	CYC013F23	CYC013F23.r	chr20	82.29	96	17	242	337	38291273	38291368	1e-05
ctg1174	CYC014A19	CYC014A19.f	chr20	84.47	161	19	342	501	37228666	37228821	6e-20
ctg1174	CYC014A19	CYC014A19.r	chr20	90.31	578	48	97	669	37551638	37551064	0
ctg1174	CYC023C05	CYC023C05.f	chr20	90.11	91	5	716	802	37532135	37532045	5e-21
ctg1174	CYC023C05	CYC023C05.r	chr20	83.84	99	16	571	669	37225656	37225754	9e-10
ctg1174	CYC025A13	CYC025A13.f	chr20	91.88	677	55	1	677	37458412	37457736	0
ctg1174	CYC025A13	CYC025A13.r	chr20	86.3	73	10	255	327	37146055	37146127	1e-08
ctg1174	CYC033M22	CYC033M22.f	chr20	92.5	160	12	443	602	36631144	36631303	1e-55
ctg1174	CYC033M22	CYC033M22.r	chr20	87.12	396	43	301	695	36853752	36853364	3e-99
ctg1174	CYC035P11	CYC035P11.f	chr20	90.4	198	19	1	198	37692461	37692658	7e-54
ctg1174	CYC035P11	CYC035P11.r	chr7	85.03	147	20	487	631	9676004	9676150	3e-22
ctg1174	CYC035P17	CYC035P17.f	chr20	97.8	91	2	160	250	36879314	36879404	2e-38
ctg1174	CYC035P17	CYC035P17.r	chr20	90.22	92	8	181	272	37333798	37333708	6e-20
ctg1174	CYC037J15	CYC037J15.f	chr20	90.98	133	12	370	502	36674040	36674172	1e-39
ctg1174	CYC037J15	CYC037J15.r	chr20	90	100	9	498	597	36980782	36980684	2e-22
ctg1174	CYC038C01	CYC038C01.f	chr20	87.5	96	12	670	765	38105356	38105451	2e-17
ctg1174	CYC038C01	CYC038C01.r	chr20	88.15	346	36	425	770	38253851	38253511	2e-97
ctg1174	CYC039O21	CYC039O21.f	chr22	92.23	515	27	325	839	6753577	6754078	0
ctg1174	CYC039O21	CYC039O21.r	chr20	89.16	166	18	23	188	36873487	36873652	5e-45
ctg1174	CYC047O12	CYC047O12.f	chr4	82.95	129	22	327	455	13557360	13557232	2e-13
ctg1174	CYC047O12	CYC047O12.r	chr20	83.55	152	20	8	159	38584901	38584755	6e-17
ctg1174	CYC048C18	CYC048C18.f	chr15	93.24	74	5	630	703	20036231	20036304	4e-21
ctg1174	CYC049A22	CYC049A22.f	chr20	88.89	135	9	174	308	37125326	37125454	3e-34
ctg1174	CYC054F08	CYC054F08.f	chr20	89.41	85	7	232	316	37129430	37129348	2e-13
ctg1174	CYC054F08	CYC054F08.r	chr20	90.65	246	23	1	246	36854049	36854294	9e-81
ctg1174	CYC063A03	CYC063A03.f	chr20	89.98	539	53	183	721	37300116	37299579	3e-179
ctg1174	CYC063A03	CYC063A03.r	chr20	94.21	121	6	443	563	37152726	37152845	5e-42
ctg1174	CYC064B18	CYC064B18.f	chr20	85.11	188	15	611	785	38379528	38379341	5e-36
ctg1174	CYC064B18	CYC064B18.r	chr20	88.17	355	30	253	595	38175660	38176014	1e-95
ctg1174	CYC066F01	CYC066F01.f	chr20	91.82	758	62	1	758	37544548	37543791	0
ctg1174	CYC066F01	CYC066F01.r	chr8	100	34	0	176	209	37003835	37003802	3e-09
ctg1174	CYC068C11	CYC068C11.f	chr20	93.03	244	8	194	435	37547687	37547923	2e-90
ctg1174	CYC068D03	CYC068D03.f	chr20	88.89	135	9	174	308	37125326	37125454	3e-34
ctg1174	CYC068D03	CYC068D03.r	chr20	84.62	377	57	72	447	37464651	37464275	5e-73
ctg1174	CYC071G16	CYC071G16.f	chr20	84.88	377	56	71	446	37464651	37464275	2e-75
ctg1174	CYC071G16	CYC071G16.r	chr20	88.89	135	9	124	258	37125326	37125454	2e-34
ctg1174	CYC073A02	CYC073A02.f	chr20	91.07	56	5	312	367	38491017	38490962	2e-10
ctg1174	CYC074B12	CYC074B12.f	chr7	81.1	381	55	335	712	37454787	37454421	1e-36
ctg1174	CYC074D10	CYC074D10.f	chr18	85.32	109	13	518	625	39187278	39187384	1e-11
ctg1174	CYC074D10	CYC074D10.r	chr18	95.31	64	3	564	627	39210166	39210103	6e-20
ctg1174	CYC074P08	CYC074P08.f	chr20	90.45	220	21	514	733	37820904	37821123	5e-70
ctg1174	CYC074P08	CYC074P08.r	chr2	86.13	137	19	429	565	28632360	28632496	2e-25
ctg1174	CYC095D14	CYC095D14.f	chr20	90.19	214	14	6	219	38103590	38103384	1e-67
ctg1174	CYC095D14	CYC095D14.r	chr20	87.22	180	20	114	293	37719322	37719498	2e-37
ctg1174	CYC100B11	CYC100B11.r	chr20	91.13	665	56	3	664	37544491	37545155	0
ctg1174	CYC137J08	CYC137J08.f	chr20	86.89	122	16	315	436	37232294	37232173	2e-23
ctg1174	CYC137J08	CYC137J08.r	chr4	93.33	45	3	421	465	11918025	11918069	1e-08
ctg1174	CYC139P03	CYC139P03.f	chr20	87.11	256	30	180	435	36900796	36901048	1e-58
ctg1174	CYC139P03	CYC139P03.r	chr3	100	28	0	53	80	28806750	28806777	4e-06
ctg1176	CYC005M20	CYC005M20.f	chr6	97.06	34	1	596	629	10462488	10462455	9e-07
ctg1176	CYC005M20	CYC005M20.r	chr2	82.11	190	21	540	716	7769267	7769456	6e-20
ctg1176	CYC006A13	CYC006A13.f	chr4	92.71	192	14	629	820	10572076	10572267	5e-70
ctg1176	CYC006G08	CYC006G08.f	chr7	81.71	164	30	107	270	32054860	32055023	3e-15
ctg1176	CYC006G08	CYC006G08.r	chr7	87.27	275	23	1	263	32364973	32364699	1e-70
ctg1176	CYC007E19	CYC007E19.f	chr4	86.49	74	5	247	320	10621916	10621848	4e-09
ctg1176	CYC007E19	CYC007E19.r	chr4	90.6	319	26	334	651	10418780	10419095	4e-101
ctg1176	CYC007F19	CYC007F19.f	chr4	90.94	276	25	448	723	10500163	10500438	7e-94
ctg1176	CYC007F19	CYC007F19.r	chr2	96.97	33	1	354	386	47898718	47898750	3e-06
ctg1176	CYC008K09	CYC008K09.f	chr7	90.13	375	36	27	400	32575257	32574883	6e-122
ctg1176	CYC008K09	CYC008K09.r	chr7	88.32	137	16	31	167	32370855	32370991	1e-32
ctg1176	CYC009N22	CYC009N22.f	chr7	89.08	119	13	91	209	32587473	32587355	6e-29
ctg1176	CYC012C22	CYC012C22.f	chr2	80.74	353	59	382	727	8048004	8047654	1e-21
ctg1176	CYC012C22	CYC012C22.r	chr2	88.31	231	24	152	380	7671365	7671594	6e-63
ctg1176	CYC030J01	CYC030J01.r	chr4	86.49	74	5	246	319	10621916	10621848	4e-09
ctg1176	CYC030P23	CYC030P23.f	chr2	82.12	151	27	296	446	8048004	8047854	1e-14
ctg1176	CYC030P23	CYC030P23.r	chr2	88.36	146	16	419	564	7739116	7739260	4e-33
ctg1176	CYC033B10	CYC033B10.f	chr6	97.06	34	1	596	629	10462488	10462455	9e-07
ctg1176	CYC037G03	CYC037G03.f	chr4	96.2	79	2	721	799	10504254	10504177	2e-26
ctg1176	CYC037G03	CYC037G03.r	chr4	98.06	103	2	310	412	10326539	10326641	1e-45
ctg1176	CYC041B12	CYC041B12.f	chr4	89.57	211	22	74	284	11087658	11087448	3e-62
ctg1176	CYC041B12	CYC041B12.r	chr4	90.82	98	9	638	735	10954090	10954187	7e-26
ctg1176	CYC043J03	CYC043J03.f	chr3	90.48	63	6	101	163	14159473	14159411	4e-12
ctg1176	CYC043J03	CYC043J03.r	chr7	88.27	196	23	440	635	32495104	32494909	5e-51
ctg1176	CYC046E12	CYC046E12.f	chr2	87.5	88	11	52	139	7956908	7956995	4e-15
ctg1176	CYC046E12	CYC046E12.r	chr2	87.67	73	9	339	411	8266806	8266734	6e-11
ctg1176	CYC047M08	CYC047M08.r	chr4	89.77	176	17	1	175	11060398	11060223	1e-48
ctg1176	CYC050H09	CYC050H09.f	chr2	86.49	111	14	506	616	8424819	8424710	6e-17
ctg1176	CYC050L17	CYC050L17.f	chr4	98.06	103	2	310	412	10326539	10326641	1e-45
ctg1176	CYC060N17	CYC060N17.f	chr4	86.15	231	28	527	757	10266238	10266464	9e-47
ctg1176	CYC060N17	CYC060N17.r	chr4	92.07	164	13	81	244	10545196	10545033	9e-56
ctg1176	CYC062K09	CYC062K09.f	chr7	89.09	165	17	527	690	32658607	32658443	5e-42
ctg1176	CYC062K09	CYC062K09.r	chr14	88.64	88	7	151	238	20512521	20512605	2e-16
ctg1176	CYC065J15	CYC065J15.f	chr7	84.99	773	94	20	784	32396660	32395902	2e-162
ctg1176	CYC069K05	CYC069K05.f	chr4	90.91	55	4	227	280	4047938	4047992	2e-07
ctg1176	CYC072H22	CYC072H22.f	chr7	89.09	165	17	527	690	32658607	32658443	6e-42
ctg1176	CYC082B16	CYC082B16.f	chr2	88.04	301	30	1	295	8115053	8114753	3e-74
ctg1176	CYC082B16	CYC082B16.r	chr2	88.03	117	11	661	774	7938229	7938113	4e-21
ctg1176	CYC083L12	CYC083L12.f	chr4	93.48	46	3	397	442	11080295	11080250	4e-09
ctg1176	CYC086C08	CYC086C08.f	chr7	86.97	330	34	81	409	32215145	32214824	1e-76
ctg1176	CYC087N23	CYC087N23.r	chr4	91.28	149	12	51	199	10313120	10312973	2e-44
ctg1176	CYC090M24	CYC090M24.f	chr1	88.73	71	8	484	554	35668598	35668668	3e-12
ctg1176	CYC090M24	CYC090M24.r	chr15	86.9	84	9	36	117	37776391	37776308	2e-11
ctg1176	CYC131N09	CYC131N09.r	chr7	88.71	124	8	6	129	31914850	31914967	1e-30
ctg1176	CYC132A08	CYC132A08.r	chr7	94.41	179	10	193	371	32446438	32446260	4e-72
ctg1176	CYC136M11	CYC136M11.f	chr4	88.57	70	8	165	234	10163661	10163730	5e-12
ctg1176	CYC136M11	CYC136M11.r	chr8	90.32	62	5	355	416	20798785	20798845	2e-09
ctg118	CYC010O06	CYC010O06.f	chr21	83.82	136	14	1	135	33384489	33384617	2e-16
ctg118	CYC010O06	CYC010O06.r	chr21	92.2	295	22	52	345	33692699	33692405	1e-107
ctg118	CYC013F22	CYC013F22.f	chr21	90.62	96	9	474	569	33063551	33063646	1e-24
ctg118	CYC013F22	CYC013F22.r	chr21	92.12	609	33	1	609	33423787	33423194	0
ctg118	CYC013I05	CYC013I05.r	chr16	97.06	34	1	490	523	33420877	33420844	9e-07
ctg118	CYC014N14	CYC014N14.f	chr2	97.22	36	1	671	706	2846529	2846494	6e-08
ctg118	CYC014N14	CYC014N14.r	chr21	95.56	45	2	5	49	37993611	37993567	5e-11
ctg118	CYC017D14	CYC017D14.r	chr21	91.07	56	4	497	551	33546096	33546041	6e-08
ctg118	CYC020D13	CYC020D13.r	chr21	90.22	184	17	100	283	32814726	32814544	2e-53
ctg118	CYC021C21	CYC021C21.f	chr21	86.24	189	13	16	203	37760219	37760395	2e-41
ctg118	CYC021C21	CYC021C21.r	chr21	88.18	203	24	2	204	37943529	37943327	9e-53
ctg118	CYC027F04	CYC027F04.f	chr19	88.68	53	6	290	342	42855418	42855470	4e-06
ctg118	CYC027F04	CYC027F04.r	chr7	83.83	167	27	407	573	52623850	52623684	4e-24
ctg118	CYC028I13	CYC028I13.f	chr22	88.89	54	6	181	234	23893784	23893837	6e-07
ctg118	CYC028I13	CYC028I13.r	chr3	92.31	52	3	154	205	21111355	21111305	6e-08
ctg118	CYC035C07	CYC035C07.f	chr21	92.95	298	20	527	824	33457322	33457618	2e-106
ctg118	CYC035C07	CYC035C07.r	chr8	100	34	0	442	475	37003835	37003802	4e-09
ctg118	CYC045B01	CYC045B01.r	chr21	91.61	155	13	1	155	33454089	33454243	2e-50
ctg118	CYC046M15	CYC046M15.f	chr5	90.91	77	7	649	725	24912766	24912842	4e-18
ctg118	CYC046M15	CYC046M15.r	chr21	90	90	9	1	90	33141658	33141569	5e-21
ctg118	CYC050J07	CYC050J07.f	chr3	92.31	52	3	164	215	21111355	21111305	6e-08
ctg118	CYC050J07	CYC050J07.r	chr21	91.24	194	17	562	755	32823323	32823516	5e-64
ctg118	CYC051P12	CYC051P12.f	chr3	84.56	136	21	411	546	53216828	53216963	6e-20
ctg118	CYC051P12	CYC051P12.r	chr21	86.97	422	45	322	734	33468603	33468183	2e-115
ctg118	CYC055H11	CYC055H11.f	chr7	90.76	119	11	345	463	52517537	52517419	1e-33
ctg118	CYC060G24	CYC060G24.f	chr21	83.44	157	22	191	347	33095134	33094982	7e-20
ctg118	CYC060G24	CYC060G24.r	chr19	88.31	77	9	302	378	12455093	12455169	2e-13
ctg118	CYC066A19	CYC066A19.f	chr21	83	200	34	164	363	38061131	38060932	4e-27
ctg118	CYC066A19	CYC066A19.r	chr19	89.09	55	6	315	369	33343750	33343804	2e-07
ctg118	CYC068O10	CYC068O10.r	chr7	86.24	109	14	106	214	18930005	18929898	1e-15
ctg118	CYC074K08	CYC074K08.f	chr21	91.8	183	15	296	478	38119793	38119611	3e-62
ctg118	CYC082B20	CYC082B20.r	chr9	87.69	65	8	67	131	10256508	10256444	9e-09
ctg118	CYC083E22	CYC083E22.f	chr21	88.11	185	22	22	206	32906029	32905845	8e-47
ctg118	CYC083E22	CYC083E22.r	chr23	89.02	82	9	220	301	1177307	1177388	2e-16
ctg118	CYC089N14	CYC089N14.r	chr21	88.64	308	29	37	338	33702245	33702552	5e-90
ctg118	CYC095G03	CYC095G03.f	chr21	96.53	173	5	1	173	33321458	33321287	4e-76
ctg118	CYC095G03	CYC095G03.r	chr21	91.16	147	12	2	147	33692551	33692405	2e-43
ctg118	CYC095J05	CYC095J05.r	chr21	90.97	155	14	377	531	37784898	37784744	5e-48
ctg118	CYC098L10	CYC098L10.r	chr21	90.85	153	14	461	613	32969462	32969614	8e-47
ctg118	CYC100C22	CYC100C22.r	chr7	84.76	164	24	347	509	52588247	52588084	8e-25
ctg118	CYC135A04	CYC135A04.r	chr13	100	36	0	450	485	42768290	42768325	2e-10
ctg1186	CYC006G20	CYC006G20.f	chr18	87.69	260	31	29	287	13606495	13606754	3e-65
ctg1186	CYC006G20	CYC006G20.r	chr18	98.95	95	1	83	177	13912625	13912531	2e-43
ctg1186	CYC045C21	CYC045C21.r	chr18	83.41	223	30	249	464	13533407	13533629	7e-35
ctg1186	CYC074E05	CYC074E05.f	chr9	94.59	37	2	434	470	10211367	10211331	3e-06
ctg1186	CYC074E05	CYC074E05.r	chr18	88.75	80	8	498	577	13925476	13925554	1e-12
ctg1186	CYC099M08	CYC099M08.r	chr18	88.81	143	16	274	416	14032901	14032759	4e-36
ctg1186	CYC137I20	CYC137I20.f	chr3	91.67	48	4	280	327	53221532	53221579	5e-08
ctg1186	CYC137I20	CYC137I20.r	chr21	93.18	44	3	5	48	41987119	41987162	4e-08
ctg1203	CYC009L11	CYC009L11.r	chr5	97.67	43	1	468	510	70755825	70755867	4e-12
ctg1203	CYC013G06	CYC013G06.f	chr23	90.91	77	7	2	78	21619550	21619626	7e-19
ctg1203	CYC026B15	CYC026B15.f	chr1	89.67	184	19	530	713	32076310	32076493	3e-53
ctg1203	CYC026B15	CYC026B15.r	chr20	92.16	51	4	513	563	28908778	28908728	1e-09
ctg1203	CYC026L02	CYC026L02.f	chr4	94.55	55	3	403	457	17707467	17707521	2e-14
ctg1203	CYC026L02	CYC026L02.r	chr1	85.42	144	20	14	156	31886929	31887072	3e-22
ctg1203	CYC028K03	CYC028K03.f	chr19	86.4	125	16	422	546	1379047	1378924	2e-20
ctg1203	CYC028K03	CYC028K03.r	chr19	87.13	101	13	559	659	1599273	1599173	4e-18
ctg1203	CYC029G10	CYC029G10.f	chr19	93.04	115	8	183	297	1826195	1826081	2e-38
ctg1203	CYC029G10	CYC029G10.r	chr13	88.1	84	10	331	414	38174296	38174213	3e-15
ctg1203	CYC034J03	CYC034J03.f	chr19	85.19	108	14	183	290	1724582	1724477	2e-13
ctg1203	CYC034J03	CYC034J03.r	chr3	92.96	71	5	20	90	57250953	57250883	3e-19
ctg1203	CYC034L17	CYC034L17.r	chr19	85.6	125	17	382	506	1379047	1378924	3e-18
ctg1203	CYC039B24	CYC039B24.f	chr12	97.3	37	1	192	228	44575185	44575221	5e-09
ctg1203	CYC039B24	CYC039B24.r	chr3	91.36	81	6	608	687	34634957	34634877	4e-18
ctg1203	CYC040E24	CYC040E24.f	chr10	90	50	5	294	343	21178378	21178329	6e-07
ctg1203	CYC040G02	CYC040G02.f	chr1	92.5	80	5	35	113	32074598	32074677	7e-20
ctg1203	CYC040G02	CYC040G02.r	chr1	87.89	545	66	223	767	32244353	32243809	1e-156
ctg1203	CYC062D13	CYC062D13.f	chr19	89.47	114	11	295	408	1142430	1142542	4e-26
ctg1203	CYC062G19	CYC062G19.f	chr1	90.57	53	4	401	453	9560558	9560609	3e-06
ctg1203	CYC062G19	CYC062G19.r	chr19	80.77	130	25	89	218	1529752	1529623	8e-07
ctg1203	CYC087A10	CYC087A10.f	chr19	86.79	212	26	1	210	1173914	1174125	8e-44
ctg1213	CYC009O15	CYC009O15.f	chr7	96.81	94	3	472	565	37397719	37397626	8e-38
ctg1213	CYC009O15	CYC009O15.r	chr7	90.18	713	50	37	746	37251182	37251877	0
ctg1213	CYC009O24	CYC009O24.f	chr2	84.54	97	15	147	243	25127571	25127475	6e-11
ctg1213	CYC009O24	CYC009O24.r	chr7	95.74	47	2	195	241	65560112	65560158	3e-12
ctg1213	CYC011O04	CYC011O04.f	chr7	92.11	342	15	1	342	37087999	37087670	1e-129
ctg1213	CYC011O04	CYC011O04.r	chr7	80.3	269	46	48	314	36860522	36860785	4e-15
ctg1213	CYC014M23	CYC014M23.f	chr7	94.56	478	23	26	500	36974512	36974035	0
ctg1213	CYC015N24	CYC015N24.f	chr7	86.11	108	15	291	398	36663005	36663112	2e-17
ctg1213	CYC015N24	CYC015N24.r	chr7	95.9	195	8	477	671	36846301	36846107	4e-86
ctg1213	CYC020L01	CYC020L01.r	chr7	95.24	63	3	54	116	37132143	37132081	2e-19
ctg1213	CYC027C15	CYC027C15.f	chr7	91.3	69	6	199	267	36559459	36559527	1e-15
ctg1213	CYC055C10	CYC055C10.f	chr7	95.24	210	8	462	670	36620084	36620292	2e-85
ctg1213	CYC055C10	CYC055C10.r	chr7	83.11	148	16	513	660	36841914	36841776	6e-17
ctg1213	CYC075E22	CYC075E22.f	chr7	99.01	202	2	1	202	36970876	36971077	1e-104
ctg1213	CYC077I24	CYC077I24.f	chr7	90.56	360	28	1	356	37277592	37277235	3e-114
ctg1213	CYC077M21	CYC077M21.f	chr13	100	30	0	557	586	38943378	38943349	9e-07
ctg1213	CYC084G04	CYC084G04.f	chr7	89.65	657	41	29	679	37088028	37088663	0
ctg1213	CYC084G04	CYC084G04.r	chr7	90.7	344	22	1	344	35882457	35882790	7e-118
ctg1213	CYC091I14	CYC091I14.f	chr7	90.52	211	20	210	420	36747423	36747213	4e-67
ctg122	CYC016A07	CYC016A07.f	chr11	97.22	36	1	524	559	23124831	23124796	5e-08
ctg122	CYC016A07	CYC016A07.r	chr24	90.7	129	12	1	129	13743888	13743760	3e-37
ctg122	CYC019L20	CYC019L20.r	chr24	94.58	295	16	297	591	13955953	13955659	8e-127
ctg122	CYC022C08	CYC022C08.f	chr15	83.49	327	44	70	396	6301464	6301780	4e-55
ctg122	CYC033D04	CYC033D04.r	chr16	89.83	59	6	356	414	8237941	8237883	8e-10
ctg122	CYC035P12	CYC035P12.f	chr4	91.11	45	4	172	216	25556805	25556849	1e-06
ctg122	CYC036L21	CYC036L21.f	chr21	83.05	118	20	180	297	7758957	7759074	2e-11
ctg122	CYC036L21	CYC036L21.r	chr24	90.7	129	12	1	129	13743888	13743760	3e-37
ctg122	CYC037N09	CYC037N09.f	chr19	97.06	34	1	150	183	27677870	27677837	9e-07
ctg122	CYC037N09	CYC037N09.r	chr15	83.46	133	17	135	266	6697680	6697552	9e-13
ctg122	CYC045E11	CYC045E11.f	chr24	85.4	767	65	99	851	13995620	13994887	0
ctg122	CYC045E11	CYC045E11.r	chr20	90	60	6	350	409	46443997	46443938	3e-10
ctg122	CYC049J02	CYC049J02.f	chr15	96.05	177	6	170	345	6231083	6231259	2e-75
ctg122	CYC064E20	CYC064E20.f	chr24	84.24	165	10	276	439	13909999	13909850	4e-26
ctg122	CYC064E20	CYC064E20.r	chr21	83.05	118	20	180	297	7758957	7759074	1e-11
ctg122	CYC068O06	CYC068O06.f	chr24	92.91	127	8	1	126	13722408	13722282	9e-41
ctg122	CYC073A16	CYC073A16.r	chr15	86.9	84	11	49	132	6539935	6540018	8e-13
ctg122	CYC074P16	CYC074P16.f	chr24	92.45	53	4	630	682	13430860	13430912	6e-11
ctg122	CYC074P16	CYC074P16.r	chr24	93.08	130	9	1	130	13722411	13722282	5e-45
ctg122	CYC076M04	CYC076M04.f	chr15	82.03	217	27	117	321	6544213	6544429	2e-26
ctg122	CYC076M04	CYC076M04.r	chr16	89.83	59	6	334	392	8237941	8237883	9e-10
ctg122	CYC078B10	CYC078B10.r	chr24	82.83	198	29	297	493	13620624	13620817	6e-20
ctg122	CYC081K07	CYC081K07.f	chr3	90.2	51	5	516	566	16563001	16562951	2e-07
ctg122	CYC081K07	CYC081K07.r	chr5	86.25	80	11	48	127	39846715	39846636	2e-10
ctg122	CYC087I12	CYC087I12.r	chr15	89.6	125	9	409	529	6092816	6092940	6e-32
ctg122	CYC092P03	CYC092P03.f	chr11	91.53	59	5	432	490	20568706	20568764	4e-12
ctg122	CYC095J17	CYC095J17.f	chr8	83.33	138	23	53	190	38586852	38586989	2e-16
ctg122	CYC099D07	CYC099D07.f	chr19	82.76	145	14	573	716	40883503	40883637	2e-16
ctg122	CYC099D07	CYC099D07.r	chr12	90.57	53	5	462	514	26815741	26815793	1e-08
ctg122	CYC137A15	CYC137A15.f	chr10	85.9	78	11	408	485	14546146	14546069	4e-09
ctg1222	CYC017G03	CYC017G03.f	chr2	92.16	510	39	78	587	9975515	9976023	0
ctg1222	CYC017G03	CYC017G03.r	chr17	88.03	117	13	375	491	16084205	16084320	6e-23
ctg1222	CYC036I08	CYC036I08.f	chr7	86.49	74	10	205	278	43368242	43368169	3e-09
ctg1222	CYC036I08	CYC036I08.r	chr2	87.05	139	18	28	166	10220287	10220425	5e-29
ctg1222	CYC066J06	CYC066J06.r	chr5	90.24	82	8	383	464	52875028	52875109	9e-19
ctg1222	CYC067K04	CYC067K04.f	chr5	92.59	54	4	602	655	34819246	34819299	1e-11
ctg1222	CYC134J13	CYC134J13.f	chr14	88.41	69	8	64	132	42208260	42208328	2e-11
ctg1226	CYC033G07	CYC033G07.f	chr11	93.44	61	4	1	61	43461499	43461439	1e-15
ctg1226	CYC033G07	CYC033G07.r	chr10	95.83	48	2	656	703	21251546	21251499	9e-13
ctg1226	CYC035B23	CYC035B23.f	chr10	82.05	156	14	45	186	21196980	21196825	1e-11
ctg1226	CYC037O07	CYC037O07.f	chr10	86.71	158	21	377	534	21378023	21378180	5e-33
ctg1226	CYC037O07	CYC037O07.r	chr10	90.48	63	5	64	126	21204647	21204708	7e-10
ctg1226	CYC038L04	CYC038L04.f	chr10	95.68	162	7	108	269	21015270	21015431	7e-69
ctg1226	CYC038L04	CYC038L04.r	chr10	84.16	385	45	3	381	21142683	21142309	1e-76
ctg1226	CYC040H11	CYC040H11.r	chr10	88.78	205	20	232	434	21366442	21366645	4e-49
ctg1226	CYC056K22	CYC056K22.f	chr10	83.65	208	33	46	252	21551849	21552056	2e-29
ctg1226	CYC058C17	CYC058C17.f	chr10	93.42	319	21	166	484	21891561	21891243	3e-129
ctg1226	CYC058C17	CYC058C17.r	chr10	87.56	217	27	493	709	21529995	21530211	6e-54
ctg1226	CYC066C01	CYC066C01.f	chr10	90.83	469	35	83	545	21054516	21054982	5e-153
ctg1226	CYC066C01	CYC066C01.r	chr2	93.02	43	3	643	685	35156507	35156465	2e-07
ctg1226	CYC082O24	CYC082O24.r	chr10	89.58	48	5	10	57	21377854	21377901	1e-06
ctg1227	CYC016C02	CYC016C02.r	chr23	90	50	5	224	273	32969682	32969731	4e-07
ctg1227	CYC017B22	CYC017B22.r	chr1	96.74	92	3	62	153	5088286	5088377	1e-36
ctg1227	CYC019I03	CYC019I03.f	chr23	85.19	405	35	159	561	33114716	33114335	2e-90
ctg1227	CYC019I03	CYC019I03.r	chr24	94.64	56	2	60	115	9707022	9707076	9e-13
ctg1227	CYC030G10	CYC030G10.r	chr7	85.37	287	38	21	306	50631939	50631656	2e-50
ctg1227	CYC031E03	CYC031E03.f	chr1	90.79	391	25	233	612	5335030	5334640	8e-137
ctg1227	CYC031E03	CYC031E03.r	chr1	88.41	233	27	300	532	5129001	5129233	2e-63
ctg1227	CYC035N17	CYC035N17.f	chr7	90.1	101	10	334	434	50244056	50244156	3e-25
ctg1227	CYC035N17	CYC035N17.r	chr8	95.24	42	2	448	489	22661313	22661354	3e-09
ctg1227	CYC036L03	CYC036L03.r	chr7	100	29	0	159	187	69742151	69742123	3e-06
ctg1227	CYC043A05	CYC043A05.f	chr7	87.41	278	28	2	278	50904773	50904502	1e-69
ctg1227	CYC043A05	CYC043A05.r	chr12	81.82	198	31	309	502	10786907	10787103	4e-15
ctg1227	CYC050C23	CYC050C23.f	chr7	89.41	255	25	103	357	50801345	50801597	9e-75
ctg1227	CYC050C23	CYC050C23.r	chr7	87.83	189	22	515	702	51011705	51011517	2e-44
ctg1227	CYC052B14	CYC052B14.f	chr1	91.5	647	46	17	661	5346583	5347222	0
ctg1227	CYC052B14	CYC052B14.r	chr1	88.51	148	15	261	406	5531494	5531347	7e-32
ctg1227	CYC057N15	CYC057N15.r	chr23	89.07	183	19	406	588	33055848	33055667	6e-48
ctg1227	CYC058D21	CYC058D21.f	chr23	93.68	95	6	152	246	33033098	33033004	3e-31
ctg1227	CYC058D21	CYC058D21.r	chr23	89.92	119	12	227	345	32764601	32764719	3e-31
ctg1227	CYC059K14	CYC059K14.f	chr7	86.15	65	9	26	90	52078966	52079030	3e-06
ctg1227	CYC059K14	CYC059K14.r	chr7	89.6	202	19	382	582	50984769	50984569	1e-54
ctg1227	CYC060F02	CYC060F02.f	chr13	97.06	34	1	313	346	38194731	38194698	9e-07
ctg1227	CYC061O04	CYC061O04.f	chr1	87.24	196	25	8	203	5292629	5292434	3e-46
ctg1227	CYC064P20	CYC064P20.f	chr1	92.98	413	29	66	478	5289872	5290284	4e-166
ctg1227	CYC069P21	CYC069P21.f	chr23	89.55	220	23	216	435	32899020	32899239	3e-65
ctg1227	CYC070A24	CYC070A24.f	chr23	91.53	189	16	7	195	32891585	32891773	2e-63
ctg1227	CYC078P02	CYC078P02.f	chr1	89.93	149	15	257	405	5013495	5013643	5e-42
ctg1227	CYC078P02	CYC078P02.r	chr1	97.01	201	6	223	423	5261585	5261385	1e-94
ctg1227	CYC079K15	CYC079K15.f	chr25	90.74	54	5	359	412	20737095	20737148	3e-09
ctg1227	CYC080B21	CYC080B21.f	chr1	86.26	262	33	463	723	5568317	5568058	4e-52
ctg1227	CYC083B08	CYC083B08.f	chr25	81.02	137	26	141	277	13294409	13294273	5e-09
ctg1227	CYC083B08	CYC083B08.r	chr1	92.45	159	12	408	566	5200692	5200534	4e-55
ctg1227	CYC092P05	CYC092P05.f	chr23	85.64	195	20	198	392	32598562	32598748	3e-34
ctg1227	CYC092P05	CYC092P05.r	chr23	100	30	0	91	120	32927245	32927216	6e-07
ctg1227	CYC096A06	CYC096A06.f	chr23	88.07	109	13	428	536	32944298	32944190	7e-23
ctg1227	CYC096A06	CYC096A06.r	chr23	86.28	226	31	477	702	32576081	32576306	9e-50
ctg1227	CYC096C19	CYC096C19.f	chr1	94.31	123	5	667	787	5160315	5160193	9e-41
ctg1227	CYC096C19	CYC096C19.r	chr1	89.02	82	9	588	669	4969391	4969472	2e-16
ctg1227	CYC096O12	CYC096O12.f	chr1	86.36	88	12	580	667	5846866	5846779	8e-13
ctg1227	CYC096O12	CYC096O12.r	chr1	88.73	275	31	129	403	5595095	5595369	3e-79
ctg1227	CYC099P14	CYC099P14.f	chr7	90.14	355	35	195	549	50721066	50720712	3e-117
ctg1227	CYC132P24	CYC132P24.f	chr23	86.36	286	31	205	482	33140788	33140503	2e-65
ctg1227	CYC132P24	CYC132P24.r	chr23	91.96	112	9	225	336	32957918	32958029	3e-34
ctg1227	CYC136E01	CYC136E01.f	chr1	89.68	252	22	217	464	5615969	5615718	1e-73
ctg1227	CYC136E01	CYC136E01.r	chr1	86.36	66	9	289	354	5356301	5356366	4e-07
ctg1227	CYC137D10	CYC137D10.f	chr14	94.78	134	7	1	134	15170268	15170401	4e-52
ctg1227	CYC137D10	CYC137D10.r	chr1	91.67	156	13	146	301	5745480	5745325	6e-51
ctg1227	CYC139G10	CYC139G10.r	chr1	93.37	196	13	64	259	5488495	5488300	3e-75
ctg1234	CYC004F12	CYC004F12.f	chr17	92.86	42	3	414	455	8490025	8489984	9e-07
ctg1234	CYC011F13	CYC011F13.f	chr5	84.31	204	27	488	691	36333540	36333738	4e-24
ctg1234	CYC011F13	CYC011F13.r	chr5	92.71	247	18	143	389	36609298	36609052	2e-93
ctg1234	CYC011J07	CYC011J07.f	chr5	86.98	169	22	94	262	36114940	36115108	3e-37
ctg1234	CYC011J07	CYC011J07.r	chr8	85.83	120	17	221	340	1996427	1996308	4e-20
ctg1234	CYC029C14	CYC029C14.r	chr22	88.48	191	20	123	312	13178066	13177877	1e-45
ctg1234	CYC032G15	CYC032G15.f	chr22	81.58	342	63	463	804	13073503	13073162	1e-42
ctg1234	CYC033D03	CYC033D03.f	chr5	100	99	0	1	99	36256519	36256421	6e-48
ctg1234	CYC033D03	CYC033D03.r	chr5	87.91	215	25	61	274	35902203	35902417	1e-52
ctg1234	CYC035E09	CYC035E09.r	chr5	87.95	307	37	258	564	36034192	36033886	9e-84
ctg1234	CYC041C17	CYC041C17.f	chr4	89.53	86	9	473	558	3278672	3278587	1e-18
ctg1234	CYC041C17	CYC041C17.r	chr5	89.26	149	16	32	180	15741562	15741414	1e-39
ctg1234	CYC041E15	CYC041E15.r	chr15	87.26	157	20	599	755	46864642	46864486	8e-35
ctg1234	CYC041G07	CYC041G07.r	chr5	90.38	52	5	217	268	19808787	19808736	5e-08
ctg1234	CYC041I05	CYC041I05.f	chr13	90.41	73	6	613	684	45225341	45225413	2e-13
ctg1234	CYC041I05	CYC041I05.r	chr12	92.33	326	23	176	499	45534003	45534328	5e-122
ctg1234	CYC041I07	CYC041I07.f	chr22	95.24	42	2	37	78	13273279	13273238	3e-09
ctg1234	CYC041I15	CYC041I15.f	chr22	84.03	238	35	407	641	17745961	17745724	5e-36
ctg1234	CYC041O19	CYC041O19.f	chr21	89.44	142	14	617	757	16162183	16162324	2e-35
ctg1234	CYC041O19	CYC041O19.r	chr1	86.15	390	54	205	594	22360679	22360290	1e-92
ctg1234	CYC044G15	CYC044G15.r	chr22	90.09	111	11	62	172	13032075	13032185	6e-29
ctg1234	CYC047D22	CYC047D22.f	chr22	93.75	48	3	465	512	12794561	12794608	2e-10
ctg1234	CYC056K19	CYC056K19.f	chr5	89.61	77	8	264	340	35850286	35850362	8e-16
ctg1234	CYC056K19	CYC056K19.r	chr5	86.49	148	9	99	246	36112618	36112482	2e-30
ctg1234	CYC066P05	CYC066P05.f	chr22	84.95	93	14	541	633	13001645	13001553	6e-11
ctg1234	CYC066P05	CYC066P05.r	chr16	90.7	86	7	354	438	36987103	36987188	1e-18
ctg1234	CYC079D19	CYC079D19.f	chr23	86.15	65	9	335	399	22852020	22851956	3e-06
ctg1234	CYC079D19	CYC079D19.r	chr5	83.61	183	30	20	202	36034488	36034670	2e-26
ctg1234	CYC082F22	CYC082F22.f	chr5	87.43	191	24	303	493	36214376	36214566	1e-45
ctg1234	CYC082F22	CYC082F22.r	chr8	85.83	120	17	223	342	1996427	1996308	6e-20
ctg1234	CYC087C11	CYC087C11.r	chr22	87.4	127	5	287	403	13116705	13116580	4e-27
ctg1234	CYC091I20	CYC091I20.r	chr4	89.87	79	8	203	281	7097244	7097322	6e-17
ctg1234	CYC099P03	CYC099P03.f	chr16	90	50	5	762	811	1345701	1345750	1e-06
ctg1234	CYC099P03	CYC099P03.r	chr22	84.25	127	14	421	541	13130066	13130192	1e-14
ctg1234	CYC136B05	CYC136B05.f	chr5	90.82	98	9	91	188	36604117	36604020	6e-26
ctg1234	CYC136B06	CYC136B06.f	chr5	100	44	0	114	157	36603922	36603879	8e-16
ctg1241	CYC008J24	CYC008J24.f	chr1	88.61	79	9	1	79	20739995	20739917	1e-14
ctg1241	CYC008J24	CYC008J24.r	chr1	94.34	53	3	471	523	20566347	20566399	2e-13
ctg1241	CYC016C04	CYC016C04.f	chr2	90.62	64	6	387	450	25969455	25969518	1e-12
ctg1241	CYC016C04	CYC016C04.r	chr25	92.68	41	3	264	304	7649883	7649843	3e-06
ctg1241	CYC023B05	CYC023B05.r	chr1	88.52	122	8	668	788	22168184	22168068	7e-20
ctg1241	CYC026H10	CYC026H10.f	chr22	90.57	53	5	654	706	18006933	18006985	2e-08
ctg1241	CYC026H10	CYC026H10.r	chr19	94.59	37	2	187	223	23544189	23544225	4e-06
ctg1241	CYC029K13	CYC029K13.f	chr1	84.34	166	20	303	468	21625573	21625414	2e-26
ctg1241	CYC029K13	CYC029K13.r	chr5	88.24	85	9	515	599	32745230	32745147	2e-13
ctg1241	CYC035G07	CYC035G07.f	chr1	96.94	98	3	25	122	20642201	20642104	4e-40
ctg1241	CYC035G07	CYC035G07.r	chr1	86.32	95	13	386	480	20327574	20327668	1e-14
ctg1241	CYC038K02	CYC038K02.f	chr1	91.89	222	18	207	428	20960872	20961093	2e-78
ctg1241	CYC038K02	CYC038K02.r	chr22	97.37	38	1	648	685	39652392	39652429	3e-09
ctg1241	CYC044D03	CYC044D03.f	chr6	94	50	3	568	617	38131957	38131908	1e-11
ctg1241	CYC044D03	CYC044D03.r	chr1	89.77	176	18	1	176	22172663	22172488	6e-51
ctg1241	CYC047D15	CYC047D15.f	chr1	96.67	150	5	408	557	20601606	20601755	2e-66
ctg1241	CYC047D15	CYC047D15.r	chr1	88.12	160	19	273	432	20939443	20939284	4e-39
ctg1241	CYC049O19	CYC049O19.f	chr1	92.86	112	8	482	593	22053981	22053870	1e-36
ctg1241	CYC049O19	CYC049O19.r	chr21	94.74	38	2	61	98	28427354	28427391	8e-07
ctg1241	CYC051M18	CYC051M18.f	chr1	80.07	276	44	5	277	20466119	20465852	6e-14
ctg1241	CYC051M18	CYC051M18.r	chr1	93.44	61	3	652	711	20266099	20266159	2e-13
ctg1241	CYC056L02	CYC056L02.f	chr1	84.34	166	20	227	392	21625573	21625414	1e-26
ctg1241	CYC056L02	CYC056L02.r	chr1	93.33	90	6	148	237	21422636	21422725	3e-28
ctg1241	CYC059L01	CYC059L01.f	chr1	84.52	575	71	238	797	21868707	21869278	3e-99
ctg1241	CYC059L01	CYC059L01.r	chr1	89.8	49	5	316	364	22167659	22167611	3e-06
ctg1241	CYC061F04	CYC061F04.f	chr1	85.03	394	30	120	485	20651834	20652226	1e-88
ctg1241	CYC061F04	CYC061F04.r	chr1	89.51	143	15	40	182	20845887	20845745	2e-38
ctg1241	CYC062G11	CYC062G11.f	chr1	91.67	60	5	184	243	21457869	21457810	1e-12
ctg1241	CYC062G11	CYC062G11.r	chr1	84.64	332	41	251	573	21113869	21114199	3e-62
ctg1241	CYC069D11	CYC069D11.r	chr9	97.06	34	1	472	505	54659366	54659399	9e-07
ctg1241	CYC076P06	CYC076P06.f	chr1	94.17	206	12	22	227	21977466	21977261	3e-83
ctg1241	CYC076P06	CYC076P06.r	chr1	85.42	96	13	312	407	21670405	21670499	2e-10
ctg1241	CYC077M10	CYC077M10.f	chr1	87.78	401	29	3	384	20621606	20622005	3e-108
ctg1241	CYC080K03	CYC080K03.f	chr1	89.31	159	17	276	434	20348730	20348888	4e-43
ctg1241	CYC080K03	CYC080K03.r	chr1	89.87	237	16	8	236	20651555	20651319	6e-75
ctg1241	CYC081P17	CYC081P17.r	chr1	85.45	268	39	7	274	21461490	21461757	4e-56
ctg1241	CYC084O13	CYC084O13.f	chr1	93.33	150	10	571	720	22027917	22028066	2e-54
ctg1241	CYC087D13	CYC087D13.f	chr13	93.1	58	4	595	652	18128946	18128889	7e-14
ctg1241	CYC087D13	CYC087D13.r	chr1	90.57	53	5	566	618	21560840	21560788	1e-08
ctg1241	CYC090G09	CYC090G09.f	chr1	86.76	68	9	744	811	20762024	20761957	6e-08
ctg1241	CYC091B17	CYC091B17.f	chr1	88.43	121	10	271	387	21487897	21487777	4e-24
ctg1241	CYC091B17	CYC091B17.r	chr22	89.83	59	6	293	351	18947708	18947650	6e-10
ctg1241	CYC095O23	CYC095O23.f	chr1	84.88	86	13	61	146	20565981	20566066	2e-09
ctg1241	CYC100O13	CYC100O13.f	chr1	90.4	177	17	561	737	21154468	21154644	6e-54
ctg1241	CYC100O13	CYC100O13.r	chr9	97.06	34	1	463	496	54659366	54659399	8e-07
ctg1242	CYC004E02	CYC004E02.f	chr22	90.79	239	22	520	758	25501096	25501334	6e-79
ctg1242	CYC030C11	CYC030C11.r	chr2	86.96	69	9	260	328	25127475	25127543	1e-08
ctg1242	CYC036A06	CYC036A06.f	chr22	91.83	563	43	81	640	27410082	27409520	0
ctg1242	CYC036A06	CYC036A06.r	chr17	84.15	82	13	200	281	32032575	32032494	8e-07
ctg1242	CYC037N15	CYC037N15.r	chr22	90.51	137	13	100	236	25207521	25207385	1e-39
ctg1242	CYC040F03	CYC040F03.f	chr22	81.97	294	43	458	750	26852381	26852097	7e-26
ctg1242	CYC040F03	CYC040F03.r	chr22	82.69	104	18	24	127	26641825	26641928	5e-08
ctg1242	CYC054A10	CYC054A10.f	chr22	97.73	44	1	447	490	27335760	27335717	1e-12
ctg1242	CYC054A10	CYC054A10.r	chr9	89.47	57	6	267	323	14230304	14230360	1e-08
ctg1242	CYC054G17	CYC054G17.f	chr22	92.23	103	8	478	580	25169645	25169747	3e-31
ctg1242	CYC054G17	CYC054G17.r	chr22	91.37	139	12	511	649	25535848	25535710	4e-43
ctg1242	CYC054H18	CYC054H18.f	chr22	86.51	126	17	36	161	27392519	27392394	7e-24
ctg1242	CYC054H18	CYC054H18.r	chr19	92.5	40	3	29	68	8114669	8114708	9e-07
ctg1242	CYC055J03	CYC055J03.r	chr5	93.04	273	18	365	637	61986900	61987171	1e-94
ctg1242	CYC057C02	CYC057C02.f	chr22	86.55	275	34	215	487	26408761	26408488	2e-57
ctg1242	CYC057C02	CYC057C02.r	chr22	88.77	187	21	535	721	25539406	25539592	3e-50
ctg1242	CYC058G18	CYC058G18.f	chr8	85.16	128	19	89	216	39078349	39078222	6e-20
ctg1242	CYC061B21	CYC061B21.r	chr22	90.57	159	13	138	295	26395233	26395076	4e-33
ctg1242	CYC065G03	CYC065G03.r	chr9	89.58	48	5	226	273	10822244	10822291	6e-06
ctg1242	CYC065O14	CYC065O14.f	chr3	88.14	59	7	182	240	58910112	58910170	2e-07
ctg1242	CYC065O14	CYC065O14.r	chr11	86.65	442	51	6	444	26729450	26729014	1e-107
ctg1242	CYC084O05	CYC084O05.r	chr8	97.06	34	1	78	111	43472232	43472199	5e-07
ctg1242	CYC085J18	CYC085J18.r	chr3	89.25	93	10	227	319	59255843	59255935	1e-20
ctg1242	CYC093P11	CYC093P11.f	chr15	93.62	47	3	185	231	12302434	12302388	9e-10
ctg1242	CYC137K01	CYC137K01.f	chr22	90.43	115	11	183	297	25284297	25284183	2e-31
ctg125	CYC004E08	CYC004E08.f	chr9	84.77	151	23	14	164	29007898	29008048	4e-24
ctg125	CYC004E08	CYC004E08.r	chr3	95.56	45	2	570	614	43539781	43539825	5e-11
ctg125	CYC018D07	CYC018D07.f	chr21	89.04	73	8	259	331	37118675	37118747	2e-13
ctg125	CYC019J10	CYC019J10.f	chr9	87.16	514	65	1	514	29214491	29213979	1e-135
ctg125	CYC019J10	CYC019J10.r	chr9	84.77	151	23	41	191	29007898	29008048	3e-24
ctg125	CYC019O12	CYC019O12.f	chr9	92.45	53	4	1	53	29214417	29214365	3e-12
ctg125	CYC025B11	CYC025B11.f	chr9	87.88	165	15	504	666	29425865	29426026	1e-36
ctg125	CYC025B11	CYC025B11.r	chr9	85.37	205	30	88	292	29723969	29723765	1e-39
ctg125	CYC027C04	CYC027C04.f	chr9	96.91	259	7	488	746	28163883	28164140	6e-122
ctg125	CYC027C04	CYC027C04.r	chr9	88.26	247	26	462	708	28473941	28473698	7e-60
ctg125	CYC028H08	CYC028H08.f	chr9	92.84	377	24	1	377	29352029	29351656	3e-148
ctg125	CYC028K02	CYC028K02.f	chr18	94.23	52	3	362	413	11909958	11910009	9e-13
ctg125	CYC028K02	CYC028K02.r	chr9	87.32	284	36	342	625	29218389	29218672	2e-72
ctg125	CYC030H02	CYC030H02.f	chr9	90.67	75	7	261	335	28517206	28517280	6e-17
ctg125	CYC030H02	CYC030H02.r	chr9	88.31	231	26	421	650	28772077	28771847	6e-60
ctg125	CYC030N11	CYC030N11.f	chr9	96.3	189	7	130	318	29678172	29677984	3e-85
ctg125	CYC030N11	CYC030N11.r	chr9	92.42	264	16	123	385	29321911	29322171	4e-92
ctg125	CYC031J06	CYC031J06.f	chr9	87.88	165	15	504	666	29425865	29426026	1e-36
ctg125	CYC031J06	CYC031J06.r	chr9	87.96	108	13	5	112	29666564	29666457	3e-22
ctg125	CYC034J04	CYC034J04.f	chr9	88.65	423	34	220	628	29409001	29408579	4e-126
ctg125	CYC035C03	CYC035C03.f	chr9	87.04	594	58	188	765	29417973	29418563	6e-162
ctg125	CYC040A05	CYC040A05.f	chr9	83.98	206	32	91	296	29723969	29723765	1e-30
ctg125	CYC040A05	CYC040A05.r	chr9	90.37	405	31	163	560	29428725	29429128	3e-136
ctg125	CYC044C02	CYC044C02.f	chr9	87.98	516	56	7	519	29470544	29470032	3e-139
ctg125	CYC044C02	CYC044C02.r	chr9	92.51	187	14	483	669	29307245	29307431	4e-67
ctg125	CYC044J24	CYC044J24.f	chr9	91.14	79	7	132	210	28944982	28944904	2e-19
ctg125	CYC045D19	CYC045D19.f	chr9	90.2	102	9	4	105	29321753	29321653	2e-23
ctg125	CYC045D19	CYC045D19.r	chr9	93.55	155	10	639	793	29070804	29070958	2e-57
ctg125	CYC049F17	CYC049F17.r	chr9	87.98	516	56	8	520	29470544	29470032	3e-139
ctg125	CYC049K23	CYC049K23.f	chr9	88.07	587	57	1	577	28237565	28238148	6e-159
ctg125	CYC050J14	CYC050J14.f	chr9	87.38	214	27	405	618	28922107	28922320	4e-52
ctg125	CYC050J14	CYC050J14.r	chr9	90.99	555	44	167	718	29167791	29167240	0
ctg125	CYC054P14	CYC054P14.f	chr8	91.3	46	4	468	513	45735292	45735247	6e-07
ctg125	CYC056G14	CYC056G14.f	chr9	88.21	280	29	328	606	28289775	28290051	1e-70
ctg125	CYC056G14	CYC056G14.r	chr9	85.75	456	50	3	456	28544313	28543871	6e-103
ctg125	CYC058K08	CYC058K08.f	chr12	91.94	62	5	533	594	30910435	30910496	6e-14
ctg125	CYC058K08	CYC058K08.r	chr9	89.07	247	24	461	707	28473941	28473698	1e-64
ctg125	CYC059D01	CYC059D01.f	chr13	91.38	406	35	79	484	49868148	49868553	1e-147
ctg125	CYC062C08	CYC062C08.f	chr9	82.52	326	56	1	326	29214303	29213979	6e-45
ctg125	CYC062C08	CYC062C08.r	chr9	91.03	234	21	207	440	28999803	29000036	2e-78
ctg125	CYC072P06	CYC072P06.f	chr9	87.38	214	27	405	618	28922107	28922320	4e-52
ctg125	CYC073N14	CYC073N14.f	chr21	93.63	157	10	183	339	17520752	17520596	5e-59
ctg125	CYC073N14	CYC073N14.r	chr15	97.3	37	1	337	373	10127557	10127521	1e-08
ctg125	CYC079O10	CYC079O10.r	chr14	93.55	62	4	127	188	32078048	32078109	2e-16
ctg125	CYC080M01	CYC080M01.f	chr2	96.43	56	2	273	328	56178022	56177967	2e-17
ctg125	CYC090O01	CYC090O01.f	chr9	93.37	196	12	164	359	28130862	28130668	2e-72
ctg125	CYC090O01	CYC090O01.r	chr9	94.78	134	7	1	134	27932133	27932266	4e-52
ctg125	CYC091E24	CYC091E24.f	chr9	88.09	319	26	316	622	28612273	28612591	9e-90
ctg125	CYC091E24	CYC091E24.r	chr9	93.4	197	13	125	321	29056391	29056195	1e-75
ctg125	CYC091O23	CYC091O23.f	chr9	90.91	396	33	132	525	29678172	29677778	3e-132
ctg125	CYC091O23	CYC091O23.r	chr9	88.26	545	49	1	542	29400783	29401315	2e-161
ctg125	CYC095F17	CYC095F17.f	chr9	91.35	474	37	162	633	29678172	29677701	2e-164
ctg125	CYC095F17	CYC095F17.r	chr9	89.67	397	32	14	401	29343272	29343668	1e-121
ctg125	CYC097M09	CYC097M09.f	chr9	84.41	186	17	43	226	28080628	28080803	5e-32
ctg125	CYC097N24	CYC097N24.f	chr22	89.39	66	6	449	514	29918174	29918238	3e-09
ctg125	CYC097N24	CYC097N24.r	chr9	84.56	149	21	6	153	28664274	28664127	8e-19
ctg1253	CYC036P03	CYC036P03.f	chr3	98.39	62	1	64	125	48451330	48451269	2e-23
ctg1253	CYC036P03	CYC036P03.r	chr3	93.42	152	10	356	507	48175060	48175211	1e-55
ctg1253	CYC047H02	CYC047H02.f	chr3	94.04	151	9	226	376	48365023	48365173	2e-57
ctg1253	CYC047H02	CYC047H02.r	chr3	89.5	181	16	266	445	48575521	48575343	2e-44
ctg1253	CYC061D01	CYC061D01.f	chr3	88.5	226	17	483	704	48402791	48402571	4e-49
ctg1253	CYC061D01	CYC061D01.r	chr2	100	37	0	182	218	41842400	41842436	5e-11
ctg1253	CYC067E03	CYC067E03.f	chr3	93.44	122	8	473	594	48140613	48140734	2e-42
ctg1253	CYC068E19	CYC068E19.f	chr3	91.03	78	6	312	389	48168014	48168090	2e-16
ctg1253	CYC080P23	CYC080P23.r	chr12	90.38	52	5	379	430	19900964	19900913	5e-08
ctg1253	CYC087M14	CYC087M14.r	chr2	100	37	0	680	716	41842400	41842436	6e-11
ctg1255	CYC006L11	CYC006L11.f	chr13	87.92	149	14	1	147	32309344	32309198	3e-31
ctg1255	CYC006L11	CYC006L11.r	chr24	94.59	37	2	117	153	42432630	42432666	4e-06
ctg1255	CYC028L20	CYC028L20.f	chr13	91.51	106	9	1	106	32326956	32327061	1e-30
ctg1255	CYC028L20	CYC028L20.r	chr13	87.06	371	39	152	520	32625956	32625593	4e-86
ctg1255	CYC031D15	CYC031D15.f	chr13	91.51	106	9	1	106	32326956	32327061	1e-30
ctg1255	CYC032L14	CYC032L14.f	chr13	86.81	91	12	1	91	32442006	32441916	1e-14
ctg1255	CYC032L14	CYC032L14.r	chr13	90.83	109	9	461	569	32111270	32111377	1e-27
ctg1255	CYC035B05	CYC035B05.f	chr13	84.32	236	33	446	679	32045285	32045518	8e-35
ctg1255	CYC035B05	CYC035B05.r	chr13	90.32	403	38	222	623	32323845	32323443	6e-134
ctg1255	CYC038J21	CYC038J21.r	chr13	82.16	527	67	186	690	32038883	32039404	3e-77
ctg1255	CYC040M01	CYC040M01.f	chr1	87.85	461	52	4	460	59883721	59884181	1e-129
ctg1255	CYC040M01	CYC040M01.r	chr13	87.31	402	44	433	828	32167436	32167836	4e-111
ctg1255	CYC041N19	CYC041N19.r	chr13	92	50	4	510	559	31944182	31944231	3e-09
ctg1255	CYC051K22	CYC051K22.f	chr13	84.64	332	44	426	751	32167436	32167766	2e-69
ctg1255	CYC051K22	CYC051K22.r	chr13	90.48	126	12	1	126	32442041	32441916	2e-35
ctg1255	CYC097L13	CYC097L13.f	chr13	93.42	517	30	1	513	32613146	32612630	0
ctg1255	CYC097L13	CYC097L13.r	chr13	91.88	382	24	1	375	32279675	32280056	3e-132
ctg1255	CYC135A12	CYC135A12.f	chr13	87.72	456	42	2	457	32431914	32431473	1e-129
ctg1261	CYC006J07	CYC006J07.f	chr3	92.62	149	11	571	719	47397145	47396997	2e-51
ctg1261	CYC006J07	CYC006J07.r	chr3	86.84	114	12	171	281	17791910	17791797	7e-20
ctg1261	CYC017L21	CYC017L21.f	chr3	90.57	106	10	255	360	47374296	47374191	2e-28
ctg1261	CYC017L21	CYC017L21.r	chr3	87.08	178	16	428	599	17867779	17867603	2e-35
ctg1261	CYC017M24	CYC017M24.r	chr14	88.41	69	8	328	396	13203646	13203714	5e-11
ctg1261	CYC021E02	CYC021E02.r	chr25	87.05	440	49	255	691	9860194	9859760	3e-108
ctg1261	CYC060B11	CYC060B11.r	chr6	92.41	79	6	559	637	23982141	23982063	1e-21
ctg1261	CYC065A20	CYC065A20.f	chr17	87.18	78	10	71	148	12872476	12872553	1e-11
ctg1261	CYC065A20	CYC065A20.r	chr1	92.45	53	4	519	571	9151858	9151910	5e-11
ctg1261	CYC065I12	CYC065I12.r	chr3	86.84	114	12	163	273	17791910	17791797	6e-20
ctg1261	CYC066P16	CYC066P16.r	chr20	93.02	43	3	131	173	461970	461928	2e-07
ctg1261	CYC066P17	CYC066P17.f	chr3	88.24	136	16	93	228	13008844	13008979	8e-32
ctg1261	CYC073L05	CYC073L05.r	chr5	88	100	12	514	613	5007608	5007707	5e-20
ctg1261	CYC083K07	CYC083K07.f	chr14	96.97	33	1	87	119	25142777	25142809	1e-06
ctg1261	CYC083K07	CYC083K07.r	chr3	95.18	332	5	67	392	17915188	17914862	3e-132
ctg1261	CYC131H01	CYC131H01.f	chr6	85.12	121	17	181	301	50860617	50860736	8e-16
ctg1261	CYC132O24	CYC132O24.r	chr1	92.68	41	3	223	263	10071614	10071654	2e-06
ctg1266	CYC039G08	CYC039G08.f	chr7	84.98	233	28	150	380	57654660	57654433	1e-33
ctg1266	CYC039G08	CYC039G08.r	chr7	90.34	176	17	8	183	57485593	57485768	2e-53
ctg1266	CYC048E16	CYC048E16.f	chr7	84.97	386	45	89	471	57623734	57623359	9e-68
ctg1266	CYC048E16	CYC048E16.r	chr2	88.24	102	12	503	604	26904263	26904364	4e-21
ctg1266	CYC050M21	CYC050M21.r	chr1	91.49	47	4	138	184	10182970	10183016	2e-07
ctg1266	CYC053C05	CYC053C05.r	chr7	86.32	212	29	169	380	57755916	57756127	3e-46
ctg1266	CYC058K03	CYC058K03.f	chr17	100	29	0	274	302	36160486	36160458	3e-06
ctg1266	CYC058K03	CYC058K03.r	chr7	86.72	128	17	508	635	57525106	57524979	1e-24
ctg1266	CYC069E03	CYC069E03.r	chr7	89.6	173	18	151	323	57419941	57420113	3e-49
ctg1266	CYC071A12	CYC071A12.r	chr7	89.64	251	22	396	642	57549297	57549547	5e-76
ctg1266	CYC073M03	CYC073M03.r	chr7	78.9	545	114	40	584	57943675	57943132	3e-37
ctg1266	CYC074K01	CYC074K01.r	chr24	82.26	124	19	398	518	11832076	11832199	3e-09
ctg1266	CYC096L17	CYC096L17.r	chr24	82.26	124	19	201	321	11832076	11832199	3e-09
ctg1266	CYC134E01	CYC134E01.f	chr24	89.66	87	9	1	87	11815008	11815094	2e-19
ctg1269	CYC011P11	CYC011P11.f	chr3	93.63	157	10	105	261	55706043	55706199	1e-58
ctg1269	CYC034I02	CYC034I02.f	chr3	85.43	254	31	266	515	56180195	56179944	8e-47
ctg1269	CYC034I02	CYC034I02.r	chr3	86.75	83	6	552	630	55835960	55836041	3e-09
ctg1269	CYC035E19	CYC035E19.r	chr3	88.82	161	18	230	390	56032944	56032784	5e-42
ctg1274	CYC020C21	CYC020C21.f	chr25	89.86	69	7	441	509	28451070	28451002	3e-13
ctg1274	CYC020C21	CYC020C21.r	chr3	88	75	9	34	108	30536267	30536341	4e-12
ctg1274	CYC021F01	CYC021F01.r	chr11	96.97	33	1	85	117	29041240	29041272	4e-06
ctg1274	CYC024I21	CYC024I21.f	chr10	100	30	0	309	338	21227008	21227037	9e-07
ctg1274	CYC024I21	CYC024I21.r	chr10	94.87	39	2	373	411	24024312	24024274	2e-07
ctg1274	CYC026O21	CYC026O21.r	chr8	91.23	57	5	443	499	19155952	19156008	6e-11
ctg1274	CYC036C14	CYC036C14.f	chr14	95.65	46	2	222	267	14541210	14541165	1e-11
ctg1274	CYC046B05	CYC046B05.f	chr1	94.74	38	2	762	799	31707731	31707694	9e-07
ctg1274	CYC053K14	CYC053K14.f	chr24	92.59	54	4	240	293	26416434	26416487	2e-11
ctg1274	CYC064N14	CYC064N14.f	chr8	84.57	188	28	456	643	47634312	47634498	2e-29
ctg1274	CYC064N14	CYC064N14.r	chr1	100	29	0	214	242	7898809	7898781	3e-06
ctg1274	CYC070M14	CYC070M14.r	chr10	92.31	52	4	68	119	31822290	31822239	1e-10
ctg1274	CYC071P10	CYC071P10.f	chr16	97.87	47	1	722	768	22064834	22064880	2e-14
ctg1274	CYC072N15	CYC072N15.f	chr16	95.83	48	2	433	480	13436674	13436721	9e-13
ctg1274	CYC085E04	CYC085E04.f	chr22	84.85	132	20	444	575	41172640	41172509	7e-20
ctg1274	CYC085E04	CYC085E04.r	chr22	87	100	13	67	166	40959973	40960072	2e-17
ctg1274	CYC090C13	CYC090C13.r	chr13	94.59	37	2	81	117	18267821	18267785	3e-06
ctg1274	CYC097M03	CYC097M03.f	chr22	89.19	185	20	150	334	40884023	40883839	7e-52
ctg1274	CYC097M03	CYC097M03.r	chr3	96.97	33	1	405	437	56768643	56768611	2e-06
ctg1274	CYC099N05	CYC099N05.f	chr20	90	60	6	612	671	12584479	12584420	2e-10
ctg1274	CYC099O24	CYC099O24.r	chr1	94.57	92	4	72	163	51244449	51244359	2e-29
ctg1274	CYC134E23	CYC134E23.f	chr21	84.9	192	29	46	237	38156984	38157175	3e-34
ctg1274	CYC137I18	CYC137I18.r	chr22	87.5	72	9	433	504	41390135	41390064	2e-10
ctg1277	CYC011B05	CYC011B05.f	chr18	89.86	444	34	243	686	34496066	34496498	7e-137
ctg1277	CYC011B05	CYC011B05.r	chr18	87.94	199	21	26	221	34766195	34765997	3e-49
ctg1277	CYC033J23	CYC033J23.f	chr20	89.75	283	24	231	509	11098840	11099121	2e-85
ctg1277	CYC036E13	CYC036E13.f	chr18	88.27	162	19	9	170	34768406	34768567	2e-40
ctg1277	CYC036E13	CYC036E13.r	chr18	92.66	109	8	609	717	34973215	34973107	8e-35
ctg1277	CYC043D09	CYC043D09.f	chr20	87.62	210	26	553	762	11571720	11571511	4e-52
ctg1277	CYC043D09	CYC043D09.r	chr20	86.62	284	34	103	385	11252169	11252449	3e-64
ctg1277	CYC053J24	CYC053J24.f	chr3	84.82	224	33	513	736	42020654	42020432	5e-39
ctg1277	CYC053J24	CYC053J24.r	chr18	93.75	80	5	609	688	34973215	34973136	1e-24
ctg1277	CYC084P17	CYC084P17.r	chr20	86.62	284	34	149	431	11252169	11252449	5e-64
ctg1277	CYC085F07	CYC085F07.f	chr18	92.45	53	3	707	759	34769969	34770020	1e-08
ctg1277	CYC085L18	CYC085L18.f	chr20	83.05	118	20	8	125	11235551	11235668	2e-11
ctg1277	CYC139H23	CYC139H23.f	chr18	87.04	463	57	1	463	34592904	34593363	6e-109
ctg1277	CYC139H23	CYC139H23.r	chr18	86.69	263	31	9	270	34816137	34815878	4e-56
ctg1281	CYC004O10	CYC004O10.f	chr2	86.96	115	13	2	114	34644219	34644105	7e-20
ctg1281	CYC005G02	CYC005G02.r	chr9	88.89	63	7	423	485	3981179	3981241	9e-10
ctg1281	CYC006L05	CYC006L05.r	chr3	84.12	296	47	119	414	24365706	24366001	2e-53
ctg1281	CYC012K05	CYC012K05.f	chr20	95.18	249	12	1	249	10654596	10654844	5e-109
ctg1281	CYC012N10	CYC012N10.f	chr16	87.38	531	44	136	663	7649977	7650487	7e-140
ctg1281	CYC012N10	CYC012N10.r	chr18	92.31	52	4	42	93	39898849	39898900	2e-10
ctg1281	CYC015C11	CYC015C11.r	chr15	95.45	44	2	23	66	2761655	2761612	2e-10
ctg1281	CYC017E17	CYC017E17.r	chr22	89.16	83	8	130	211	21835433	21835515	1e-14
ctg1281	CYC020E24	CYC020E24.r	chr2	91.94	124	8	240	361	35474419	35474296	3e-37
ctg1281	CYC022F05	CYC022F05.f	chr6	88.14	59	7	733	791	9782535	9782593	2e-07
ctg1281	CYC022F05	CYC022F05.r	chr6	91.5	200	17	1	200	7675679	7675878	1e-67
ctg1281	CYC023B12	CYC023B12.f	chr5	94.59	37	2	689	725	46249506	46249470	4e-06
ctg1281	CYC024K05	CYC024K05.f	chr1	91.3	46	4	126	171	16242607	16242652	9e-07
ctg1281	CYC024K05	CYC024K05.r	chr3	85.17	472	57	75	545	53217610	53218069	2e-96
ctg1281	CYC025N05	CYC025N05.f	chr1	94.34	53	2	700	751	53562779	53562831	6e-11
ctg1281	CYC027N13	CYC027N13.f	chr20	96	50	2	524	573	45222532	45222581	7e-14
ctg1281	CYC027N13	CYC027N13.r	chr20	87.25	102	11	584	683	44906395	44906496	6e-14
ctg1281	CYC029N13	CYC029N13.f	chr14	85.51	69	10	35	103	13203714	13203646	4e-06
ctg1281	CYC029N13	CYC029N13.r	chr1	83.69	141	23	221	361	11515460	11515320	4e-18
ctg1281	CYC030A03	CYC030A03.f	chr2	81.68	262	37	355	612	35449146	35448892	3e-28
ctg1281	CYC030A03	CYC030A03.r	chr2	97.22	36	1	503	538	26211765	26211730	6e-08
ctg1281	CYC030I22	CYC030I22.r	chr2	82.06	262	36	355	612	35449146	35448892	1e-30
ctg1281	CYC030L12	CYC030L12.f	chr2	91.45	152	9	201	351	35457671	35457523	6e-45
ctg1281	CYC032B23	CYC032B23.f	chr22	80.95	168	31	548	715	33080202	33080036	2e-10
ctg1281	CYC032B23	CYC032B23.r	chr2	88.89	90	10	66	155	34991871	34991960	2e-19
ctg1281	CYC032C11	CYC032C11.f	chr24	89.29	112	12	101	212	15773157	15773046	5e-27
ctg1281	CYC032G16	CYC032G16.f	chr20	89.47	114	11	293	406	45340395	45340283	6e-26
ctg1281	CYC032I05	CYC032I05.f	chr4	100	30	0	21	50	25794028	25794057	9e-07
ctg1281	CYC033M12	CYC033M12.f	chr23	97.22	36	1	230	265	43323313	43323348	6e-08
ctg1281	CYC035P15	CYC035P15.f	chr18	87.3	63	8	464	526	16477127	16477065	2e-07
ctg1281	CYC035P15	CYC035P15.r	chr6	100	45	0	207	251	54728924	54728880	8e-16
ctg1281	CYC036C19	CYC036C19.f	chr3	94.2	69	4	671	739	24569970	24570038	2e-20
ctg1281	CYC041K19	CYC041K19.r	chr1	82.99	394	43	132	521	5598648	5598275	1e-63
ctg1281	CYC053M21	CYC053M21.f	chr20	87.33	442	46	186	624	44950858	44951292	6e-116
ctg1281	CYC056B17	CYC056B17.f	chr14	91.3	46	4	147	192	34969857	34969902	5e-07
ctg1281	CYC056D17	CYC056D17.f	chr3	90.8	87	7	46	131	24707019	24706933	3e-19
ctg1281	CYC056G13	CYC056G13.r	chr1	83.69	141	23	221	361	11515460	11515320	4e-18
ctg1281	CYC057A22	CYC057A22.f	chr3	96.3	54	2	286	339	34634904	34634957	2e-16
ctg1281	CYC057A22	CYC057A22.r	chr22	97.78	135	3	486	620	34507151	34507285	3e-62
ctg1281	CYC057H12	CYC057H12.f	chr2	89.66	174	18	587	760	34732798	34732971	1e-49
ctg1281	CYC059G05	CYC059G05.r	chr1	88	175	21	87	261	2159684	2159858	3e-43
ctg1281	CYC059K11	CYC059K11.f	chr1	86.56	253	31	25	275	5353533	5353784	2e-54
ctg1281	CYC059K11	CYC059K11.r	chr1	85.6	639	70	81	718	5474366	5473749	2e-158
ctg1281	CYC061C20	CYC061C20.f	chr1	95.35	43	1	9	50	53562789	53562831	2e-07
ctg1281	CYC061C20	CYC061C20.r	chr22	96	50	2	286	335	9417373	9417324	5e-14
ctg1281	CYC066L07	CYC066L07.r	chr2	89.3	215	23	16	230	34691265	34691051	3e-62
ctg1281	CYC071I10	CYC071I10.f	chr23	97.22	36	1	21	56	43323313	43323348	6e-08
ctg1281	CYC071K08	CYC071K08.f	chr2	82.28	237	30	280	504	35251219	35250983	3e-31
ctg1281	CYC075I07	CYC075I07.f	chr2	84.49	374	50	281	653	34973340	34973706	2e-66
ctg1281	CYC076N20	CYC076N20.r	chr20	97.4	77	2	47	123	45042989	45043065	4e-30
ctg1281	CYC080E22	CYC080E22.f	chr2	85.12	121	17	198	317	34669991	34670111	1e-15
ctg1281	CYC080E22	CYC080E22.r	chr24	97.14	35	1	108	142	23424169	23424135	2e-07
ctg1281	CYC082B08	CYC082B08.r	chr15	97.73	44	1	23	66	2761655	2761612	9e-13
ctg1281	CYC083F11	CYC083F11.f	chr16	96.36	55	2	652	706	7886893	7886947	6e-17
ctg1281	CYC083F11	CYC083F11.r	chr5	95.45	44	2	491	534	49770780	49770823	2e-10
ctg1281	CYC085L06	CYC085L06.f	chr6	96.45	197	7	602	798	7760053	7760249	1e-89
ctg1281	CYC085L06	CYC085L06.r	chr6	92	50	4	625	674	9702735	9702784	4e-09
ctg1281	CYC088O21	CYC088O21.f	chr2	80.94	341	61	384	723	35451743	35451406	8e-38
ctg1281	CYC088O21	CYC088O21.r	chr2	89.94	318	31	41	358	35163449	35163765	4e-100
ctg1281	CYC096P15	CYC096P15.r	chr21	97.14	35	1	467	501	27630539	27630573	1e-07
ctg1281	CYC099J16	CYC099J16.r	chr3	90.2	51	5	1	51	24443065	24443115	2e-08
ctg1281	CYC136B14	CYC136B14.f	chr2	88.65	185	20	216	399	34827472	34827656	3e-53
ctg1281	CYC136D24	CYC136D24.f	chr1	88.73	71	8	138	208	59086905	59086975	3e-12
ctg1281	CYC137O12	CYC137O12.f	chr15	93.62	47	2	9	54	6855486	6855440	2e-07
ctg1281	CYC137O12	CYC137O12.r	chr9	82.97	229	38	12	240	41004550	41004323	5e-30
ctg1282	CYC009J01	CYC009J01.r	chr3	83.95	243	34	63	305	32677960	32678197	7e-38
ctg1282	CYC010J13	CYC010J13.r	chr3	92.2	141	8	559	696	32626834	32626694	1e-42
ctg1282	CYC023C16	CYC023C16.f	chr3	84.73	275	36	348	621	32614979	32614710	2e-47
ctg1282	CYC025J11	CYC025J11.f	chr3	83.92	423	56	244	654	32991361	32990939	5e-73
ctg1282	CYC026P07	CYC026P07.f	chr3	87.55	257	32	1	257	32866691	32866947	8e-66
ctg1282	CYC026P07	CYC026P07.r	chr3	91.37	139	12	22	160	33029503	33029365	4e-43
ctg1282	CYC028B04	CYC028B04.f	chr19	94.9	98	5	312	409	30453222	30453319	2e-35
ctg1282	CYC028C05	CYC028C05.f	chr23	85.53	76	11	435	510	14773756	14773831	4e-08
ctg1282	CYC028C05	CYC028C05.r	chr3	93.2	103	3	5	104	33226725	33226624	3e-27
ctg1282	CYC031J02	CYC031J02.r	chr3	94.82	309	16	4	312	32707865	32707557	4e-135
ctg1282	CYC041C09	CYC041C09.r	chr3	87.59	435	53	11	445	33281139	33280706	3e-117
ctg1282	CYC049B18	CYC049B18.r	chr13	90.57	106	8	338	442	10662600	10662496	1e-23
ctg1282	CYC064H07	CYC064H07.f	chr9	87.41	135	17	12	146	31442530	31442396	1e-17
ctg1282	CYC064H07	CYC064H07.r	chr3	84.62	104	11	485	587	32956184	32956085	7e-10
ctg1282	CYC066H13	CYC066H13.f	chr3	96.62	148	4	576	722	32532050	32532197	7e-63
ctg1282	CYC066H13	CYC066H13.r	chr3	79.91	219	32	56	269	32733075	32732864	9e-10
ctg1282	CYC078K09	CYC078K09.f	chr3	84.73	275	36	391	664	32614979	32614710	2e-47
ctg1282	CYC080G18	CYC080G18.f	chr3	84.52	84	13	514	597	32784545	32784462	6e-08
ctg1282	CYC080G18	CYC080G18.r	chr3	90.59	170	6	71	240	32611204	32611363	3e-52
ctg1282	CYC090P03	CYC090P03.f	chr3	84.62	273	36	424	695	32614979	32614712	3e-46
ctg1282	CYC099G19	CYC099G19.r	chr19	95.5	200	9	494	693	30559448	30559647	9e-87
ctg1282	CYC100E03	CYC100E03.r	chr1	85.58	104	13	140	242	9275675	9275777	2e-10
ctg1282	CYC136M03	CYC136M03.f	chr3	89.44	142	15	279	420	32753345	32753204	7e-38
ctg1325	CYC029B23	CYC029B23.f	chr1	90.61	213	20	4	216	30185902	30185690	3e-68
ctg1325	CYC036M06	CYC036M06.f	chr1	90.49	347	30	113	459	30261609	30261266	5e-113
ctg1325	CYC036M06	CYC036M06.r	chr1	83.64	110	18	582	691	29797896	29798005	1e-11
ctg1325	CYC037L12	CYC037L12.f	chr1	96.52	201	7	166	366	29675267	29675467	4e-92
ctg1325	CYC037L12	CYC037L12.r	chr1	92.12	165	13	532	696	30083335	30083171	3e-56
ctg1325	CYC046J22	CYC046J22.r	chr1	93.62	47	3	259	305	30128080	30128034	9e-10
ctg1325	CYC134E17	CYC134E17.f	chr1	89.53	172	18	209	380	29803351	29803522	1e-48
ctg1329	CYC029B21	CYC029B21.f	chr14	92.36	157	12	180	336	38105852	38106008	7e-54
ctg1329	CYC030E08	CYC030E08.f	chr6	86.02	93	12	405	497	21832486	21832577	7e-11
ctg1329	CYC033D23	CYC033D23.f	chr11	95.89	146	6	566	711	44820076	44819931	1e-61
ctg1329	CYC033D23	CYC033D23.r	chr2	91.67	96	7	484	578	5158214	5158119	9e-25
ctg1329	CYC034F06	CYC034F06.f	chr2	87.8	82	10	14	95	12202665	12202746	7e-14
ctg1329	CYC034F06	CYC034F06.r	chr12	95.65	46	2	407	452	33426421	33426466	2e-11
ctg1329	CYC044B11	CYC044B11.f	chr4	94.83	58	3	474	531	29609739	29609682	2e-16
ctg1329	CYC044B11	CYC044B11.r	chr13	95.35	43	2	65	107	46933114	46933072	8e-10
ctg1329	CYC082N07	CYC082N07.f	chr13	88.41	69	7	460	528	22266985	22266918	1e-08
ctg1329	CYC135I12	CYC135I12.r	chr11	83.57	207	23	74	269	44911950	44911744	3e-32
ctg133	CYC009E21	CYC009E21.f	chr1	84.72	144	22	217	360	11515460	11515317	3e-22
ctg133	CYC013G04	CYC013G04.f	chr12	95.12	123	6	504	626	4655163	4655041	7e-48
ctg133	CYC013G04	CYC013G04.r	chr12	93.33	90	6	43	132	4330494	4330583	2e-28
ctg133	CYC015E14	CYC015E14.f	chr15	86.67	360	35	220	578	23367755	23367408	6e-82
ctg133	CYC020A04	CYC020A04.r	chr3	94.44	54	3	453	506	34634957	34634904	6e-14
ctg133	CYC020I18	CYC020I18.f	chr14	84.88	86	11	117	200	7954554	7954469	2e-07
ctg133	CYC022E22	CYC022E22.f	chr9	87.78	90	10	668	756	1060203	1060292	6e-14
ctg133	CYC026P15	CYC026P15.r	chr12	90.54	74	7	696	769	4373818	4373745	3e-16
ctg133	CYC029P09	CYC029P09.r	chr19	90.16	61	6	124	184	31542055	31541995	4e-11
ctg133	CYC029P11	CYC029P11.r	chr8	85	100	15	65	164	37293653	37293554	9e-13
ctg133	CYC032H06	CYC032H06.f	chr17	94.12	51	3	397	447	14634205	14634155	2e-12
ctg133	CYC041N20	CYC041N20.r	chr15	94.24	295	16	1	294	23584911	23584617	4e-122
ctg133	CYC044E06	CYC044E06.f	chr15	93.33	45	3	780	824	23352676	23352720	2e-08
ctg133	CYC044E06	CYC044E06.r	chr15	94.12	170	10	1	170	23673450	23673281	2e-66
ctg133	CYC044F19	CYC044F19.r	chr15	91.57	261	22	235	495	23432700	23432440	4e-92
ctg133	CYC048P18	CYC048P18.f	chr4	87.2	125	16	384	508	46185301	46185177	2e-25
ctg133	CYC048P18	CYC048P18.r	chr10	88.97	136	14	448	583	36257077	36257211	7e-32
ctg133	CYC049F01	CYC049F01.f	chr12	80.27	223	41	115	337	4882341	4882560	9e-16
ctg133	CYC049F01	CYC049F01.r	chr12	87.97	133	16	626	758	4948060	4947928	5e-30
ctg133	CYC052J15	CYC052J15.r	chr15	86.93	283	30	369	651	23057326	23057601	1e-70
ctg133	CYC054O22	CYC054O22.f	chr15	85.71	350	44	1	349	23443242	23443586	4e-73
ctg133	CYC054O22	CYC054O22.r	chr15	93.55	124	8	1	124	23673404	23673281	7e-44
ctg133	CYC069C05	CYC069C05.f	chr22	88.61	79	8	667	744	36225158	36225080	4e-12
ctg133	CYC081N04	CYC081N04.f	chr12	86.36	154	21	171	324	4575918	4576071	1e-30
ctg133	CYC084D14	CYC084D14.f	chr3	87.18	78	10	227	304	38058120	38058043	2e-11
ctg133	CYC087F04	CYC087F04.f	chr12	97.37	76	2	693	768	4741973	4742048	2e-29
ctg133	CYC087F04	CYC087F04.r	chr16	89.29	84	8	635	718	38837800	38837882	4e-15
ctg133	CYC099C07	CYC099C07.r	chr6	96.97	33	1	668	700	34388528	34388496	3e-06
ctg133	CYC137O14	CYC137O14.f	chr16	85.19	135	14	342	473	7957270	7957139	2e-19
ctg1335	CYC005C05	CYC005C05.f	chr12	93.75	48	2	131	177	7800428	7800475	6e-08
ctg1335	CYC005C05	CYC005C05.r	chr7	83.67	147	24	559	705	74796380	74796526	2e-19
ctg1335	CYC012P16	CYC012P16.r	chr7	100	29	0	433	461	75750563	75750535	3e-06
ctg1335	CYC013O19	CYC013O19.f	chr7	86.75	83	11	163	245	74731474	74731556	4e-12
ctg1335	CYC080F08	CYC080F08.f	chr7	95.16	62	3	30	91	75352337	75352276	8e-19
ctg1335	CYC080F08	CYC080F08.r	chr8	93.18	44	3	79	122	26844992	26844949	4e-08
ctg1335	CYC081D19	CYC081D19.f	chr7	85.71	119	17	527	645	74449103	74449221	3e-19
ctg1335	CYC081D19	CYC081D19.r	chr20	86.63	172	23	180	351	34828881	34828710	1e-36
ctg1335	CYC093M17	CYC093M17.f	chr23	89.83	59	6	373	431	43146678	43146736	8e-10
ctg1335	CYC093M17	CYC093M17.r	chr7	91.38	58	5	424	481	75335414	75335357	1e-11
ctg1335	CYC095L23	CYC095L23.r	chr13	95.24	42	2	348	389	28200144	28200103	3e-09
ctg1335	CYC098F01	CYC098F01.f	chr7	90.87	252	23	384	635	75357808	75357557	2e-84
ctg1335	CYC131O12	CYC131O12.f	chr7	86	250	35	10	259	75436508	75436757	1e-54
ctg1335	CYC136P02	CYC136P02.r	chr6	83.21	131	21	87	217	50860607	50860736	3e-12
ctg135	CYC004G12	CYC004G12.f	chr7	89.04	228	22	1	227	51646226	51646001	5e-61
ctg135	CYC004G12	CYC004G12.r	chr7	94.31	123	6	568	689	51364168	51364290	3e-43
ctg135	CYC005E18	CYC005E18.f	chr10	87.96	274	31	29	301	12272332	12272604	7e-69
ctg135	CYC005E18	CYC005E18.r	chr6	88.57	70	8	362	431	2535095	2535164	1e-11
ctg135	CYC006C05	CYC006C05.f	chr7	87.59	137	17	602	738	51144196	51144332	5e-30
ctg135	CYC006C05	CYC006C05.r	chr7	93.28	238	13	162	396	51405099	51404862	1e-94
ctg135	CYC015L11	CYC015L11.f	chr5	90.48	63	6	401	463	14603072	14603134	4e-12
ctg135	CYC016J06	CYC016J06.r	chr7	88.79	107	12	561	667	76416138	76416032	4e-24
ctg135	CYC027L17	CYC027L17.f	chr21	88.46	78	8	655	732	23144299	23144375	2e-11
ctg135	CYC037A18	CYC037A18.f	chr10	82.48	137	21	385	518	12656093	12656229	3e-12
ctg135	CYC040N23	CYC040N23.f	chr10	83.84	99	16	36	134	13869964	13869866	9e-10
ctg135	CYC040N23	CYC040N23.r	chr10	88.46	156	17	250	405	13105826	13105672	1e-36
ctg135	CYC056E20	CYC056E20.f	chr7	96.43	140	4	661	800	51021191	51021329	5e-58
ctg135	CYC056E20	CYC056E20.r	chr7	93.02	358	23	1	356	51336996	51336639	4e-141
ctg135	CYC059M03	CYC059M03.f	chr7	90.8	250	19	474	719	50968598	50968847	2e-63
ctg135	CYC059M03	CYC059M03.r	chr11	94.87	39	2	347	385	38600628	38600590	2e-07
ctg135	CYC061P08	CYC061P08.f	chr13	96.97	33	1	146	178	20177145	20177177	3e-06
ctg135	CYC081E01	CYC081E01.r	chr1	87.96	108	13	149	256	21528439	21528546	3e-22
ctg135	CYC081E02	CYC081E02.r	chr21	87.78	90	11	582	671	19577135	19577046	2e-16
ctg135	CYC081I02	CYC081I02.f	chr15	84.5	129	15	189	316	37776392	37776268	2e-15
ctg135	CYC081K02	CYC081K02.r	chr17	89.04	73	8	11	83	38736846	38736774	2e-13
ctg135	CYC093F04	CYC093F04.f	chr10	96.15	52	2	131	182	31822290	31822239	3e-15
ctg135	CYC100O05	CYC100O05.f	chr7	89.05	484	49	31	511	50801302	50801784	1e-147
ctg136	CYC004D14	CYC004D14.f	chr13	89.09	55	6	333	387	6820785	6820731	2e-07
ctg136	CYC004D14	CYC004D14.r	chr13	88.16	245	21	186	424	42802942	42803184	1e-64
ctg136	CYC007B20	CYC007B20.f	chr18	91.57	83	5	1	81	22594664	22594746	6e-20
ctg136	CYC007B20	CYC007B20.r	chr18	85.25	366	38	119	472	22986144	22985783	5e-79
ctg136	CYC013M06	CYC013M06.f	chr4	92.86	56	4	458	513	35256570	35256625	9e-13
ctg136	CYC013M06	CYC013M06.r	chr4	91.94	62	5	178	239	59185543	59185604	5e-14
ctg136	CYC014N17	CYC014N17.f	chr23	87.01	77	10	2	78	21619550	21619626	1e-11
ctg136	CYC017L07	CYC017L07.r	chr25	83.97	312	48	312	621	37374924	37375235	6e-51
ctg136	CYC019I23	CYC019I23.f	chr5	91.3	138	12	1	138	17459324	17459187	1e-42
ctg136	CYC019I23	CYC019I23.r	chr9	97.83	46	1	283	328	35206074	35206119	6e-14
ctg136	CYC019L09	CYC019L09.f	chr18	91.33	173	15	102	274	22531613	22531441	2e-56
ctg136	CYC019L09	CYC019L09.r	chr18	82.76	203	35	186	388	22114030	22114232	1e-26
ctg136	CYC019O14	CYC019O14.f	chr11	87.69	65	8	376	440	25691577	25691641	2e-08
ctg136	CYC019O14	CYC019O14.r	chr5	85.14	74	11	75	148	60199377	60199304	8e-07
ctg136	CYC020F04	CYC020F04.f	chr13	93.26	178	10	1	178	3451730	3451555	1e-64
ctg136	CYC020F04	CYC020F04.r	chr13	86.91	191	11	304	492	3206378	3206556	1e-45
ctg136	CYC021J21	CYC021J21.f	chr11	91.07	56	5	776	831	43461497	43461442	3e-10
ctg136	CYC026A13	CYC026A13.r	chr13	89.92	119	12	544	662	3031336	3031454	3e-31
ctg136	CYC033G24	CYC033G24.f	chr18	85.05	281	41	71	350	22950186	22950466	7e-54
ctg136	CYC033G24	CYC033G24.r	chr18	94.29	70	4	1	70	23232011	23231942	4e-21
ctg136	CYC039H01	CYC039H01.r	chr3	87.21	297	36	287	581	59729527	59729823	1e-70
ctg136	CYC039I18	CYC039I18.f	chr13	96.52	115	3	165	279	3246291	3246178	3e-35
ctg136	CYC039I24	CYC039I24.f	chr18	90.24	82	8	282	363	23157865	23157784	1e-18
ctg136	CYC039I24	CYC039I24.r	chr18	88.55	227	23	331	557	22798025	22798248	5e-48
ctg136	CYC045L09	CYC045L09.f	chr18	79.83	238	30	35	272	22935790	22935571	4e-24
ctg136	CYC045L09	CYC045L09.r	chr18	88.53	218	19	251	462	22527859	22528076	7e-60
ctg136	CYC047G06	CYC047G06.f	chr3	89.39	66	7	429	494	30651798	30651733	1e-11
ctg136	CYC047G06	CYC047G06.r	chr8	83.47	121	20	484	604	55319355	55319235	2e-13
ctg136	CYC047M04	CYC047M04.f	chr11	87.69	65	8	376	440	25691577	25691641	2e-08
ctg136	CYC050F15	CYC050F15.r	chr12	84.87	152	21	360	510	28943101	28942951	7e-20
ctg136	CYC050L15	CYC050L15.r	chr9	87.96	108	13	538	645	54948863	54948756	3e-22
ctg136	CYC053L21	CYC053L21.r	chr3	91.14	79	6	591	668	34634879	34634957	7e-17
ctg136	CYC055I10	CYC055I10.f	chr13	87.67	73	9	520	592	3189443	3189371	7e-11
ctg136	CYC055I10	CYC055I10.r	chr13	89.92	119	12	470	588	3031336	3031454	3e-31
ctg136	CYC058F01	CYC058F01.f	chr18	80.7	316	61	138	453	23154827	23154512	8e-32
ctg136	CYC058F01	CYC058F01.r	chr18	93.1	58	4	342	399	22937017	22937074	5e-14
ctg136	CYC059M23	CYC059M23.f	chr12	95	40	2	525	564	8082922	8082961	5e-08
ctg136	CYC060D11	CYC060D11.f	chr4	91.74	109	9	1	109	29526784	29526892	2e-32
ctg136	CYC060D11	CYC060D11.r	chr16	93.59	78	4	3	80	27797372	27797296	4e-21
ctg136	CYC062H22	CYC062H22.r	chr18	84.75	282	29	304	575	22587429	22587706	5e-45
ctg136	CYC079J20	CYC079J20.f	chr4	89.57	163	14	34	196	29526730	29526889	2e-44
ctg136	CYC079J20	CYC079J20.r	chr12	93.22	59	3	600	658	10481144	10481201	3e-12
ctg136	CYC081M17	CYC081M17.f	chr12	93.1	58	4	604	661	10481144	10481201	5e-14
ctg136	CYC083P20	CYC083P20.f	chr18	90.73	313	18	424	732	23266604	23266299	2e-106
ctg136	CYC083P20	CYC083P20.r	chr18	88.18	423	28	1	421	22897683	22898085	1e-110
ctg136	CYC091M13	CYC091M13.f	chr18	89.33	150	13	489	638	22187197	22187343	6e-33
ctg136	CYC091M13	CYC091M13.r	chr18	88.59	149	15	570	717	22477103	22476956	2e-32
ctg136	CYC098E09	CYC098E09.f	chr4	91.3	46	4	254	299	13777866	13777911	9e-07
ctg136	CYC098E09	CYC098E09.r	chr18	87.23	282	36	43	324	22919656	22919375	3e-71
ctg136	CYC098P11	CYC098P11.f	chr13	90.82	98	8	329	425	3492366	3492269	2e-23
ctg136	CYC099J15	CYC099J15.f	chr14	92.98	57	3	637	692	48527173	48527117	6e-11
ctg136	CYC131A22	CYC131A22.f	chr13	92.86	84	6	81	164	3295718	3295635	8e-25
ctg136	CYC131A22	CYC131A22.r	chr14	93.02	43	3	161	203	25142779	25142821	2e-07
ctg136	CYC132C20	CYC132C20.f	chr25	87.38	103	8	147	244	18716881	18716983	3e-16
ctg136	CYC132H18	CYC132H18.r	chr3	87.36	87	11	72	158	1849412	1849326	6e-15
ctg136	CYC133F18	CYC133F18.f	chr18	96.69	242	6	531	770	23119398	23119157	2e-112
ctg136	CYC133F18	CYC133F18.r	chr18	95.99	274	11	8	281	22919895	22920168	3e-126
ctg136	CYC136M01	CYC136M01.r	chr18	90.38	52	5	380	431	19070669	19070720	6e-08
ctg1369	CYC004E16	CYC004E16.r	chr4	87.86	140	15	21	158	15895733	15895594	4e-27
ctg1369	CYC034B02	CYC034B02.f	chr4	93.94	66	4	372	437	15005013	15004948	8e-19
ctg1369	CYC034B02	CYC034B02.r	chr4	83.33	372	53	287	658	14800638	14801000	2e-59
ctg1369	CYC034K22	CYC034K22.f	chr4	86.42	545	58	307	845	14441574	14442108	4e-126
ctg1369	CYC034K22	CYC034K22.r	chr4	93.88	196	12	52	247	14675048	14674853	3e-77
ctg1369	CYC037C17	CYC037C17.f	chr4	87.64	89	11	1	89	14928635	14928723	8e-16
ctg1369	CYC045K10	CYC045K10.r	chr4	87.82	501	47	2	490	15189412	15189910	1e-135
ctg1369	CYC047B20	CYC047B20.f	chr4	90.62	64	5	339	401	15111014	15111077	3e-10
ctg1369	CYC047B20	CYC047B20.r	chr9	95.12	41	2	529	569	14452196	14452236	1e-08
ctg1369	CYC047H19	CYC047H19.f	chr4	93.35	361	23	16	376	14486102	14486461	1e-144
ctg1369	CYC047H19	CYC047H19.r	chr4	87.29	118	15	185	302	14713701	14713584	1e-23
ctg1369	CYC047P08	CYC047P08.f	chr4	90.79	76	7	436	511	15505015	15504940	2e-17
ctg1369	CYC050B13	CYC050B13.r	chr4	87.25	400	48	361	760	15944614	15944218	1e-104
ctg1369	CYC051I01	CYC051I01.f	chr1	89.8	98	10	404	501	7247255	7247158	2e-23
ctg1369	CYC051I01	CYC051I01.r	chr1	96.79	156	5	207	362	7600456	7600301	4e-70
ctg1369	CYC053C15	CYC053C15.f	chr1	85.54	166	14	382	547	46330048	46330203	1e-33
ctg1369	CYC053C15	CYC053C15.r	chr1	87.19	531	50	198	717	46566569	46566046	3e-130
ctg1369	CYC053F01	CYC053F01.f	chr4	92.29	571	31	1	569	14576772	14577331	0
ctg1369	CYC053F01	CYC053F01.r	chr4	89.13	92	10	76	167	14983248	14983157	6e-20
ctg1369	CYC061A23	CYC061A23.r	chr25	97.14	35	1	562	596	27978118	27978084	2e-07
ctg1369	CYC073A14	CYC073A14.f	chr4	93.65	252	14	195	444	14776919	14777170	2e-96
ctg1369	CYC077N23	CYC077N23.f	chr14	89.8	461	33	3	455	18881262	18880808	3e-145
ctg1369	CYC077N23	CYC077N23.r	chr15	90.74	54	5	199	252	21120986	21121039	3e-09
ctg1369	CYC078A01	CYC078A01.f	chr4	90.62	96	7	4	99	15327988	15327895	2e-23
ctg1369	CYC078A01	CYC078A01.r	chr4	88.29	111	13	200	310	14896537	14896647	2e-24
ctg1369	CYC079B17	CYC079B17.f	chr1	86.3	73	5	290	357	7700742	7700670	9e-09
ctg1369	CYC079B17	CYC079B17.r	chr1	86.96	207	27	134	340	7426319	7426525	5e-48
ctg1369	CYC082D02	CYC082D02.f	chr19	94.44	54	3	177	230	47894830	47894883	6e-14
ctg1369	CYC082D02	CYC082D02.r	chr24	92.68	41	3	377	417	9621642	9621682	4e-06
ctg1369	CYC082L24	CYC082L24.f	chr4	88.83	179	19	156	334	15662747	15662924	1e-45
ctg1369	CYC082L24	CYC082L24.r	chr4	92.55	161	12	125	285	15960181	15960021	2e-56
ctg1369	CYC083C14	CYC083C14.r	chr4	86.59	82	11	503	584	15228693	15228612	1e-11
ctg1369	CYC085E11	CYC085E11.f	chr1	93.42	152	10	182	333	46283445	46283596	1e-55
ctg1369	CYC085E11	CYC085E11.r	chr1	86.57	201	24	378	576	46566569	46566370	3e-37
ctg1369	CYC092I02	CYC092I02.r	chr4	88.81	143	16	165	307	15162953	15163095	3e-36
ctg1369	CYC093A14	CYC093A14.r	chr22	92.45	53	4	89	141	22959434	22959382	4e-11
ctg1369	CYC099D09	CYC099D09.f	chr16	89.09	55	6	342	396	30199178	30199232	2e-07
ctg1369	CYC100P08	CYC100P08.f	chr14	86.35	769	61	1	739	18822334	18821580	0
ctg1369	CYC134D12	CYC134D12.f	chr1	88.17	169	16	29	194	7168188	7168021	8e-39
ctg1375	CYC006J21	CYC006J21.f	chr23	89.25	93	9	353	444	20676038	20676130	4e-18
ctg1375	CYC006J21	CYC006J21.r	chr21	92.67	191	14	223	413	32403123	32403313	2e-69
ctg1375	CYC009D11	CYC009D11.r	chr21	87.92	265	31	114	377	30723480	30723744	3e-68
ctg1375	CYC010L11	CYC010L11.r	chr21	87.55	273	32	308	578	30914274	30914002	6e-69
ctg1375	CYC016I05	CYC016I05.f	chr10	96.43	56	2	163	218	34525599	34525544	2e-17
ctg1375	CYC016I05	CYC016I05.r	chr21	91.56	225	18	444	667	32162560	32162784	2e-75
ctg1375	CYC024E11	CYC024E11.r	chr21	88.65	467	40	3	456	30733201	30733667	8e-140
ctg1375	CYC027G21	CYC027G21.f	chr12	97.14	35	1	241	275	4179924	4179890	1e-07
ctg1375	CYC029N04	CYC029N04.f	chr11	90	70	6	298	366	43461498	43461429	1e-11
ctg1375	CYC029N04	CYC029N04.r	chr21	94	100	6	234	333	29898165	29898264	1e-34
ctg1375	CYC036C05	CYC036C05.f	chr21	91.33	150	13	277	426	30674797	30674946	2e-47
ctg1375	CYC036C05	CYC036C05.r	chr21	91.28	172	15	326	497	31122360	31122189	8e-56
ctg1375	CYC038E01	CYC038E01.f	chr21	86.11	72	7	1	69	30596238	30596309	9e-07
ctg1375	CYC038E01	CYC038E01.r	chr21	86.42	81	11	438	518	30897646	30897726	6e-11
ctg1375	CYC051B06	CYC051B06.f	chr21	86.78	121	16	163	283	30571589	30571469	6e-23
ctg1375	CYC051B06	CYC051B06.r	chr21	80.36	275	50	469	743	30307104	30307374	2e-20
ctg1375	CYC051F03	CYC051F03.f	chr21	84.5	129	20	366	494	31981408	31981536	4e-18
ctg1375	CYC051F03	CYC051F03.r	chr16	93.15	584	34	20	602	12047612	12047034	0
ctg1375	CYC056B12	CYC056B12.r	chr21	88.68	53	6	5	57	30574652	30574704	3e-06
ctg1375	CYC057P24	CYC057P24.r	chr19	88	100	11	290	389	10985974	10986072	2e-17
ctg1375	CYC060B02	CYC060B02.f	chr21	88.64	88	10	337	424	30593524	30593437	1e-17
ctg1375	CYC068I22	CYC068I22.r	chr21	84.99	353	49	18	369	31119684	31120033	2e-69
ctg1375	CYC069A05	CYC069A05.r	chr7	87.34	79	9	316	394	41421439	41421516	8e-10
ctg1375	CYC081D20	CYC081D20.f	chr21	89.09	165	18	15	179	31795007	31794843	2e-44
ctg1375	CYC081D20	CYC081D20.r	chr21	83.23	781	88	2	766	31381591	31382344	5e-113
ctg1375	CYC086D21	CYC086D21.f	chr21	95.6	159	6	1	159	30238955	30239112	1e-64
ctg1375	CYC089O12	CYC089O12.r	chr21	90.62	64	6	16	79	31448012	31448075	5e-13
ctg1377	CYC021E19	CYC021E19.f	chr12	90.02	441	43	392	831	26836381	26836821	1e-144
ctg1377	CYC021E19	CYC021E19.r	chr12	88.4	388	32	235	610	27143228	27142842	8e-112
ctg1377	CYC044M11	CYC044M11.f	chr15	95.24	42	2	364	405	18808596	18808637	4e-09
ctg1377	CYC044M11	CYC044M11.r	chr7	94	150	9	3	152	60871690	60871541	6e-57
ctg1377	CYC052O19	CYC052O19.f	chr8	91.67	48	4	604	651	6590294	6590247	5e-08
ctg1377	CYC052O19	CYC052O19.r	chr7	85.57	97	14	201	297	65729781	65729685	2e-13
ctg1377	CYC072J18	CYC072J18.f	chr12	87.88	99	8	39	133	27217251	27217153	1e-18
ctg1377	CYC072J18	CYC072J18.r	chr12	83.24	513	61	1	498	26989387	26989889	8e-90
ctg1377	CYC073J07	CYC073J07.r	chr18	89.23	65	6	383	446	25812061	25811997	1e-08
ctg1377	CYC093C02	CYC093C02.f	chr7	91.49	94	8	273	366	65754563	65754470	7e-26
ctg1377	CYC137G05	CYC137G05.f	chr7	87.67	592	68	25	615	60951492	60950905	5e-159
ctg1377	CYC137G05	CYC137G05.r	chr7	86.06	373	47	77	444	60696274	60696646	2e-81
ctg1380	CYC018F02	CYC018F02.f	chr23	90.16	61	6	151	211	38923370	38923430	5e-11
ctg1380	CYC042N02	CYC042N02.f	chr19	94.26	122	7	282	403	6980431	6980552	4e-45
ctg1380	CYC042N02	CYC042N02.r	chr19	87.22	133	17	202	334	7310848	7310716	5e-28
ctg1380	CYC053B05	CYC053B05.f	chr19	93.75	48	3	244	291	6998076	6998123	2e-10
ctg1380	CYC053B05	CYC053B05.r	chr2	93.18	44	3	27	70	16273133	16273090	4e-08
ctg1380	CYC063G23	CYC063G23.f	chr9	89.39	66	7	14	79	18635779	18635844	1e-11
ctg1380	CYC063G23	CYC063G23.r	chr13	90.48	84	8	1	84	6264868	6264951	5e-20
ctg1380	CYC070M02	CYC070M02.f	chr19	86.03	229	26	186	412	7478167	7477943	9e-44
ctg1380	CYC070M02	CYC070M02.r	chr13	88	75	9	189	263	26899861	26899935	4e-12
ctg140	CYC009K07	CYC009K07.f	chr2	91.55	142	11	614	755	25420239	25420379	1e-42
ctg140	CYC009K07	CYC009K07.r	chr2	86.96	92	12	8	99	25618650	25618559	4e-15
ctg140	CYC011P23	CYC011P23.f	chr17	88.6	228	26	517	744	38759545	38759318	7e-63
ctg140	CYC011P23	CYC011P23.r	chr3	86.11	72	10	263	334	20706023	20706094	6e-08
ctg140	CYC018G05	CYC018G05.f	chr8	85.99	571	76	1	571	41086897	41086331	3e-135
ctg140	CYC019E01	CYC019E01.f	chr2	95.1	143	7	302	444	25754941	25754799	2e-57
ctg140	CYC021C01	CYC021C01.r	chr10	91.02	167	7	271	434	37563571	37563410	1e-51
ctg140	CYC021P15	CYC021P15.f	chr2	90.24	246	20	479	721	25845218	25844974	8e-75
ctg140	CYC021P15	CYC021P15.r	chr2	85.19	297	30	210	492	25595742	25596038	2e-63
ctg140	CYC024J24	CYC024J24.f	chr17	87.63	186	23	370	555	38374678	38374493	6e-45
ctg140	CYC028H16	CYC028H16.f	chr2	93.51	77	5	694	770	24843296	24843220	8e-23
ctg140	CYC028H16	CYC028H16.r	chr2	83.88	335	25	43	376	24617226	24617532	3e-65
ctg140	CYC030H15	CYC030H15.f	chr2	91.09	258	22	436	692	25585455	25585198	2e-85
ctg140	CYC030H15	CYC030H15.r	chr2	87.83	337	17	166	488	24918128	24918454	2e-91
ctg140	CYC033D08	CYC033D08.f	chr2	90.23	174	17	270	443	25758567	25758740	4e-52
ctg140	CYC035L20	CYC035L20.r	chr2	92.82	195	14	92	286	24630989	24631183	4e-72
ctg140	CYC037A06	CYC037A06.f	chr20	82.31	294	38	257	544	49089474	49089189	1e-36
ctg140	CYC037A06	CYC037A06.r	chr20	92.62	122	6	1	119	49410822	49410701	6e-39
ctg140	CYC038J09	CYC038J09.f	chr2	89.06	393	43	6	398	26666802	26666410	8e-121
ctg140	CYC038J09	CYC038J09.r	chr2	93.98	166	10	514	679	26286400	26286565	4e-64
ctg140	CYC044D07	CYC044D07.f	chr2	86.72	256	23	218	463	25933943	25934197	5e-61
ctg140	CYC044D07	CYC044D07.r	chr2	85.86	297	42	369	665	26146332	26146036	8e-66
ctg140	CYC045A12	CYC045A12.f	chr17	89.83	59	5	279	336	38095558	38095616	2e-07
ctg140	CYC045A12	CYC045A12.r	chr17	92.73	385	25	360	741	38319723	38319339	1e-150
ctg140	CYC046P19	CYC046P19.r	chr17	88.04	92	10	101	192	38402683	38402773	4e-15
ctg140	CYC055M20	CYC055M20.r	chr23	94.83	58	3	457	514	45581121	45581064	2e-16
ctg140	CYC057I12	CYC057I12.f	chr2	88.26	247	27	171	415	25562944	25562698	3e-65
ctg140	CYC057I12	CYC057I12.r	chr21	95.45	44	2	495	538	20997740	20997697	2e-10
ctg140	CYC057K02	CYC057K02.f	chr17	90.51	137	11	137	273	38340539	38340673	9e-38
ctg140	CYC057K02	CYC057K02.r	chr17	92.46	783	49	1	775	38486882	38486102	0
ctg140	CYC057M10	CYC057M10.f	chr2	87.1	124	13	528	648	25848363	25848486	2e-20
ctg140	CYC060L10	CYC060L10.f	chr2	93.88	49	3	193	241	42771816	42771768	7e-11
ctg140	CYC060L10	CYC060L10.r	chr2	91.22	148	13	464	611	25771121	25770974	3e-46
ctg140	CYC060N18	CYC060N18.f	chr18	90.24	164	16	567	730	39005494	39005657	2e-48
ctg140	CYC060N18	CYC060N18.r	chr5	88	75	9	471	545	41652909	41652983	4e-12
ctg140	CYC063H15	CYC063H15.f	chr2	84	375	44	61	428	26451890	26452255	4e-64
ctg140	CYC063H15	CYC063H15.r	chr2	92.93	99	7	428	526	26751506	26751408	3e-31
ctg140	CYC063N16	CYC063N16.f	chr23	96.08	51	2	468	518	45581114	45581064	1e-14
ctg140	CYC063N16	CYC063N16.r	chr2	91.94	62	4	110	171	40916595	40916655	1e-11
ctg140	CYC070A04	CYC070A04.f	chr17	91.85	233	18	81	312	38288406	38288638	4e-80
ctg140	CYC070A04	CYC070A04.r	chr16	92.16	51	4	229	279	39347117	39347067	8e-10
ctg140	CYC072H03	CYC072H03.f	chr2	85.5	200	25	499	698	26526211	26526016	2e-35
ctg140	CYC072H03	CYC072H03.r	chr2	89.86	552	55	27	577	26234370	26234921	0
ctg140	CYC072K04	CYC072K04.r	chr17	90.28	144	14	72	215	38378463	38378606	2e-41
ctg140	CYC076D17	CYC076D17.f	chr18	92.31	52	4	4	55	47175031	47174980	8e-11
ctg140	CYC077K18	CYC077K18.f	chr18	84.7	183	28	393	575	25447513	25447695	2e-31
ctg140	CYC077K18	CYC077K18.r	chr2	88.93	307	34	148	454	25595084	25594778	5e-91
ctg140	CYC077M08	CYC077M08.f	chr6	91.38	58	5	583	640	2941779	2941836	1e-11
ctg140	CYC080G10	CYC080G10.f	chr17	90.23	133	13	1	133	38378474	38378606	3e-37
ctg140	CYC080G10	CYC080G10.r	chr13	89.49	314	32	10	323	49868148	49868460	2e-95
ctg140	CYC083H17	CYC083H17.f	chr2	79.79	282	32	10	285	26187004	26187266	2e-24
ctg140	CYC083H17	CYC083H17.r	chr14	95.12	41	2	275	315	42255760	42255720	1e-08
ctg140	CYC083L08	CYC083L08.f	chr1	95	40	2	46	85	43945950	43945911	6e-08
ctg140	CYC083L08	CYC083L08.r	chr2	90.36	166	16	3	168	26146909	26147074	7e-50
ctg140	CYC083N12	CYC083N12.f	chr23	89.47	95	10	314	408	20676033	20676127	1e-21
ctg140	CYC083N12	CYC083N12.r	chr2	88.66	97	11	156	252	25554197	25554101	1e-20
ctg140	CYC085I03	CYC085I03.f	chr2	84.51	510	57	292	784	25994675	25995179	7e-94
ctg140	CYC085I03	CYC085I03.r	chr2	91.07	56	5	546	601	26271441	26271386	2e-10
ctg140	CYC085P12	CYC085P12.f	chr17	89.47	95	10	460	554	38863923	38863829	1e-21
ctg140	CYC085P12	CYC085P12.r	chr15	93.48	46	3	557	602	11772502	11772457	3e-09
ctg140	CYC087G17	CYC087G17.f	chr9	100	30	0	389	418	14822889	14822918	8e-07
ctg140	CYC090C08	CYC090C08.r	chr2	93.15	73	5	659	731	25829903	25829831	2e-20
ctg140	CYC097G19	CYC097G19.f	chr20	92.5	40	3	364	403	44121143	44121104	7e-06
ctg140	CYC097G19	CYC097G19.r	chr2	85.96	349	36	182	528	25393299	25393636	4e-76
ctg140	CYC099G13	CYC099G13.f	chr20	82.89	532	70	96	621	49099630	49099114	1e-89
ctg140	CYC099H13	CYC099H13.f	chr20	82.86	531	70	1	525	49099629	49099114	3e-89
ctg140	CYC137E10	CYC137E10.f	chr7	86.49	74	9	252	324	59092631	59092704	8e-07
ctg140	CYC137E10	CYC137E10.r	chr10	86.36	154	19	248	401	37594985	37594834	5e-29
ctg140	CYC137E11	CYC137E11.f	chr7	86.49	74	9	295	367	59092631	59092704	8e-07
ctg140	CYC137E11	CYC137E11.r	chr10	86.36	154	19	450	603	37594985	37594834	7e-29
ctg140	CYC137F10	CYC137F10.f	chr17	87.74	106	13	271	376	38701443	38701338	4e-21
ctg140	CYC137F10	CYC137F10.r	chr17	89.55	220	23	1	220	38507499	38507718	8e-66
ctg1443	CYC008J14	CYC008J14.f	chr8	85.98	107	15	380	486	46781210	46781316	6e-17
ctg1443	CYC008J14	CYC008J14.r	chr11	97.44	39	1	432	470	27885339	27885377	7e-10
ctg1443	CYC035L04	CYC035L04.f	chr18	89.8	49	5	213	261	40539261	40539309	4e-06
ctg1443	CYC040H09	CYC040H09.f	chr9	88.48	243	28	228	470	16675391	16675149	5e-67
ctg1443	CYC045C07	CYC045C07.r	chr19	86.9	84	11	34	117	41309067	41309150	1e-13
ctg1443	CYC057L18	CYC057L18.r	chr18	86.08	158	22	4	161	40684078	40684235	1e-30
ctg1443	CYC087J13	CYC087J13.f	chr19	90.91	77	7	342	418	16339711	16339787	4e-18
ctg1443	CYC087J13	CYC087J13.r	chr13	96.97	33	1	217	249	20177145	20177177	4e-06
ctg146	CYC020E04	CYC020E04.f	chr5	83.89	149	24	588	736	33107527	33107379	2e-20
ctg146	CYC020E04	CYC020E04.r	chr5	90.36	83	8	71	153	32874310	32874392	2e-19
ctg146	CYC021I11	CYC021I11.r	chr19	96.57	175	4	1	174	42388500	42388673	3e-74
ctg146	CYC022J21	CYC022J21.r	chr5	90.38	156	15	227	382	32717167	32717012	4e-46
ctg146	CYC028H24	CYC028H24.r	chr19	97.14	175	4	1	175	42388500	42388673	5e-79
ctg146	CYC034G12	CYC034G12.f	chr5	86.65	367	41	389	751	32974586	32974224	1e-83
ctg146	CYC035G22	CYC035G22.f	chr12	92.98	57	4	576	632	17386263	17386319	3e-13
ctg146	CYC035G22	CYC035G22.r	chr19	87.5	408	38	1	400	42282551	42282953	2e-100
ctg146	CYC040K19	CYC040K19.f	chr19	91.01	89	8	37	125	12455081	12455169	7e-23
ctg146	CYC040K19	CYC040K19.r	chr5	88.62	290	24	411	691	32546776	32547065	1e-79
ctg146	CYC044B19	CYC044B19.f	chr19	88.89	54	6	471	524	42198361	42198414	1e-06
ctg146	CYC044B19	CYC044B19.r	chr19	85.71	266	22	509	771	42388088	42387836	2e-57
ctg146	CYC044D04	CYC044D04.f	chr5	82.71	399	48	40	423	32428337	32428729	5e-45
ctg146	CYC044D04	CYC044D04.r	chr5	89.76	166	17	219	384	32713101	32712936	2e-47
ctg146	CYC051I20	CYC051I20.f	chr5	90.3	134	10	237	367	32744989	32745122	1e-36
ctg146	CYC051I20	CYC051I20.r	chr5	86.08	309	31	391	698	32974586	32974289	7e-66
ctg146	CYC054E24	CYC054E24.r	chr23	89.25	93	9	235	326	20676038	20676130	3e-18
ctg146	CYC059G07	CYC059G07.f	chr5	85.19	439	50	269	696	32625433	32625867	9e-84
ctg146	CYC059G07	CYC059G07.r	chr5	87.79	385	33	76	459	32906835	32906464	7e-100
ctg146	CYC071G24	CYC071G24.f	chr5	91.18	238	21	47	284	32703213	32702976	9e-81
ctg146	CYC071G24	CYC071G24.r	chr5	83.23	161	16	281	438	32448749	32448901	4e-15
ctg146	CYC073C05	CYC073C05.f	chr5	87.5	96	12	78	173	33089511	33089416	1e-17
ctg146	CYC073C05	CYC073C05.r	chr5	84.82	191	29	168	358	32708595	32708785	6e-34
ctg146	CYC085G02	CYC085G02.f	chr5	93.57	140	3	490	623	32542472	32542611	1e-45
ctg146	CYC085G02	CYC085G02.r	chr5	86.44	118	16	572	689	32811702	32811585	4e-21
ctg146	CYC089G16	CYC089G16.f	chr1	97.67	43	1	140	182	7733852	7733810	2e-12
ctg1474	CYC005O16	CYC005O16.f	chr12	92.79	111	8	165	275	8391017	8391127	4e-36
ctg1474	CYC005O16	CYC005O16.r	chr12	85.03	314	26	1	307	8946250	8945951	9e-62
ctg1474	CYC012E21	CYC012E21.f	chr12	96.97	33	1	110	142	8503762	8503794	3e-06
ctg1474	CYC012E21	CYC012E21.r	chr12	90.14	71	7	471	541	8727118	8727048	1e-14
ctg148	CYC004H13	CYC004H13.f	chr2	82.08	240	23	213	437	46677734	46677968	2e-23
ctg148	CYC004H13	CYC004H13.r	chr2	85.19	243	25	410	641	47145166	47144924	1e-45
ctg148	CYC006M03	CYC006M03.r	chr14	91.06	123	11	1	123	42273925	42273803	4e-36
ctg148	CYC007N12	CYC007N12.f	chr2	91.47	211	16	132	340	47179185	47178975	5e-70
ctg148	CYC007N12	CYC007N12.r	chr2	90.71	280	26	42	321	46773778	46774057	6e-94
ctg148	CYC013B08	CYC013B08.f	chr14	89.19	296	25	510	798	41750526	41750821	2e-81
ctg148	CYC013B08	CYC013B08.r	chr14	93.07	274	19	55	328	42076107	42075834	4e-107
ctg148	CYC014C02	CYC014C02.f	chr14	95.74	47	2	611	657	43008259	43008213	3e-12
ctg148	CYC014C02	CYC014C02.r	chr14	86.86	312	35	1	308	42711844	42712153	8e-75
ctg148	CYC014P12	CYC014P12.f	chr13	80	435	81	201	633	15597547	15597977	2e-38
ctg148	CYC018N01	CYC018N01.f	chr14	80.56	144	28	8	151	21035901	21035758	5e-08
ctg148	CYC023A07	CYC023A07.f	chr21	100	28	0	83	110	14966085	14966112	9e-06
ctg148	CYC023A07	CYC023A07.r	chr2	100	34	0	43	76	46180312	46180345	4e-10
ctg148	CYC026A22	CYC026A22.f	chr14	86.93	436	49	170	603	41987612	41987183	8e-106
ctg148	CYC026A22	CYC026A22.r	chr14	85	380	40	46	412	41714095	41714470	5e-78
ctg148	CYC026A24	CYC026A24.f	chr7	96.23	53	2	445	497	45944378	45944326	1e-15
ctg148	CYC032M23	CYC032M23.f	chr14	87.04	216	27	568	782	42543573	42543788	2e-48
ctg148	CYC037K10	CYC037K10.f	chr14	85.71	77	11	545	621	42709190	42709114	1e-08
ctg148	CYC037K10	CYC037K10.r	chr13	83.33	138	16	110	240	16989163	16989026	1e-14
ctg148	CYC043O01	CYC043O01.f	chr17	92.45	53	4	240	292	23620283	23620231	5e-11
ctg148	CYC043O01	CYC043O01.r	chr2	93.52	108	7	429	536	46688970	46689077	1e-36
ctg148	CYC047C22	CYC047C22.f	chr1	95.12	41	1	99	139	23893298	23893337	4e-06
ctg148	CYC048K16	CYC048K16.f	chr16	100	27	0	81	107	9289465	9289439	7e-06
ctg148	CYC048K16	CYC048K16.r	chr15	84.96	113	17	413	525	1025059	1024947	9e-16
ctg148	CYC049A20	CYC049A20.f	chr3	88.57	70	8	86	155	30223663	30223594	4e-12
ctg148	CYC049A20	CYC049A20.r	chr22	91.78	73	5	416	487	6993931	6994003	8e-16
ctg148	CYC056E18	CYC056E18.f	chr20	90.54	74	7	352	425	3565817	3565890	3e-16
ctg148	CYC056E18	CYC056E18.r	chr3	96.36	55	1	127	181	34634957	34634904	6e-15
ctg148	CYC057G13	CYC057G13.f	chr14	85.41	425	39	344	761	41997079	41996671	3e-87
ctg148	CYC057G13	CYC057G13.r	chr14	91.49	94	6	1	94	41696929	41697020	4e-24
ctg148	CYC060K24	CYC060K24.r	chr22	100	31	0	475	505	5542057	5542027	2e-07
ctg148	CYC062C02	CYC062C02.f	chr13	89.6	125	13	114	238	22766931	22766807	2e-32
ctg148	CYC066G12	CYC066G12.r	chr5	96.39	83	3	45	127	72510252	72510170	1e-31
ctg148	CYC070B01	CYC070B01.f	chr2	84.8	421	55	150	562	47142355	47141936	7e-81
ctg148	CYC073J09	CYC073J09.f	chr11	91.73	133	11	129	261	13526479	13526611	4e-42
ctg148	CYC076I02	CYC076I02.f	chr17	91.8	61	5	68	128	45998370	45998310	3e-13
ctg148	CYC076I02	CYC076I02.r	chr24	79.87	318	53	143	456	12067031	12066721	2e-26
ctg148	CYC079O02	CYC079O02.f	chr14	89.16	286	27	84	367	42658162	42657879	5e-76
ctg148	CYC079O02	CYC079O02.r	chr14	86.85	479	50	20	488	42355533	42356008	4e-117
ctg148	CYC089F15	CYC089F15.r	chr14	87.66	154	16	544	694	41936082	41936235	3e-34
ctg148	CYC089O24	CYC089O24.f	chr17	100	29	0	360	388	38373913	38373941	3e-06
ctg148	CYC089O24	CYC089O24.r	chr14	92	125	10	194	318	42076365	42076489	1e-39
ctg148	CYC097A09	CYC097A09.r	chr14	81.45	345	49	12	344	41444677	41445018	2e-36
ctg148	CYC099D04	CYC099D04.r	chr14	91.12	214	18	204	416	41759060	41759273	5e-69
ctg1488	CYC014L15	CYC014L15.f	chr20	92.11	380	17	357	725	10305762	10306139	7e-140
ctg1488	CYC014L15	CYC014L15.r	chr20	88.68	53	6	364	416	10565117	10565065	3e-06
ctg1488	CYC029I02	CYC029I02.f	chr1	93.02	43	3	505	547	43391616	43391574	2e-07
ctg1488	CYC029I02	CYC029I02.r	chr20	87.63	97	12	414	510	10770922	10770826	3e-18
ctg1488	CYC038O11	CYC038O11.r	chr20	85.05	107	13	389	493	10870267	10870162	2e-10
ctg149	CYC004B01	CYC004B01.f	chr7	95.35	43	2	576	618	50113711	50113669	8e-10
ctg149	CYC004B01	CYC004B01.r	chr7	100	30	0	68	97	49820653	49820682	9e-08
ctg149	CYC005C01	CYC005C01.f	chr7	86.6	470	47	223	684	50711871	50711410	1e-113
ctg149	CYC011L02	CYC011L02.f	chr7	86.32	95	13	214	308	50744355	50744261	1e-14
ctg149	CYC011L02	CYC011L02.r	chr7	90.22	460	35	7	466	50436950	50437399	4e-153
ctg149	CYC019N23	CYC019N23.r	chr7	81.93	166	20	27	184	49810574	49810411	2e-07
ctg149	CYC022B07	CYC022B07.r	chr7	97.22	36	1	317	352	47555287	47555322	4e-08
ctg149	CYC023D16	CYC023D16.f	chr7	91.27	229	20	244	472	50436566	50436794	1e-77
ctg149	CYC023D16	CYC023D16.r	chr7	86.69	353	27	86	433	50801102	50800765	2e-84
ctg149	CYC024D19	CYC024D19.f	chr7	88.06	67	8	680	746	50008830	50008896	9e-10
ctg149	CYC024D19	CYC024D19.r	chr5	91.3	46	4	34	79	60386259	60386304	7e-07
ctg149	CYC025K11	CYC025K11.f	chr6	87.63	97	10	565	661	42117739	42117645	2e-13
ctg149	CYC025K11	CYC025K11.r	chr18	97.14	35	1	67	101	23601736	23601770	1e-07
ctg149	CYC028D20	CYC028D20.f	chr7	93.02	43	3	57	99	49739396	49739438	2e-07
ctg149	CYC028D20	CYC028D20.r	chr7	89.47	209	21	1	209	49945784	49945577	1e-58
ctg149	CYC032E07	CYC032E07.f	chr7	86.5	274	33	422	695	50473211	50473480	2e-60
ctg149	CYC032E07	CYC032E07.r	chr7	89.81	108	11	422	529	50772248	50772141	4e-27
ctg149	CYC034B10	CYC034B10.f	chr22	84.26	108	17	202	309	1877805	1877698	8e-13
ctg149	CYC034B10	CYC034B10.r	chr7	91.06	436	34	283	713	49487596	49487161	5e-156
ctg149	CYC034N05	CYC034N05.f	chr7	86.22	450	57	18	466	50132545	50132990	2e-106
ctg149	CYC034N05	CYC034N05.r	chr7	83.99	306	26	457	751	50373186	50372893	3e-62
ctg149	CYC047G03	CYC047G03.f	chr7	92.25	258	18	362	618	50537529	50537273	2e-90
ctg149	CYC047G03	CYC047G03.r	chr7	83.5	206	34	19	224	50275254	50275459	1e-30
ctg149	CYC047M11	CYC047M11.f	chr20	97.06	34	1	527	560	18184494	18184527	8e-07
ctg149	CYC047M11	CYC047M11.r	chr20	85.27	129	19	86	214	31266928	31266800	1e-20
ctg149	CYC052B04	CYC052B04.f	chr1	94.83	58	3	32	89	25702331	25702274	2e-16
ctg149	CYC052B04	CYC052B04.r	chr7	92.25	619	46	52	670	48775879	48776495	0
ctg149	CYC057D09	CYC057D09.r	chr17	87.76	98	10	164	259	26681510	26681607	6e-14
ctg149	CYC058O03	CYC058O03.f	chr7	92.67	150	10	243	392	50835615	50835467	9e-50
ctg149	CYC058O03	CYC058O03.r	chr7	91.6	119	10	45	163	50646283	50646401	5e-36
ctg149	CYC063O04	CYC063O04.f	chr4	87.4	127	16	607	733	54273223	54273349	2e-26
ctg149	CYC063O04	CYC063O04.r	chr9	83.8	142	21	283	422	14180303	14180444	6e-17
ctg149	CYC068F05	CYC068F05.f	chr7	86.77	597	31	1	589	48876954	48877510	1e-141
ctg149	CYC068F05	CYC068F05.r	chr7	85.07	221	30	372	591	49108080	49107862	8e-35
ctg149	CYC075A08	CYC075A08.f	chr7	93.12	218	12	3	220	49810685	49810899	3e-82
ctg149	CYC075E17	CYC075E17.f	chr7	96.21	132	5	83	214	50271375	50271244	9e-56
ctg149	CYC075E17	CYC075E17.r	chr2	88.34	283	32	113	394	34720854	34721136	1e-76
ctg149	CYC075F13	CYC075F13.f	chr7	85.44	158	13	96	243	50126432	50126275	3e-31
ctg149	CYC092A17	CYC092A17.f	chr7	89.88	326	28	202	523	49106655	49106979	9e-96
ctg149	CYC098N14	CYC098N14.f	chr15	86.75	249	33	27	275	25893050	25892802	9e-59
ctg149	CYC098N14	CYC098N14.r	chr15	86.54	208	22	53	258	25386364	25386567	6e-44
ctg149	CYC098N19	CYC098N19.r	chr19	96.36	55	2	58	112	2869964	2870018	6e-17
ctg149	CYC098N21	CYC098N21.f	chr9	97.44	39	1	338	376	35206116	35206078	4e-10
ctg1494	CYC017J02	CYC017J02.f	chr16	98.11	53	1	510	562	31956815	31956763	4e-18
ctg1494	CYC017J02	CYC017J02.r	chr16	95.65	46	2	478	523	31580984	31581029	1e-11
ctg1494	CYC017O18	CYC017O18.f	chr16	90.41	73	7	654	726	31811711	31811783	1e-15
ctg1494	CYC017O18	CYC017O18.r	chr5	100	32	0	410	441	30669808	30669777	4e-08
ctg1494	CYC022E17	CYC022E17.f	chr16	86.1	295	36	224	516	32407994	32407703	5e-64
ctg1494	CYC022E17	CYC022E17.r	chr18	94.74	38	2	159	196	26814958	26814995	9e-07
ctg1494	CYC025N20	CYC025N20.f	chr16	86.02	329	40	369	691	32526362	32526034	3e-68
ctg1494	CYC030C14	CYC030C14.f	chr16	91.03	78	7	648	725	31811711	31811788	1e-18
ctg1494	CYC030C14	CYC030C14.r	chr16	89.33	75	8	15	89	32216828	32216754	2e-14
ctg1494	CYC036E12	CYC036E12.f	chr16	90.62	96	9	1	96	32394245	32394150	1e-24
ctg1494	CYC046P07	CYC046P07.f	chr16	85.82	282	35	192	468	32616305	32616024	1e-58
ctg1494	CYC061E06	CYC061E06.f	chr5	92.77	83	6	36	118	72510252	72510170	2e-24
ctg1494	CYC061E06	CYC061E06.r	chr16	92.78	180	13	407	586	32023774	32023595	2e-65
ctg1494	CYC062I06	CYC062I06.f	chr16	86.75	151	16	100	246	31800585	31800735	5e-28
ctg1494	CYC062I06	CYC062I06.r	chr15	100	30	0	176	205	21310147	21310118	8e-07
ctg1494	CYC063F11	CYC063F11.f	chr16	89.33	75	8	12	86	32216828	32216754	1e-14
ctg1494	CYC087A20	CYC087A20.f	chr16	88.59	184	21	163	346	31535140	31535323	2e-48
ctg1494	CYC087A20	CYC087A20.r	chr16	87.5	184	23	418	601	31813418	31813235	8e-44
ctg1494	CYC098H17	CYC098H17.f	chr16	85.84	113	9	425	537	31539438	31539543	2e-16
ctg1494	CYC098H17	CYC098H17.r	chr14	90.21	143	14	181	323	38105866	38106008	6e-41
ctg1494	CYC098O21	CYC098O21.r	chr16	90.91	88	7	199	286	31753152	31753238	5e-20
ctg1494	CYC099E19	CYC099E19.f	chr16	84.33	134	21	38	171	32329347	32329214	1e-18
ctg1494	CYC099E19	CYC099E19.r	chr16	92.41	145	11	413	557	31800747	31800891	3e-49
ctg1501	CYC005J14	CYC005J14.f	chr9	86.81	766	69	9	751	12188484	12187728	0
ctg1501	CYC005J14	CYC005J14.r	chr9	92.52	147	11	189	335	11946221	11946367	2e-50
ctg1501	CYC005P13	CYC005P13.f	chr9	92.68	41	3	109	149	11946021	11945981	4e-06
ctg1501	CYC005P13	CYC005P13.r	chr23	84.09	88	14	310	397	25301552	25301465	6e-08
ctg1501	CYC011N15	CYC011N15.f	chr2	88.18	110	10	199	308	22460275	22460381	3e-19
ctg1501	CYC011N15	CYC011N15.r	chr9	84.55	246	24	113	355	12235397	12235163	2e-38
ctg1501	CYC013A22	CYC013A22.r	chr9	88.89	144	15	1	144	11263600	11263742	1e-34
ctg1501	CYC016D11	CYC016D11.f	chr9	88.24	272	32	1	272	12038818	12038547	8e-75
ctg1501	CYC016D11	CYC016D11.r	chr9	94.74	38	2	400	437	11823158	11823195	8e-07
ctg1501	CYC016M10	CYC016M10.f	chr14	88.72	133	15	359	491	911126	911258	2e-32
ctg1501	CYC016M10	CYC016M10.r	chr2	87.13	101	11	177	277	11824828	11824730	2e-13
ctg1501	CYC033O02	CYC033O02.f	chr9	87.28	283	36	46	328	11397544	11397826	1e-61
ctg1501	CYC034G16	CYC034G16.f	chr16	100	30	0	786	815	19453256	19453285	1e-06
ctg1501	CYC034G16	CYC034G16.r	chr9	86.39	316	39	429	743	11652504	11652816	3e-68
ctg1501	CYC038L10	CYC038L10.f	chr2	97.22	36	1	677	712	41940293	41940328	6e-08
ctg1501	CYC038L10	CYC038L10.r	chr9	91.03	234	21	1	234	12396669	12396902	2e-78
ctg1501	CYC045G17	CYC045G17.f	chr9	96.63	178	6	467	644	12642872	12642695	1e-80
ctg1501	CYC045G17	CYC045G17.r	chr9	94.18	189	10	329	516	12299900	12300088	5e-73
ctg1501	CYC046D23	CYC046D23.f	chr9	88	150	18	597	746	11896647	11896498	2e-35
ctg1501	CYC046D23	CYC046D23.r	chr9	91.06	235	21	1	235	11570050	11570284	5e-79
ctg1501	CYC054E18	CYC054E18.f	chr9	92.08	101	8	13	113	12117927	12118027	4e-30
ctg1501	CYC054J20	CYC054J20.f	chr5	91.3	46	4	462	507	48997466	48997511	7e-07
ctg1501	CYC055K15	CYC055K15.f	chr1	86.57	67	9	65	131	47068952	47068886	2e-07
ctg1501	CYC057N18	CYC057N18.f	chr22	84.27	89	14	336	424	1877796	1877708	1e-08
ctg1501	CYC057N18	CYC057N18.r	chr5	89.8	49	5	1	49	57546448	57546400	2e-06
ctg1501	CYC059D03	CYC059D03.f	chr9	86.92	451	44	1	447	12309318	12309757	4e-111
ctg1501	CYC059D03	CYC059D03.r	chr9	88.73	213	24	100	312	12588952	12588740	1e-58
ctg1501	CYC060L14	CYC060L14.f	chr9	83.28	311	40	1	301	11900016	11900324	1e-45
ctg1501	CYC060L14	CYC060L14.r	chr9	86.81	91	12	658	748	12202573	12202483	2e-14
ctg1501	CYC063F12	CYC063F12.r	chr23	84.5	129	16	483	607	27472512	27472640	1e-17
ctg1501	CYC065E21	CYC065E21.f	chr9	87.38	214	26	353	565	11671523	11671310	9e-50
ctg1501	CYC069I16	CYC069I16.f	chr2	87.13	101	11	175	275	11824828	11824730	2e-13
ctg1501	CYC080M05	CYC080M05.f	chr14	97.06	34	1	155	188	30945682	30945649	1e-06
ctg1501	CYC082A08	CYC082A08.r	chr6	93.02	43	3	291	333	24375970	24375928	2e-07
ctg1501	CYC082F01	CYC082F01.f	chr4	92.73	110	8	2	111	29642678	29642569	2e-35
ctg1501	CYC092A15	CYC092A15.f	chr14	84.19	215	28	8	217	3773807	3774020	2e-34
ctg1501	CYC092A15	CYC092A15.r	chr14	88.51	235	27	17	251	3917407	3917173	5e-65
ctg1501	CYC093C11	CYC093C11.f	chr19	93.62	47	0	285	328	829087	829041	1e-08
ctg1501	CYC093J04	CYC093J04.f	chr2	94.59	37	2	129	165	55665941	55665977	3e-06
ctg1501	CYC093J04	CYC093J04.r	chr7	100	46	0	231	276	74083186	74083231	2e-16
ctg1501	CYC134E21	CYC134E21.f	chr3	95.31	64	3	317	380	30223600	30223663	5e-20
ctg1511	CYC011I10	CYC011I10.f	chr7	87.01	77	10	621	697	21714509	21714433	6e-11
ctg1511	CYC011I10	CYC011I10.r	chr7	93.59	78	5	77	154	21485961	21486038	2e-23
ctg1511	CYC022I12	CYC022I12.f	chr20	96.97	33	1	214	246	3902175	3902143	3e-06
ctg1511	CYC022I12	CYC022I12.r	chr7	83.26	436	51	185	603	21275525	21275955	1e-64
ctg1511	CYC029H04	CYC029H04.f	chr7	86.31	314	30	379	692	21587757	21588057	1e-61
ctg1511	CYC029H04	CYC029H04.r	chr5	97.83	46	1	553	598	57331416	57331461	6e-14
ctg1511	CYC030P07	CYC030P07.f	chr7	97.53	81	2	215	295	21436165	21436085	2e-32
ctg1511	CYC030P07	CYC030P07.r	chr5	95.45	44	2	84	127	49770823	49770780	1e-10
ctg1511	CYC059H24	CYC059H24.f	chr12	86.14	166	23	521	686	2798532	2798367	5e-33
ctg1511	CYC059H24	CYC059H24.r	chr7	87.74	106	9	229	333	21330587	21330689	2e-14
ctg1511	CYC062N04	CYC062N04.f	chr9	93.33	45	3	411	455	24155329	24155285	1e-08
ctg1511	CYC062N04	CYC062N04.r	chr7	83.56	225	34	4	228	21495426	21495647	1e-33
ctg1511	CYC079I02	CYC079I02.f	chr7	88.49	139	16	170	308	21474013	21474151	9e-34
ctg1511	CYC131G16	CYC131G16.r	chr7	91.8	122	10	261	382	21830997	21830876	6e-38
ctg1511	CYC133C23	CYC133C23.f	chr2	94.64	56	2	685	740	56177967	56178021	1e-12
ctg1512	CYC004C09	CYC004C09.r	chr15	86.14	166	22	367	532	17649935	17649771	1e-30
ctg1512	CYC015C12	CYC015C12.f	chr10	100	30	0	318	347	39103219	39103248	8e-07
ctg1512	CYC015C12	CYC015C12.r	chr5	93.33	45	3	119	163	14803582	14803538	1e-08
ctg1512	CYC015N05	CYC015N05.f	chr20	96.7	91	2	682	772	16889356	16889445	1e-33
ctg1512	CYC017N02	CYC017N02.r	chr7	85.71	70	10	489	558	19516214	19516145	9e-07
ctg1512	CYC024I17	CYC024I17.f	chr15	85.16	182	27	126	307	30371319	30371138	5e-33
ctg1512	CYC039N10	CYC039N10.r	chr10	91.11	45	4	218	262	9758682	9758726	4e-06
ctg1512	CYC048B16	CYC048B16.f	chr16	93.41	91	6	1	91	28931357	28931267	7e-29
ctg1512	CYC048B16	CYC048B16.r	chr16	92.05	176	14	249	424	28681127	28681302	2e-60
ctg1512	CYC061I06	CYC061I06.f	chr1	95	40	2	404	443	10746957	10746996	5e-08
ctg1512	CYC061I06	CYC061I06.r	chr18	93.22	59	4	659	717	34310904	34310962	2e-14
ctg1512	CYC064B07	CYC064B07.r	chr15	82.86	105	18	380	484	4478803	4478907	1e-08
ctg1512	CYC072H12	CYC072H12.f	chr10	83.43	362	59	105	466	16368676	16369036	3e-59
ctg1512	CYC072H12	CYC072H12.r	chr3	84.39	506	63	144	649	29371069	29370580	5e-82
ctg1512	CYC073E10	CYC073E10.f	chr7	96.97	33	1	21	53	37555078	37555046	3e-06
ctg1512	CYC079J22	CYC079J22.f	chr20	97.62	42	1	20	61	43116793	43116834	2e-11
ctg1512	CYC079J22	CYC079J22.r	chr3	97.22	36	1	360	395	33933501	33933536	4e-08
ctg1512	CYC091O22	CYC091O22.f	chr24	86.76	68	9	12	79	4520676	4520743	6e-08
ctg1512	CYC095M06	CYC095M06.f	chr8	87.93	58	7	224	281	5921381	5921324	7e-07
ctg1512	CYC095M06	CYC095M06.r	chr4	85.49	193	27	408	600	14854551	14854742	7e-35
ctg1512	CYC132I07	CYC132I07.f	chr18	92.09	177	14	237	413	30245268	30245444	3e-61
ctg1512	CYC132I07	CYC132I07.r	chr4	83.85	421	56	1	414	26270200	26270615	3e-73
ctg1515	CYC012H07	CYC012H07.f	chr5	95.65	46	2	584	629	17958557	17958512	1e-11
ctg1515	CYC054P23	CYC054P23.r	chr6	90.91	55	5	495	549	38351144	38351198	7e-10
ctg1515	CYC100M17	CYC100M17.f	chr12	97.06	34	1	389	422	14273829	14273796	8e-07
ctg1515	CYC100M17	CYC100M17.r	chr10	91.38	58	5	346	403	20948765	20948708	1e-11
ctg152	CYC004D18	CYC004D18.f	chr1	91.3	46	4	406	451	6663658	6663703	9e-07
ctg152	CYC004D18	CYC004D18.r	chr1	88.89	252	26	255	505	6556414	6556164	1e-67
ctg152	CYC012E11	CYC012E11.f	chr25	85.95	185	26	106	290	23226063	23226247	3e-37
ctg152	CYC012E11	CYC012E11.r	chr1	95.16	62	3	209	270	6217336	6217275	7e-19
ctg152	CYC024M13	CYC024M13.r	chr1	91.3	46	4	407	452	6663658	6663703	9e-07
ctg152	CYC027J10	CYC027J10.f	chr1	86.96	92	10	34	123	6995629	6995720	3e-13
ctg152	CYC027J10	CYC027J10.r	chr1	87.3	126	14	232	357	6772190	6772067	4e-24
ctg152	CYC032I21	CYC032I21.f	chr1	87.69	195	15	50	243	6613356	6613542	2e-47
ctg152	CYC032I21	CYC032I21.r	chr1	90.24	123	12	588	710	6492617	6492495	1e-33
ctg152	CYC037I22	CYC037I22.f	chr1	90.29	278	25	236	511	6429037	6428760	1e-85
ctg152	CYC037I22	CYC037I22.r	chr1	89.12	285	31	149	433	6682699	6682983	5e-85
ctg152	CYC038H18	CYC038H18.f	chr1	97.22	36	1	426	461	6518813	6518848	5e-08
ctg152	CYC038H18	CYC038H18.r	chr1	87.76	245	26	365	606	6179569	6179812	5e-57
ctg152	CYC040F06	CYC040F06.f	chr1	91.64	299	21	299	593	5937711	5938009	1e-94
ctg152	CYC042B10	CYC042B10.f	chr1	90.42	167	16	70	236	6251222	6251388	2e-50
ctg152	CYC042B10	CYC042B10.r	chr17	87.01	77	10	109	185	44836029	44836105	1e-11
ctg152	CYC058B09	CYC058B09.f	chr5	93.18	44	3	354	397	59064647	59064690	6e-08
ctg152	CYC061I22	CYC061I22.f	chr1	89.52	105	11	513	617	6348212	6348108	3e-25
ctg152	CYC061I22	CYC061I22.r	chr1	91.67	120	10	337	456	6137589	6137470	1e-36
ctg152	CYC064F02	CYC064F02.f	chr1	90.14	71	6	355	424	6746662	6746592	3e-12
ctg152	CYC064F02	CYC064F02.r	chr1	90.43	324	30	364	687	7024818	7025140	7e-106
ctg152	CYC072B19	CYC072B19.f	chr1	90.59	404	23	1	401	6598121	6598512	3e-133
ctg152	CYC072B19	CYC072B19.r	chr1	87.6	121	15	200	320	6516186	6516066	5e-13
ctg155	CYC005J09	CYC005J09.r	chr8	84.47	103	14	560	661	39154181	39154080	2e-07
ctg155	CYC006K13	CYC006K13.r	chr23	80.7	171	32	187	357	4970698	4970867	8e-10
ctg155	CYC015I05	CYC015I05.f	chr6	92.98	57	4	525	581	4982375	4982319	2e-13
ctg155	CYC015J21	CYC015J21.f	chr23	86.11	108	15	323	430	13028270	13028163	2e-17
ctg155	CYC019J03	CYC019J03.f	chr6	90.1	101	10	7	107	15773005	15772905	3e-25
ctg155	CYC020O18	CYC020O18.f	chr4	100	31	0	80	110	8062756	8062726	2e-07
ctg155	CYC020O18	CYC020O18.r	chr24	94.74	76	4	295	370	21029850	21029775	1e-24
ctg155	CYC021G22	CYC021G22.f	chr12	96.65	179	6	400	578	14295774	14295952	2e-81
ctg155	CYC021G22	CYC021G22.r	chr1	100	29	0	609	637	8077116	8077088	3e-06
ctg155	CYC026I17	CYC026I17.f	chr20	94.87	39	2	667	705	25243374	25243336	3e-07
ctg155	CYC026I17	CYC026I17.r	chr23	86.9	290	35	1	289	4950327	4950614	2e-67
ctg155	CYC027K07	CYC027K07.r	chr23	83.33	114	18	87	199	4482990	4483103	4e-09
ctg155	CYC031L17	CYC031L17.f	chr24	93.18	44	3	689	732	34348951	34348994	6e-08
ctg155	CYC031L17	CYC031L17.r	chr23	82.64	121	14	269	389	4674684	4674797	3e-12
ctg155	CYC032H24	CYC032H24.r	chr14	86.15	130	18	65	194	32651565	32651694	2e-23
ctg155	CYC038E17	CYC038E17.f	chr25	94.59	37	2	707	743	33233665	33233701	4e-06
ctg155	CYC038E17	CYC038E17.r	chr20	84.92	126	8	448	568	37513143	37513262	2e-19
ctg155	CYC041O22	CYC041O22.f	chr1	93.71	286	18	1	286	35526536	35526251	8e-117
ctg155	CYC045K02	CYC045K02.r	chr1	82.88	625	67	1	594	35203128	35203743	6e-85
ctg155	CYC053B03	CYC053B03.r	chr3	94.34	53	3	131	183	27259002	27259054	2e-13
ctg155	CYC054F19	CYC054F19.f	chr13	95.45	44	2	217	260	42360193	42360236	2e-10
ctg155	CYC054F19	CYC054F19.r	chr14	92.68	41	3	49	89	43710424	43710384	3e-06
ctg155	CYC055M19	CYC055M19.r	chr10	96.23	53	2	483	535	23227433	23227485	7e-16
ctg155	CYC056L09	CYC056L09.f	chr17	91.69	337	25	296	630	30772011	30772346	5e-119
ctg155	CYC061C03	CYC061C03.f	chr5	90.74	54	5	249	302	26576561	26576508	3e-09
ctg155	CYC061D03	CYC061D03.r	chr24	89.23	195	13	22	209	21113646	21113453	3e-54
ctg155	CYC064J02	CYC064J02.f	chr13	100	31	0	385	415	8322853	8322883	2e-07
ctg155	CYC064J02	CYC064J02.r	chr8	89.06	64	7	360	423	55826990	55826927	2e-10
ctg155	CYC070N12	CYC070N12.f	chr19	88.31	77	9	359	435	38517675	38517599	2e-13
ctg155	CYC070N12	CYC070N12.r	chr2	87.18	78	10	476	553	13482370	13482447	1e-11
ctg155	CYC072N04	CYC072N04.f	chr24	91.67	72	6	240	311	20846125	20846196	2e-17
ctg155	CYC072N04	CYC072N04.r	chr24	90.91	88	8	215	302	21149921	21149834	2e-22
ctg155	CYC074E23	CYC074E23.f	chr20	87.97	241	26	27	265	37900693	37900932	3e-59
ctg155	CYC084K02	CYC084K02.f	chr20	82.08	173	26	568	740	38206828	38206661	4e-15
ctg155	CYC084K02	CYC084K02.r	chr20	88.43	121	14	182	302	37850408	37850528	1e-27
ctg155	CYC085D13	CYC085D13.r	chr2	87.25	102	11	533	632	28552055	28552156	6e-17
ctg155	CYC096E04	CYC096E04.f	chr19	97.83	46	1	483	528	37593550	37593595	6e-14
ctg155	CYC096E04	CYC096E04.r	chr23	88.97	145	13	81	222	4871377	4871521	4e-33
ctg155	CYC100E10	CYC100E10.f	chr24	94.92	177	9	388	564	21157259	21157083	5e-73
ctg155	CYC100E10	CYC100E10.r	chr6	91.67	72	6	327	398	27635013	27635084	8e-18
ctg1562	CYC010C04	CYC010C04.f	chr3	90.68	118	11	1	118	18691180	18691063	5e-33
ctg1562	CYC013C07	CYC013C07.r	chr3	87.08	178	20	522	699	18673736	18673562	5e-39
ctg1562	CYC014J18	CYC014J18.f	chr3	91.74	121	10	2	122	18515852	18515732	3e-37
ctg1562	CYC014J18	CYC014J18.r	chr7	91.04	67	5	182	248	53110547	53110612	3e-12
ctg1562	CYC031K16	CYC031K16.f	chr23	94.12	51	3	38	88	41504568	41504618	4e-12
ctg1562	CYC031K16	CYC031K16.r	chr3	87.59	137	17	1	137	18276236	18276372	5e-30
ctg1562	CYC075H03	CYC075H03.f	chr3	88.57	175	20	513	687	18673736	18673562	1e-45
ctg1562	CYC075H03	CYC075H03.r	chr10	90.22	92	9	1	92	26319382	26319291	2e-22
ctg1562	CYC087E16	CYC087E16.f	chr23	94.12	51	3	39	89	41504568	41504618	4e-12
ctg1562	CYC087E16	CYC087E16.r	chr3	86.78	174	20	522	695	18673736	18673566	1e-36
ctg1563	CYC011C07	CYC011C07.r	chr6	86.6	97	13	545	641	5868579	5868483	9e-16
ctg1563	CYC017E03	CYC017E03.r	chr14	94.2	69	4	246	314	42208331	42208263	1e-20
ctg1563	CYC053H03	CYC053H03.f	chr6	92.39	368	25	296	661	5942161	5941795	2e-137
ctg1563	CYC081K16	CYC081K16.f	chr6	93.94	231	14	288	518	5868059	5867829	2e-93
ctg1563	CYC084E13	CYC084E13.f	chr9	85.88	85	12	141	225	9424713	9424629	6e-11
ctg1563	CYC084E13	CYC084E13.r	chr21	93.48	46	3	1	46	6977714	6977669	2e-09
ctg1563	CYC089A18	CYC089A18.f	chr6	81.21	330	40	92	415	6130288	6129975	3e-33
ctg1563	CYC089A18	CYC089A18.r	chr6	84.69	98	14	39	136	5868483	5868579	1e-09
ctg1563	CYC134E22	CYC134E22.f	chr6	94.9	314	15	5	317	5959654	5959341	9e-136
ctg1563	CYC134E22	CYC134E22.r	chr15	90.36	83	8	244	326	37776391	37776309	1e-19
ctg157	CYC004K22	CYC004K22.f	chr15	87.96	108	12	416	523	22265557	22265663	7e-20
ctg157	CYC005O22	CYC005O22.f	chr4	88.78	98	11	400	497	58412258	58412355	4e-21
ctg157	CYC007I01	CYC007I01.f	chr6	87.5	96	11	551	646	26154968	26155062	4e-15
ctg157	CYC018J16	CYC018J16.r	chr9	89.66	58	6	274	331	32988027	32987970	3e-09
ctg157	CYC023P08	CYC023P08.f	chr19	91.11	45	4	699	743	12199708	12199664	4e-06
ctg157	CYC023P08	CYC023P08.r	chr4	84.04	683	109	48	730	61331393	61330711	4e-126
ctg157	CYC026K16	CYC026K16.r	chr19	82.02	267	48	3	269	8562307	8562573	6e-34
ctg157	CYC036J23	CYC036J23.f	chr4	95.58	113	5	645	757	42401071	42401183	2e-44
ctg157	CYC036J23	CYC036J23.r	chr11	85.71	126	18	361	486	46619396	46619271	4e-21
ctg157	CYC036P12	CYC036P12.f	chr7	96.88	32	1	100	131	58729362	58729393	1e-05
ctg157	CYC036P12	CYC036P12.r	chr7	91.67	48	4	519	566	3250398	3250445	5e-08
ctg157	CYC040B24	CYC040B24.r	chr5	96.97	33	1	332	364	50354023	50354055	3e-06
ctg157	CYC040K16	CYC040K16.f	chr8	87.93	58	7	141	198	22287804	22287747	9e-07
ctg157	CYC040K16	CYC040K16.r	chr12	91.84	49	4	643	691	13444044	13444092	1e-08
ctg157	CYC046O08	CYC046O08.f	chr4	80.29	340	66	449	788	61362522	61362184	2e-29
ctg157	CYC049I17	CYC049I17.f	chr4	85.8	521	74	2	522	61333504	61332984	4e-123
ctg157	CYC049I17	CYC049I17.r	chr17	100	30	0	108	137	18500763	18500734	8e-07
ctg157	CYC049L21	CYC049L21.f	chr22	88.68	53	6	602	654	24821852	24821904	3e-06
ctg157	CYC049L21	CYC049L21.r	chr15	87.5	112	14	359	470	856169	856280	3e-22
ctg157	CYC056C20	CYC056C20.f	chr1	83.7	135	20	371	504	27080154	27080287	3e-12
ctg157	CYC056C20	CYC056C20.r	chr3	86.17	94	11	291	382	27868604	27868697	3e-09
ctg157	CYC068K08	CYC068K08.r	chr11	85.71	126	18	361	486	46619396	46619271	4e-21
ctg157	CYC085D11	CYC085D11.r	chr9	91.32	726	54	4	721	30416419	30417143	0
ctg157	CYC099A03	CYC099A03.f	chr24	88.62	290	32	433	721	10501632	10501921	9e-81
ctg157	CYC133J01	CYC133J01.f	chr7	87.18	117	13	463	578	74924660	74924775	3e-18
ctg157	CYC133J01	CYC133J01.r	chr11	89.29	84	9	1	84	16030982	16031065	1e-17
ctg157	CYC139C20	CYC139C20.f	chr11	92.86	42	3	707	748	29650606	29650565	9e-07
ctg1590	CYC026N24	CYC026N24.f	chr20	97.59	83	2	156	238	4378240	4378322	1e-33
ctg1590	CYC026N24	CYC026N24.r	chr5	83.62	177	28	439	614	51070876	51071052	7e-23
ctg1590	CYC047N03	CYC047N03.r	chr20	92.31	130	10	435	564	4664081	4663952	1e-42
ctg1590	CYC136D15	CYC136D15.f	chr20	94.59	111	6	387	497	4634043	4634153	6e-41
ctg1590	CYC136D15	CYC136D15.r	chr20	93.24	74	5	1	74	5061148	5061075	1e-21
ctg1593	CYC017H06	CYC017H06.f	chr24	90.57	106	10	143	248	18242121	18242226	3e-28
ctg1593	CYC017H06	CYC017H06.r	chr24	87.73	220	26	469	687	18438433	18438214	2e-53
ctg1593	CYC023F19	CYC023F19.f	chr24	86.69	248	27	96	341	17788429	17788672	1e-52
ctg1593	CYC023F19	CYC023F19.r	chr24	85.78	218	30	55	272	17995270	17995054	2e-42
ctg1593	CYC045B21	CYC045B21.f	chr24	94.59	37	2	1	37	18296382	18296418	4e-06
ctg1593	CYC045I10	CYC045I10.f	chr24	89.23	195	21	7	201	18536810	18536616	4e-55
ctg1593	CYC045I10	CYC045I10.r	chr24	86.13	137	18	406	541	18207818	18207954	7e-23
ctg1593	CYC055D11	CYC055D11.f	chr14	90.85	142	13	199	340	38105867	38106008	1e-42
ctg1593	CYC055D11	CYC055D11.r	chr24	91.36	162	12	1	162	18096352	18096193	2e-50
ctg1593	CYC131I15	CYC131I15.r	chr24	86.96	184	23	177	360	18199256	18199438	5e-39
ctg16	CYC004P03	CYC004P03.f	chr7	93.62	47	3	312	358	70285629	70285583	8e-10
ctg16	CYC004P03	CYC004P03.r	chr6	91.36	81	7	498	578	3651344	3651264	1e-20
ctg16	CYC006H11	CYC006H11.f	chr20	92.92	212	15	216	427	1559088	1558877	2e-79
ctg16	CYC006H11	CYC006H11.r	chr2	88.89	54	6	323	376	11904158	11904211	9e-07
ctg16	CYC007M05	CYC007M05.f	chr17	82.17	230	20	72	280	43525966	43525737	8e-38
ctg16	CYC010H14	CYC010H14.f	chr1	97.54	122	3	13	134	16003561	16003682	1e-54
ctg16	CYC010H14	CYC010H14.r	chr1	88.35	498	44	3	490	16194179	16193686	4e-135
ctg16	CYC013B05	CYC013B05.r	chr12	87.69	130	15	428	557	44166906	44166778	7e-26
ctg16	CYC013K14	CYC013K14.f	chr20	93.33	135	9	475	609	688154	688020	7e-48
ctg16	CYC013K14	CYC013K14.r	chr17	82.17	230	20	61	269	43525966	43525737	8e-38
ctg16	CYC019H18	CYC019H18.f	chr1	88.24	68	6	2	69	15880683	15880748	1e-08
ctg16	CYC019H18	CYC019H18.r	chr1	86.18	427	51	189	609	16143577	16143153	8e-93
ctg16	CYC027K21	CYC027K21.f	chr22	88.13	733	81	19	747	4471660	4470930	0
ctg16	CYC029B01	CYC029B01.r	chr20	89.08	229	25	70	298	690452	690680	7e-66
ctg16	CYC034H14	CYC034H14.r	chr20	93.2	147	10	193	339	764259	764113	1e-52
ctg16	CYC041M01	CYC041M01.r	chr20	82.99	147	23	136	280	1174720	1174574	3e-15
ctg16	CYC043K13	CYC043K13.r	chr6	95.56	45	2	440	484	13081626	13081582	4e-11
ctg16	CYC044F22	CYC044F22.f	chr6	86.96	92	10	484	573	27449767	27449676	2e-10
ctg16	CYC048J17	CYC048J17.r	chr9	93.65	63	4	126	188	39061562	39061624	5e-17
ctg16	CYC049O08	CYC049O08.r	chr20	93.48	92	3	696	786	3001067	3001156	3e-25
ctg16	CYC055O05	CYC055O05.f	chr6	88.1	84	10	700	783	30276263	30276180	4e-15
ctg16	CYC055O05	CYC055O05.r	chr13	100	28	0	143	170	28621854	28621881	3e-06
ctg16	CYC057A24	CYC057A24.r	chr10	92.68	41	3	267	307	19291379	19291339	2e-06
ctg16	CYC057I02	CYC057I02.f	chr19	87.04	108	11	224	328	17862322	17862215	9e-19
ctg16	CYC057M04	CYC057M04.f	chr16	91.8	61	5	637	697	22747715	22747655	3e-13
ctg16	CYC057M04	CYC057M04.r	chr20	85.42	96	14	536	631	711004	710909	9e-13
ctg16	CYC060B07	CYC060B07.f	chr20	97.54	122	3	147	268	708360	708239	2e-54
ctg16	CYC060B07	CYC060B07.r	chr3	97.06	34	1	70	103	56768610	56768643	8e-07
ctg16	CYC071A08	CYC071A08.f	chr1	90.68	118	11	189	306	15235986	15236103	5e-33
ctg16	CYC071A08	CYC071A08.r	chr2	94.87	39	2	648	686	49896931	49896893	2e-07
ctg16	CYC071L18	CYC071L18.r	chr1	93.85	195	11	295	489	16388711	16388518	2e-74
ctg16	CYC080N04	CYC080N04.r	chr20	94.68	94	5	395	488	24384263	24384170	5e-33
ctg16	CYC084J20	CYC084J20.r	chr14	86	100	14	379	478	51316653	51316554	3e-15
ctg16	CYC085N14	CYC085N14.f	chr1	94.69	113	3	492	601	15222123	15222011	8e-41
ctg16	CYC086F08	CYC086F08.r	chr15	96.08	51	2	149	199	11327450	11327500	7e-15
ctg16	CYC087D17	CYC087D17.f	chr3	96.15	52	2	473	524	34634955	34634904	4e-15
ctg16	CYC087D17	CYC087D17.r	chr8	100	34	0	452	485	37003835	37003802	3e-09
ctg16	CYC087L04	CYC087L04.r	chr16	94.74	38	2	448	485	9954159	9954122	8e-07
ctg16	CYC098G21	CYC098G21.r	chr7	89.47	76	8	463	538	6718173	6718248	3e-15
ctg16	CYC100E23	CYC100E23.f	chr20	93.97	116	7	24	139	1324224	1324339	2e-41
ctg16	CYC131O03	CYC131O03.r	chr3	96.15	52	2	562	613	34634955	34634904	3e-15
ctg16	CYC135E08	CYC135E08.r	chr22	93.33	45	3	120	164	17469163	17469207	5e-09
ctg16	CYC139B13	CYC139B13.f	chr9	93.65	63	4	123	185	39061562	39061624	7e-17
ctg16	CYC139B13	CYC139B13.r	chr3	89.23	65	7	219	283	30223663	30223599	4e-11
ctg1641	CYC017H11	CYC017H11.r	chr5	86.11	72	10	306	377	47395522	47395451	5e-08
ctg1641	CYC028E07	CYC028E07.f	chr13	89.33	75	8	256	330	25923486	25923412	2e-14
ctg1641	CYC028E07	CYC028E07.r	chr25	88.1	269	31	370	638	9380174	9379907	1e-70
ctg1641	CYC030I11	CYC030I11.f	chr25	89.17	120	12	668	787	9033563	9033681	5e-27
ctg1641	CYC030I11	CYC030I11.r	chr25	92.41	79	6	414	492	9201290	9201212	1e-21
ctg1641	CYC051P04	CYC051P04.f	chr8	96.97	33	1	457	489	26498183	26498151	3e-06
ctg1641	CYC051P04	CYC051P04.r	chr19	94.55	55	2	463	517	24576807	24576860	4e-12
ctg1641	CYC054D11	CYC054D11.f	chr19	94.55	55	2	32	86	24576807	24576860	3e-12
ctg1641	CYC054D11	CYC054D11.r	chr8	96.97	33	1	411	443	26498183	26498151	3e-06
ctg1641	CYC081G14	CYC081G14.f	chr25	92.68	205	15	258	462	9139179	9138975	1e-75
ctg1641	CYC081G14	CYC081G14.r	chr12	94	50	3	574	623	7409621	7409670	1e-11
ctg1641	CYC085M13	CYC085M13.f	chr25	88.49	139	16	455	593	9168601	9168463	1e-33
ctg1641	CYC085M13	CYC085M13.r	chr25	92.31	143	11	3	145	8996128	8996270	6e-48
ctg1641	CYC097C11	CYC097C11.r	chr25	79.85	273	43	3	272	8914185	8914448	5e-16
ctg1641	CYC100K21	CYC100K21.r	chr14	91.84	49	4	83	131	7954474	7954522	1e-08
ctg165	CYC004F05	CYC004F05.f	chr7	87.6	121	13	254	374	17577081	17576963	2e-23
ctg165	CYC004F05	CYC004F05.r	chr7	96.97	33	1	229	261	17387469	17387501	3e-06
ctg165	CYC014O21	CYC014O21.f	chr7	96.64	119	3	388	505	17944170	17944052	5e-48
ctg165	CYC014O21	CYC014O21.r	chr7	84.47	161	9	345	502	17642102	17642249	5e-29
ctg165	CYC025C03	CYC025C03.r	chr7	84.1	195	31	543	737	17994636	17994442	3e-31
ctg165	CYC028G11	CYC028G11.f	chr7	93.85	195	12	350	544	18010701	18010507	1e-76
ctg165	CYC028G11	CYC028G11.r	chr7	95	60	3	163	222	17753927	17753986	2e-17
ctg165	CYC039N22	CYC039N22.f	chr7	84.47	161	9	317	474	17642102	17642249	5e-29
ctg165	CYC039N22	CYC039N22.r	chr7	93.2	147	10	47	193	17875367	17875221	9e-53
ctg165	CYC070M20	CYC070M20.r	chr7	86.21	174	22	354	526	17717297	17717469	9e-31
ctg165	CYC071O19	CYC071O19.f	chr9	92.68	41	3	317	357	43546945	43546985	2e-06
ctg165	CYC071O19	CYC071O19.r	chr7	96.97	66	1	1	66	17805654	17805590	1e-21
ctg165	CYC072M18	CYC072M18.r	chr7	92.21	154	12	97	250	18691992	18691839	4e-52
ctg165	CYC081L16	CYC081L16.f	chr7	96.64	119	3	386	503	17944170	17944052	6e-48
ctg165	CYC081L16	CYC081L16.r	chr7	86.21	174	22	405	577	17717297	17717469	1e-30
ctg165	CYC099J18	CYC099J18.f	chr7	89.16	203	22	152	354	17784423	17784625	2e-57
ctg165	CYC099J18	CYC099J18.r	chr7	92.36	484	37	92	575	18006059	18005576	0
ctg1662	CYC005K17	CYC005K17.f	chr25	100	31	0	424	454	13345587	13345557	2e-07
ctg1662	CYC005K17	CYC005K17.r	chr11	97.44	39	1	83	121	12198569	12198531	9e-10
ctg1662	CYC008F02	CYC008F02.f	chr12	90.48	168	16	242	409	14797860	14797693	5e-51
ctg1662	CYC008F02	CYC008F02.r	chr12	84.86	218	30	500	717	14634094	14634308	5e-39
ctg1662	CYC011C10	CYC011C10.f	chr7	97.22	36	1	61	96	35244992	35244957	5e-08
ctg1662	CYC011C10	CYC011C10.r	chr3	91.53	59	5	274	332	34850081	34850023	4e-12
ctg1662	CYC012J13	CYC012J13.f	chr10	91.53	59	5	21	79	19194422	19194480	4e-12
ctg1662	CYC023L01	CYC023L01.f	chr10	85.88	85	9	576	657	11259903	11259987	9e-10
ctg1662	CYC024E05	CYC024E05.f	chr21	92.16	51	4	200	250	44085902	44085852	4e-10
ctg1662	CYC024N18	CYC024N18.f	chr12	93.81	97	6	729	825	14925315	14925411	2e-32
ctg1662	CYC024N18	CYC024N18.r	chr24	100	29	0	173	201	31351314	31351286	2e-06
ctg1662	CYC025G06	CYC025G06.f	chr12	83.7	368	60	5	372	14567396	14567763	3e-65
ctg1662	CYC025G06	CYC025G06.r	chr18	87.14	140	14	412	551	31739856	31739991	2e-17
ctg1662	CYC025H02	CYC025H02.r	chr17	97.67	43	1	557	599	7497026	7496984	4e-12
ctg1662	CYC025J17	CYC025J17.r	chr8	84.91	159	18	195	353	45195504	45195352	4e-24
ctg1662	CYC031G18	CYC031G18.r	chr11	86.18	340	44	356	692	27613916	27614255	2e-78
ctg1662	CYC037I12	CYC037I12.f	chr3	87.14	70	9	368	437	14890859	14890928	3e-09
ctg1662	CYC043K20	CYC043K20.f	chr11	87.5	184	17	249	428	27825008	27825189	2e-41
ctg1662	CYC043K20	CYC043K20.r	chr11	86.97	261	33	297	557	28253779	28253520	3e-61
ctg1662	CYC048D13	CYC048D13.r	chr8	97.06	34	1	30	63	37003835	37003802	7e-07
ctg1662	CYC049K13	CYC049K13.f	chr11	85.84	226	32	110	335	27709869	27710094	2e-47
ctg1662	CYC049K13	CYC049K13.r	chr11	90.48	126	12	11	136	27995761	27995636	2e-35
ctg1662	CYC053B02	CYC053B02.f	chr11	97.44	39	1	234	272	12198569	12198531	7e-10
ctg1662	CYC054L04	CYC054L04.f	chr11	84.21	152	23	27	177	16548705	16548554	5e-20
ctg1662	CYC055N08	CYC055N08.f	chr3	87.14	70	9	368	437	14890859	14890928	4e-09
ctg1662	CYC055N08	CYC055N08.r	chr11	90.36	166	13	466	628	27632591	27632756	1e-45
ctg1662	CYC058I24	CYC058I24.f	chr6	92.68	41	3	219	259	37306231	37306271	3e-06
ctg1662	CYC065F11	CYC065F11.r	chr21	90.48	63	5	305	366	15370793	15370731	1e-09
ctg1662	CYC069G03	CYC069G03.r	chr23	93.44	61	4	412	472	14181415	14181355	9e-16
ctg1662	CYC070B18	CYC070B18.f	chr2	86.08	79	11	265	343	25127475	25127553	9e-10
ctg1662	CYC070B18	CYC070B18.r	chr14	93.75	48	3	378	425	15981957	15981910	2e-10
ctg1662	CYC080C01	CYC080C01.f	chr17	93.62	47	3	384	430	12957959	12958005	1e-09
ctg1662	CYC080C01	CYC080C01.r	chr20	95.31	277	13	1	277	10654568	10654844	2e-123
ctg1662	CYC080L05	CYC080L05.r	chr12	92.7	137	10	8	144	14925315	14925451	8e-47
ctg1662	CYC083O05	CYC083O05.f	chr12	87	223	29	53	275	14645036	14645258	9e-53
ctg1662	CYC085O19	CYC085O19.f	chr5	90	50	5	627	676	52748103	52748054	8e-07
ctg1662	CYC085O19	CYC085O19.r	chr8	89.41	85	9	455	539	45195494	45195410	3e-18
ctg1662	CYC090G13	CYC090G13.f	chr12	82.88	368	63	5	372	14567396	14567763	4e-58
ctg1662	CYC092N15	CYC092N15.f	chr11	83.89	149	21	1	146	27746709	27746561	3e-16
ctg1662	CYC092N15	CYC092N15.r	chr11	93.98	166	10	385	550	27547937	27548102	5e-64
ctg1662	CYC098L21	CYC098L21.f	chr1	81.03	348	65	449	796	28201825	28201479	1e-36
ctg1662	CYC133F19	CYC133F19.f	chr11	92.74	124	9	1	124	28002367	28002244	2e-41
ctg1662	CYC133F19	CYC133F19.r	chr11	91.16	328	29	153	480	27803670	27803997	2e-115
ctg1662	CYC136J12	CYC136J12.f	chr11	89.39	132	14	32	163	28231954	28231823	3e-34
ctg1662	CYC136J12	CYC136J12.r	chr11	90.74	108	10	422	529	27930427	27930534	1e-29
ctg1662	CYC136J13	CYC136J13.r	chr12	90.4	125	12	98	222	15152970	15152846	7e-35
ctg1662	CYC136L11	CYC136L11.f	chr11	89.55	134	14	30	163	28231956	28231823	2e-35
ctg1662	CYC136L11	CYC136L11.r	chr11	84.43	167	23	20	185	27927436	27927600	2e-19
ctg1672	CYC008G19	CYC008G19.r	chr3	88.46	78	9	407	484	37358608	37358685	5e-14
ctg1672	CYC025I15	CYC025I15.r	chr8	93.75	48	2	154	200	13040708	13040661	6e-08
ctg1672	CYC026G03	CYC026G03.f	chr19	91.04	67	6	191	257	19504669	19504735	2e-14
ctg1672	CYC047A16	CYC047A16.f	chr8	93.75	48	2	156	202	13040708	13040661	5e-08
ctg1672	CYC047A16	CYC047A16.r	chr6	91.11	45	4	323	367	50081084	50081128	3e-06
ctg1672	CYC047H20	CYC047H20.f	chr20	94.87	39	2	273	311	39103455	39103417	3e-07
ctg1672	CYC062G13	CYC062G13.f	chr15	96.08	51	2	714	764	11327450	11327500	2e-14
ctg1672	CYC062G13	CYC062G13.r	chr13	87.06	85	10	643	726	9228533	9228449	6e-11
ctg1672	CYC070N07	CYC070N07.f	chr10	90.74	54	3	136	189	4786248	4786197	2e-07
ctg1672	CYC076A14	CYC076A14.r	chr21	86.67	60	8	124	183	16003035	16002976	5e-06
ctg1672	CYC076A20	CYC076A20.f	chr13	88.73	71	8	602	672	30940381	30940451	4e-12
ctg1672	CYC080M11	CYC080M11.f	chr19	91.23	57	5	122	178	20278820	20278764	5e-11
ctg1672	CYC081L11	CYC081L11.f	chr19	94.97	318	16	137	454	19009525	19009842	1e-140
ctg1672	CYC081L11	CYC081L11.r	chr19	85.99	364	39	90	449	19235122	19234767	9e-77
ctg1672	CYC082E21	CYC082E21.f	chr1	92.31	52	4	423	474	10746945	10746996	2e-10
ctg1672	CYC082E21	CYC082E21.r	chr3	90.03	321	25	63	377	21752026	21752345	3e-99
ctg1672	CYC093N23	CYC093N23.f	chr7	86.17	94	13	546	639	43510933	43511026	6e-14
ctg1672	CYC093N23	CYC093N23.r	chr2	92.64	231	17	1	231	60216184	60216414	3e-86
ctg1672	CYC096O22	CYC096O22.f	chr7	92.86	42	3	284	325	39596522	39596563	8e-07
ctg1672	CYC096O22	CYC096O22.r	chr13	89.55	67	5	452	518	25743684	25743620	2e-10
ctg1681	CYC015M15	CYC015M15.f	chr24	88.46	130	15	57	186	32641864	32641735	1e-30
ctg1681	CYC015M15	CYC015M15.r	chr17	92.68	41	3	398	438	5778913	5778873	3e-06
ctg1681	CYC021G03	CYC021G03.f	chr24	92.49	293	18	19	307	32107054	32106762	9e-115
ctg1681	CYC026H12	CYC026H12.f	chr24	92.86	98	7	1	98	31040551	31040648	1e-30
ctg1681	CYC026H12	CYC026H12.r	chr24	88.41	233	14	1	220	32112388	32112156	3e-68
ctg1681	CYC056H13	CYC056H13.f	chr24	85.65	209	22	341	549	32565697	32565897	9e-44
ctg1681	CYC062M15	CYC062M15.f	chr24	93.29	328	19	37	362	32208312	32207986	7e-128
ctg1681	CYC062M15	CYC062M15.r	chr24	92.98	171	10	51	219	31071437	31071607	2e-57
ctg1681	CYC090O05	CYC090O05.f	chr23	91.67	48	4	687	734	11151669	11151716	6e-08
ctg169	CYC008E15	CYC008E15.f	chr5	84.5	200	29	6	205	23790075	23790272	2e-32
ctg169	CYC008E15	CYC008E15.r	chr18	90.14	71	7	347	417	21447252	21447322	1e-14
ctg169	CYC013B03	CYC013B03.f	chr17	90.29	618	60	226	843	38756276	38756893	0
ctg169	CYC013B03	CYC013B03.r	chr17	83	659	112	7	665	38830242	38829584	8e-115
ctg169	CYC015E05	CYC015E05.f	chr25	91.94	62	5	1	62	35115966	35115905	6e-14
ctg169	CYC015E05	CYC015E05.r	chr13	86.42	81	10	32	112	18638075	18637996	1e-08
ctg169	CYC017B18	CYC017B18.f	chr17	89.91	109	11	28	136	38892947	38893055	1e-27
ctg169	CYC017B18	CYC017B18.r	chr17	87.3	244	18	454	684	39272458	39272215	3e-62
ctg169	CYC017H14	CYC017H14.f	chr25	84.26	216	24	256	462	35689790	35689576	1e-36
ctg169	CYC024E07	CYC024E07.r	chr17	85.32	252	31	343	590	38512800	38513049	1e-45
ctg169	CYC025M07	CYC025M07.r	chr5	83.78	111	16	559	667	23871215	23871325	2e-07
ctg169	CYC028M06	CYC028M06.f	chr17	82.39	159	25	564	722	38960373	38960528	1e-15
ctg169	CYC028M06	CYC028M06.r	chr6	97.06	34	1	186	219	6423524	6423557	8e-07
ctg169	CYC029I08	CYC029I08.r	chr17	86.11	288	34	1	286	39122731	39123014	6e-57
ctg169	CYC030K14	CYC030K14.f	chr1	94.59	37	2	562	598	47044188	47044152	3e-06
ctg169	CYC030K14	CYC030K14.r	chr25	97.65	170	4	333	502	34995900	34996069	9e-81
ctg169	CYC034K23	CYC034K23.f	chr9	100	35	0	228	262	42112367	42112401	7e-10
ctg169	CYC034K23	CYC034K23.r	chr17	88.5	226	23	126	349	19707984	19707760	2e-57
ctg169	CYC035B15	CYC035B15.f	chr3	86.74	181	24	361	541	13008845	13009025	1e-39
ctg169	CYC038I24	CYC038I24.r	chr25	93.18	132	9	497	628	35419530	35419399	2e-38
ctg169	CYC038J13	CYC038J13.f	chr8	88.14	59	7	388	446	31202275	31202333	2e-07
ctg169	CYC038J13	CYC038J13.r	chr5	90.73	205	19	180	384	23735462	23735666	7e-66
ctg169	CYC039E14	CYC039E14.f	chr5	90.73	205	19	145	349	23735462	23735666	7e-66
ctg169	CYC040K04	CYC040K04.f	chr17	90.59	170	14	10	177	38680399	38680568	2e-50
ctg169	CYC050M04	CYC050M04.f	chr1	100	35	0	470	504	10559291	10559257	1e-09
ctg169	CYC053D15	CYC053D15.f	chr9	100	35	0	263	297	42112367	42112401	7e-10
ctg169	CYC053D15	CYC053D15.r	chr25	90.7	129	12	296	424	35255438	35255310	3e-37
ctg169	CYC054I19	CYC054I19.f	chr11	93.65	63	4	372	434	4070403	4070341	4e-17
ctg169	CYC054I19	CYC054I19.r	chr5	93.33	60	4	387	446	51876541	51876600	4e-15
ctg169	CYC054J13	CYC054J13.r	chr5	92.66	109	6	143	249	23875086	23874978	4e-33
ctg169	CYC057A23	CYC057A23.f	chr22	89.29	56	6	683	738	7538046	7537991	6e-08
ctg169	CYC057A23	CYC057A23.r	chr17	90.2	153	9	139	285	38949505	38949657	3e-39
ctg169	CYC058C18	CYC058C18.f	chr17	94.12	51	3	443	493	39254382	39254432	3e-12
ctg169	CYC067G04	CYC067G04.f	chr17	90.36	83	8	598	680	38667489	38667571	2e-19
ctg169	CYC067G04	CYC067G04.r	chr17	89.35	263	25	22	284	39039977	39039718	8e-72
ctg169	CYC071M18	CYC071M18.f	chr17	84.9	192	26	371	560	39014028	39014218	5e-27
ctg169	CYC071M18	CYC071M18.r	chr17	83.51	188	31	148	335	39285167	39284980	4e-27
ctg169	CYC077F11	CYC077F11.f	chr25	92.8	236	14	319	552	35195031	35195265	7e-85
ctg169	CYC077F11	CYC077F11.r	chr24	89.86	69	7	464	532	4867320	4867388	3e-13
ctg169	CYC081K19	CYC081K19.f	chr25	81.99	272	49	122	393	35049451	35049722	3e-34
ctg169	CYC081K19	CYC081K19.r	chr23	92.68	41	3	1	41	25705570	25705610	1e-06
ctg169	CYC088B04	CYC088B04.f	chr25	92.31	65	5	370	434	35341855	35341919	1e-15
ctg169	CYC088B04	CYC088B04.r	chr25	84.85	132	20	14	145	35578605	35578474	5e-20
ctg169	CYC097G18	CYC097G18.f	chr23	91.67	60	5	645	704	28879698	28879639	9e-13
ctg169	CYC098A07	CYC098A07.f	chr5	92.86	126	9	204	329	23943106	23942981	1e-42
ctg169	CYC098A07	CYC098A07.r	chr5	97.28	147	4	536	682	23731957	23732103	5e-67
ctg169	CYC132P14	CYC132P14.f	chr17	85.04	381	49	286	658	39356197	39355817	5e-76
ctg169	CYC132P14	CYC132P14.r	chr18	87.32	71	9	1	71	21213124	21213054	7e-10
ctg169	CYC136A20	CYC136A20.f	chr13	90.82	98	9	272	369	30229571	30229474	4e-26
ctg17	CYC014E10	CYC014E10.f	chr13	87.98	208	25	250	457	23888480	23888273	2e-53
ctg17	CYC014E10	CYC014E10.r	chr12	90.41	73	7	483	555	28944090	28944162	8e-16
ctg17	CYC020A12	CYC020A12.f	chr13	89.45	199	21	39	237	22974812	22974614	2e-57
ctg17	CYC020A12	CYC020A12.r	chr13	90.57	53	5	234	286	22782364	22782416	2e-08
ctg17	CYC021I03	CYC021I03.f	chr13	94.26	331	16	257	585	24870287	24869958	7e-137
ctg17	CYC021I03	CYC021I03.r	chr13	91.01	89	8	550	638	24511517	24511605	6e-23
ctg17	CYC023K20	CYC023K20.f	chr13	88.58	219	25	156	374	24838957	24838739	8e-60
ctg17	CYC023K20	CYC023K20.r	chr13	93.28	253	17	86	338	24539808	24540060	2e-99
ctg17	CYC024A17	CYC024A17.f	chr13	86.63	374	43	167	539	22436062	22436429	2e-81
ctg17	CYC024A17	CYC024A17.r	chr13	87.19	406	28	187	571	22877692	22877290	5e-98
ctg17	CYC028H21	CYC028H21.r	chr13	80.88	319	40	78	384	22877727	22878036	3e-19
ctg17	CYC030F01	CYC030F01.f	chr7	87.76	98	11	48	145	13242396	13242492	2e-16
ctg17	CYC030F01	CYC030F01.r	chr13	86.59	358	24	1	337	22877644	22877290	6e-79
ctg17	CYC032G07	CYC032G07.f	chr13	95.37	108	4	1	107	23575129	23575236	1e-39
ctg17	CYC032G07	CYC032G07.r	chr13	87.2	125	15	272	396	23871036	23870913	6e-23
ctg17	CYC033E19	CYC033E19.f	chr9	94.92	59	3	113	171	37525806	37525748	6e-17
ctg17	CYC033E19	CYC033E19.r	chr20	93.62	47	3	639	685	15210893	15210847	8e-10
ctg17	CYC034F05	CYC034F05.f	chr13	90.5	400	35	263	662	23506258	23506654	1e-135
ctg17	CYC034F05	CYC034F05.r	chr1	92.31	65	5	498	562	39250072	39250136	9e-16
ctg17	CYC034P02	CYC034P02.f	chr13	93.88	49	3	371	419	23456509	23456461	6e-11
ctg17	CYC034P02	CYC034P02.r	chr13	92.86	42	3	93	134	23068260	23068301	8e-07
ctg17	CYC035J07	CYC035J07.f	chr6	93.33	45	3	691	735	33022815	33022859	1e-08
ctg17	CYC035J07	CYC035J07.r	chr15	97.44	39	1	479	517	30902349	30902311	9e-10
ctg17	CYC042A07	CYC042A07.f	chr22	92.31	52	4	92	143	22959430	22959379	2e-10
ctg17	CYC044B01	CYC044B01.f	chr24	88.89	135	15	275	409	9043362	9043228	1e-33
ctg17	CYC047K04	CYC047K04.f	chr13	90.2	245	24	523	767	23689497	23689253	9e-78
ctg17	CYC047K04	CYC047K04.r	chr13	81.73	602	76	1	597	23575129	23575701	4e-86
ctg17	CYC048D22	CYC048D22.f	chr13	93.26	193	13	557	749	24240579	24240771	5e-73
ctg17	CYC048D22	CYC048D22.r	chr13	92.59	54	4	5	58	24479480	24479427	1e-11
ctg17	CYC053G08	CYC053G08.r	chr10	93.18	44	3	529	572	37549897	37549854	4e-08
ctg17	CYC058N10	CYC058N10.f	chr13	88.89	180	19	315	493	24643604	24643783	4e-46
ctg17	CYC058N10	CYC058N10.r	chr13	81.89	613	89	162	770	24948712	24948118	6e-88
ctg17	CYC059B11	CYC059B11.f	chr13	86.12	317	30	478	790	24271133	24270827	2e-69
ctg17	CYC059B11	CYC059B11.r	chr13	91.74	363	14	1	347	23951335	23951697	2e-131
ctg17	CYC063I14	CYC063I14.f	chr13	89.2	398	40	1	398	23559109	23558715	1e-116
ctg17	CYC063I14	CYC063I14.r	chr13	88.24	136	16	471	606	23254496	23254631	7e-32
ctg17	CYC063K08	CYC063K08.r	chr19	87.01	77	9	305	381	10985985	10986060	1e-08
ctg17	CYC069E06	CYC069E06.f	chr13	93.18	88	6	105	192	22975044	22975131	4e-27
ctg17	CYC069E06	CYC069E06.r	chr13	82.14	140	25	293	432	23265895	23265756	8e-13
[truncated: 11,451 more rows]
